# Supplementary material for: Sham treatment effects in manual therapy trials on back pain patients: a systematic review and pairwise meta-analysis
Source: PubMed Central journal article supplement — BMJ Open. 2021 May 4;11(5):e045106. doi: 10.1136/bmjopen-2020-045106 (PMC8098952; doi:10.1136/bmjopen-2020-045106), 2021-05-04
Supplement: bmjopen-2020-045106.draft_revisions.pdf [file bmjopen-2020-045106.draft_revisions.pdf]

# BMJ Open

BMJ Open is committed to open peer review. As part of this commitment we make the peer review history of every article we publish publicly available.

When an article is published we post the peer reviewers' comments and the authors' responses online. We also post the versions of the paper that were used during peer review. These are the versions that the peer review comments apply to.

The versions of the paper that follow are the versions that were submitted during the peer review process. They are not the versions of record or the final published versions. They should not be cited or distributed as the published version of this manuscript.

BMJ Open is an open access journal and the full, final, typeset and author-corrected version of record of the manuscript is available on our site with no access controls, subscription charges or pay-per-view fees (<http://bmjopen.bmj.com>).

If you have any questions on BMJ Open's open peer review process please email [info.bmjopen@bmj.com](mailto:info.bmjopen@bmj.com)

# BMJ Open

## Placebo effect in manual therapy trials on back pain patients: a systematic review and pair-wise meta-analysis

|                               |                                                                                                                                                      |
|-------------------------------|------------------------------------------------------------------------------------------------------------------------------------------------------|
| Journal:                      | <i>BMJ Open</i>                                                                                                                                      |
| Manuscript ID                 | bmjopen-2020-045106                                                                                                                                  |
| Article Type:                 | Original research                                                                                                                                    |
| Date Submitted by the Author: | 22-Sep-2020                                                                                                                                          |
| Complete List of Authors:     | Lavazza, Carolina; AIMO, Research<br>Galli, Margherita; AIMO, Research<br>Abenavoli, Alessandra; AIMO, Research<br>Maggiani, Alberto; AIMO, Research |
| Keywords:                     | COMPLEMENTARY MEDICINE, STATISTICS & RESEARCH METHODS, Back pain < ORTHOPAEDIC & TRAUMA SURGERY                                                      |
|                               |                                                                                                                                                      |

SCHOLARONE™  
Manuscripts

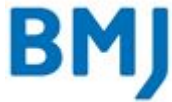

I, the Submitting Author has the right to grant and does grant on behalf of all authors of the Work (as defined in the below author licence), an exclusive licence and/or a non-exclusive licence for contributions from authors who are: i) UK Crown employees; ii) where BMJ has agreed a CC-BY licence shall apply, and/or iii) in accordance with the terms applicable for US Federal Government officers or employees acting as part of their official duties; on a worldwide, perpetual, irrevocable, royalty-free basis to BMJ Publishing Group Ltd ("BMJ") its licensees and where the relevant Journal is co-owned by BMJ to the co-owners of the Journal, to publish the Work in this journal and any other BMJ products and to exploit all rights, as set out in our [licence](#).

The Submitting Author accepts and understands that any supply made under these terms is made by BMJ to the Submitting Author unless you are acting as an employee on behalf of your employer or a postgraduate student of an affiliated institution which is paying any applicable article publishing charge ("APC") for Open Access articles. Where the Submitting Author wishes to make the Work available on an Open Access basis (and intends to pay the relevant APC), the terms of reuse of such Open Access shall be governed by a Creative Commons licence – details of these licences and which [Creative Commons](#) licence will apply to this Work are set out in our licence referred to above.

Other than as permitted in any relevant BMJ Author's Self Archiving Policies, I confirm this Work has not been accepted for publication elsewhere, is not being considered for publication elsewhere and does not duplicate material already published. I confirm all authors consent to publication of this Work and authorise the granting of this licence.

|                                                                                                                                                                                                                                                                                                                                                   |                                                                                                                                                                                                                                                                                                                                                                                                                                                                               |
|---------------------------------------------------------------------------------------------------------------------------------------------------------------------------------------------------------------------------------------------------------------------------------------------------------------------------------------------------|-------------------------------------------------------------------------------------------------------------------------------------------------------------------------------------------------------------------------------------------------------------------------------------------------------------------------------------------------------------------------------------------------------------------------------------------------------------------------------|
| <b>Title</b>                                                                                                                                                                                                                                                                                                                                      | Placebo effect in manual therapy trials on back pain patients: a systematic review and pair-wise meta-analysis                                                                                                                                                                                                                                                                                                                                                                |
| <b>Author's name</b>                                                                                                                                                                                                                                                                                                                              | Carolina Lavazza (0000-0002-9907-6819), Margherita Galli (0000-0003-4050-3131), A Abenavoli (0000-0001-8941-2308), A Maggiani (0000-0002-7980-9405)                                                                                                                                                                                                                                                                                                                           |
| <b>Address for each author</b><br>Separate each part of address with a comma (don't use a separate line for each part)<br>Please include postcodes<br><b>Authors' names and positions</b><br>Use same style of name as below title Please give one job position for each author, (under the relevant address) on separate line from author's name | Department of Research AIMO institute, Piazzale Santuario 7, 21047 Saronno, Italy, Carolina Lavazza associate professor, Department of Research AIMO institute, Piazzale Santuario 7, 21047 Saronno, Italy, Margherita Galli associate professor, Department of Research AIMO institute, Piazzale Santuario 7, 21047 Saronno, Italy, A Abenavoli associate professor, Department of Research AIMO institute, Piazzale Santuario 7, 21047 Saronno, Italy, A Maggiani professor |
| <b>Corresponding author</b>                                                                                                                                                                                                                                                                                                                       | Correspondence to:<br>carolina.lavazza@docenti.aimoedu.it                                                                                                                                                                                                                                                                                                                                                                                                                     |

**Copyright/license for publication:**

Carolina Lavazza The Corresponding Author of this article contained within the original manuscript which includes any diagrams & photographs within and any related or stand alone film submitted ("the Contribution") has the right to grant on behalf of all authors and does grant on behalf of all authors, a licence to the BMJ Publishing Group Ltd and its licencees, to permit this Contribution (if accepted) to be published in the BMJ and any other BMJ Group products and to exploit all subsidiary rights, as set out in our licence set out at:

<http://www.bmj.com/about-bmj/resources-authors/forms-policies-and-checklists/copyright-open-access-and-permission-reuse>.

Please tick **one or more** boxes as appropriate:

- I am the sole author of the Contribution.
- I am one author signing on behalf of all co-owners of the Contribution.
- The Contribution has been made in the course of my employment and I am signing as authorised by my employer.
- I am a US Federal Government employee acting in the course of my employment.
- I am not a US Federal Government employee, but some or all of my co-authors are.
- I am an employee of the UK Crown\* acting in the course of my employment
- I am a US Federal Government employee acting in the course of my employment.
- I am not a US Federal Government employee, but some or all of my co-authors are.
- I am an employee of the UK Crown acting in the course of my employment
- I am not an employee of the UK Crown acting in the course of my employment but some/all of my co-authors are.\*

\*Such authors should consult guidance and if necessary return any completed form.

**Licence:** The Corresponding Author has the right to grant on behalf of all authors and does grant on behalf of all authors, a worldwide licence to the Publishers and its licensees in perpetuity, in all forms, formats and media (whether known now or created in the future), to i) publish, reproduce, distribute, display and store the Contribution, ii) translate the Contribution into other languages, create adaptations, reprints, include within collections and create summaries, extracts and/or, abstracts of the Contribution, iii) create any other derivative work(s) based on the Contribution, iv) to exploit all subsidiary rights in the Contribution, v) the inclusion of electronic links from the Contribution to third party material where-ever it may be located; and, vi) licence any third party to do any or all of the above.

**Conflict of interest:** I have read and understood the BMJ Group policy on declaration of interests and declare the following interests: none

**Ethical approval:** not required.

**Transparency:** The manuscript's guarantor affirms that this manuscript is an honest, accurate, and transparent account of the study being reported; that no important aspects of the study have been omitted; and that any discrepancies from the study as planned (and, if relevant, registered) have been explained.

**Funding:** None.

1  
2  
3 **Competing interests:** No funding were provided for this project and authors did not received  
4 support from any organisation for the submitted work. Authors have no financial relationships  
5 with any organisations that might have an interest in this project and have no other  
6 relationships or activities that could appear to have influenced this review.  
7  
8  
9  
10  
11  
12  
13  
14  
15  
16  
17  
18  
19  
20  
21  
22  
23  
24  
25  
26  
27  
28  
29  
30  
31  
32  
33  
34  
35  
36  
37  
38  
39  
40  
41  
42  
43  
44  
45  
46  
47  
48  
49  
50  
51  
52  
53  
54  
55  
56  
57  
58  
59  
60

For peer review only

1  
2  
3  
4  
5  
6  
7  
8  
9  
10  
11  
12  
13  
14  
15  
16  
17  
18  
19  
20  
21  
22  
23  
24  
25  
26  
27  
28  
29  
30  
31  
32  
33  
34  
35  
36  
37  
38  
39  
40  
41  
42  
43  
44  
45  
46  
47  
48  
49  
50  
51  
52  
53  
54  
55  
56  
57  
58  
59  
60

### Acronyms

AE= adverse effects

BP= back pain

CI= confidence intervals

CT= clinical trial

MA = meta-analysis

MCID= minimal clinically important difference

MD=mean difference

MT= Manual Therapies

OMT = osteopathic manipulative treatment

PROs = patient-reported outcomes

RCT= randomised controlled trials

RR= risk ratio

SM= Spinal Manipulation

For peer review only

## ABSTRACT

### Objective:

To assess the effects and reliability of placebo in manual therapy (MT) trials in the treatment of back pain (BP) in order to provide methodological guidance for clinical trial development.

### Methods and analysis:

Different databases were screened up to 20 August 2020. RCT involving adults affected by BP, acute or chronic, were included.

Hand contact placebo was compared to different MT (physiotherapy, chiropractic, osteopathy, massage, kinesiology and reflexology) and to control. Primary outcomes were BP improvement, placebo reliability and adverse effect (AE). Secondary outcomes were number of dropouts. Dichotomous outcomes were analysed using risk ratio (RR), continuous using mean difference (MD), 95% confidence intervals (CI). The minimal clinically important difference was 30 mm changes in pain score.

### Results:

24 trials were included with 2,019 participants. Very low evidence quality suggests clinically insignificant pain improvement in favour of MT compared to placebo (MD 3.86, 95% CI 3.29 to 4.43) and no differences between placebo and control (MD -6.04, 95% CI -16.68 to 4.59). Placebo reliability shows a high percentage of correct detection by participants (ranged from 46.7% to 83.5%), spinal manipulation being the most recognized technique. Low quality of evidence suggests that AE and dropout rates were similar between placebo and MT (RR AE=0.84, 95% CI 0.55 to 1.28, RR dropouts= 0.98, 95% CI 0.77 to 1.25). A similar dropout rate in control (RR=0.79, 95% 0.51 to 1.23).

### Conclusions:

Comparison of placebo and MT shows a small, clinically meaningless effect in pain improvement. Similar effects were found with control. The heterogeneousness of placebo MT studies and the very low quality of evidence render uncertain these review findings. Future trials should develop reliable kinds of placebo, similar to active treatment, to ensure participant-blinding and to guarantee proper sample size for the reliable detection of clinically meaningful treatment effects.

**PROSPERO register:** CRD42020198301

[https://www.crd.york.ac.uk/prospERO/display\\_record.php?RecordID=198301](https://www.crd.york.ac.uk/prospERO/display_record.php?RecordID=198301)



## Strengths and limitations of this study

### Strengths

This systematic review and pair-wise meta-analysis:

- summarises existing evidence on the effectiveness, reliability and application of hand contact placebo in MT randomised controlled trials;
- gives suggestions for researchers on conducting methodical RCT in MT using a reliable placebo.

### Limitation

- This study did not include a comparison with machine provided placebo, its aim focused on hand contact placebo
- Insufficient number of studies were included to conduct a network meta-analysis

Summary of findings:

1. Placebo compared to Manual Therapies (MT)

Patient or population: back pain  
 Intervention: Placebo  
 Comparison: MT

| Outcomes                                                                         | Anticipated absolute effects* (95% CI) |                                                       | Relative effect (95% CI)         | No of participants (studies) | Certainty of the evidence (GRADE) | Comments                                                                                                                                                                                                                                                                            |
|----------------------------------------------------------------------------------|----------------------------------------|-------------------------------------------------------|----------------------------------|------------------------------|-----------------------------------|-------------------------------------------------------------------------------------------------------------------------------------------------------------------------------------------------------------------------------------------------------------------------------------|
|                                                                                  | Risk with MT                           | Risk with Placebo                                     |                                  |                              |                                   |                                                                                                                                                                                                                                                                                     |
| <b>Pain improvement</b> assessed with: VAS score<br>Scale from: 0 to 100         |                                        | <b>MD 3.86 higher</b><br>(3.29 higher to 4.43 higher) | -                                | 805<br>(15 RCTs)             | ⊕○○○<br>VERY LOW <sup>a,b</sup>   | A small effect, not clinically relevant, in pain improvement was detected in favour of MT. This analysis excluded two trials (one suspected of publication bias, one used a different scale) which increased heterogeneity levels but did not affect overall efficacy meaningfully. |
| <b>Adverse events</b> assessed with: number of AE occurred                       | 144 per 1.000                          | <b>121 per 1.000</b><br>(79 to 184)                   | <b>RR 0.84</b><br>(0.55 to 1.28) | 531<br>(6 RCTs)              | ⊕⊕○○<br>LOW <sup>a</sup>          | Pooled data from 6 studies did not show any difference in AE occurrence between placebo and MT.                                                                                                                                                                                     |
| <b>Dropouts rate</b> assessed with: number of participants that leaved the study | 174 per 1.000                          | <b>171 per 1.000</b><br>(134 to 218)                  | <b>RR 0.98</b><br>(0.77 to 1.25) | 1238<br>(11 RCTs)            | ⊕⊕○○<br>LOW <sup>a</sup>          | Pooled data from 11 trials did not show difference in dropout rate between placebo and MT.                                                                                                                                                                                          |

2. Placebo compared to Control

Patient or population: back pain  
 Intervention: Placebo  
 Comparison: control

| Outcomes                                                                         | Anticipated absolute effects* (95% CI) |                                                      | Relative effect (95% CI)         | No of participants (studies) | Certainty of the evidence (GRADE) | Comments                                                                                                                        |
|----------------------------------------------------------------------------------|----------------------------------------|------------------------------------------------------|----------------------------------|------------------------------|-----------------------------------|---------------------------------------------------------------------------------------------------------------------------------|
|                                                                                  | Risk with control                      | Risk with placebo                                    |                                  |                              |                                   |                                                                                                                                 |
| <b>Pain improvement</b> assessed with: VAS score<br>Scale from: 0 to 100         |                                        | <b>MD 6.04 lower</b><br>(16.68 lower to 4.59 higher) | -                                | 251<br>(4 RCTs)              | ⊕○○○<br>VERY LOW <sup>a,c,d</sup> | Pooled data from four trials, highly inconsistent, showed no differences between placebo and control group in pain improvement. |
| <b>Dropouts rate</b> assessed with: number of participants that leaved the study | 205 per 1.000                          | <b>162 per 1.000</b><br>(104 to 252)                 | <b>RR 0.79</b><br>(0.51 to 1.23) | 331<br>(5 RCTs)              | ⊕○○○<br>VERY LOW <sup>a,d</sup>   | Very low quality of evidence suggests no differences in dropout rate between placebo and control.                               |

\*The risk in the intervention group (and its 95% confidence interval) is based on the assumed risk in the comparison group and the relative effect of the intervention (and its 95% CI).  
 CI: Confidence interval; MD: Mean difference; RR: Risk ratio

**GRADE Working Group grades of evidence**

**High certainty:** We are very confident that the true effect lies close to that of the estimate of the effect

**Moderate certainty:** We are moderately confident in the effect estimate: The true effect is likely to be close to the estimate of the effect, but there is a possibility that it is substantially different

**Low certainty:** Our confidence in the effect estimate is limited: The true effect may be substantially different from the estimate of the effect

**Very low certainty:** We have very little confidence in the effect estimate: The true effect is likely to be substantially different from the estimate of effect

**Explanations**

- a. The majority of trials were judged as poor quality according to AHRQ standards.
- b. Most of the studies were small trial.
- c. Heterogeneity levels at 80%.
- d. Number of participants < 400

For peer review only

## Background

In Clinical Trials (CT), placebo is commonly used as control therapy to evaluate clinical effectiveness of the treatments tested. (1) Placebo has been defined as “an inert substance or sham procedure that is provided to research participants with the aim of making it impossible for them, and usually the researchers themselves, to know who is receiving an active or inactive intervention.” (2)

In Europe, its use in pharmacological CT has been regulated by CT Regulation No. 536/2014. According to this regulation, placebo must be treated as an Investigatory Medical Product (IMP) and as such it has to follow different standards in order to ensure quality, guarantee patient safety and the reliability of study results. (3)

Regulatory aspects of trials involving Manual Therapies (MT) are very different. Although these types of studies might be influenced by the type of placebo provided, no clear guidelines or regulations have been developed to ensure credibility of trial results and patient safety.

In MT trials, placebo treatment is often provided in different modalities from trial to trial although manual techniques or treatments tested are the same. For instance, placebo treatment is commonly administrated as a light touch in the site of pain or as an active treatment in a different site (4), with no clear criterion. Furthermore, in these studies, placebo reliability has been rarely evaluated. An analysis of its credibility results could help to understand better the participants' point of view, assessing which kind of placebo seems more similar to the active treatment provided.

Placebo effect, also called placebo response, is the reported improvement in symptoms among patients in randomized controlled trials (RCT). Since a placebo has no inherent therapeutic power, it rarely cures the disease but it may contribute to the relief of patients' symptoms such as pain.(5) Additionally, placebo might be related to an adverse effect called nocebo. It has been estimated that up to 26% of patients in RCTs discontinue placebo due to adverse effects. (6)

It is thought that these psychobiological phenomena may be related to the overall therapeutic context, such as treatment environment, individual patient and clinician factors (e.g. beliefs, desire for symptom changes), as well as the patient's expectations of improvement and prior experiences of the treatment. (7-10)

In pharmacological trials this overall therapeutic context and its influence on placebo response has been widely studied. (8) Less evidence is present for MT trials, where other important characteristics should be considered as part of this therapeutic context such as the tactile interaction between patient and practitioner and clinician beliefs. As a matter of fact, touch might have a positive health effect (11) and placebo might be influenced by the same therapist beliefs which are actively providing the inactive treatment. (12, 13)

Another important factor that has to be taken into account is that RCTs involving MT usually use patient-reported outcomes (PROs) - such as pain - as primary outcomes. Studies suggested that physical placebo treatments might have a greater effect on these types of outcome compared to pharmacological placebo and that this effect might be consequent to the physical contact. (1, 14, 15)

Therefore, a better understanding of placebo response in manual treatment would be fundamental to define the real difference in efficacy between active and inactive treatment, with a better knowledge of the effect of manual contact on PROs such as pain relief and dropouts.

1  
2  
3 The role of placebo in MT trials is still very confused and the lack of guidelines allows huge  
4 discrepancies in its use in RCTs. A clear definition of placebo effect could improve trial design,  
5 implementing studies with a proper power and sample size, defining clinical relevance of MT and  
6 giving more reliability to study results.

7  
8 The aim of this systematic review with pair-wise meta-analyses (MA) is to evaluate the use of  
9 placebo in MT trials in order to analyse the effects, possible harm and the reliability of different  
10 kinds of sham treatments provided in RCTs involving MT. A systematic review could help to define  
11 placebo standards to be applied in CT in order to guarantee methodological quality and patient  
12 safety.  
13  
14  
15

### 16 **Objective**

17 To assess the benefits, potential harm and reliability of placebo in manual therapy (MT)  
18 randomized controlled trials in the treatment of back pain (BP) in order to provide  
19 methodological guidance for clinical trial development.  
20  
21  
22  
23

## 24 **Methods**

25  
26  
27 This systematic review and meta-analysis was performed following the Preferred Reporting  
28 Items for Systematic Reviews (PRISMA)(16).

29 The protocol registration was performed in PROSPERO (<http://www.crd.york.ac.uk/PROSPERO/>)  
30 and review registration number is **CRD42020198301**.  
31  
32  
33  
34  
35

### 36 **Criteria for considering studies for this review**

37  
38 Only randomised controlled studies (RCTs) were included in this review. Quasi-randomised  
39 trials in which allocation was not strictly random (e.g. date of birth or toss of a coin) were  
40 excluded. No restrictions were applied to language or setting.

41 Studies were considered eligible if they included adult participants with acute or chronic back  
42 pain including coccyx, lumbar, dorsal and cervical. Trials where pain is related to muscular  
43 conditions, articular disorders (such as osteoarthritis) or spinal disc herniation were included.  
44 Trials where musculoskeletal diseases were secondary to other pathologies (e.g. amyotrophic  
45 lateral sclerosis, fibromyalgia etc.) were excluded.

46  
47 Trials where pain was related to fracture, surgery, dysmenorrhoea, post-partum or pregnancy,  
48 headache or dizziness were excluded.

49 This review involved all types of placebo that include **hand contact**, studies where placebo was  
50 provided by machines (such as inactive ultrasound) were excluded.

51 All trials that involved hand contact placebo as light touch or a manual treatment in a different  
52 site were included.

53 Placebo was compared to other manual therapies such as: physiotherapy, chiropractic,  
54 osteopathy, massage, kinesiology and reflexology and to control.

55 Physiotherapeutic exercises were included in the analysis only if associated with manual  
56 treatment.  
57  
58  
59  
60

1  
2  
3 The use of active co-interventions such as oral NSAIDs or other active treatments was accepted  
4 if used in all trial arms. Trials with more than two arms of intervention were included, but only  
5 data of interested arms were extracted.  
6  
7

## 8 9 **Outcomes**

10  
11 Primary outcomes were pain intensity on a validated scale, reliability of placebo and adverse  
12 effect. Secondary outcomes were number of dropouts.

13 Whenever the meta-analysis could not be performed, a narrative summary of the outcomes  
14 have been provided. Outcomes were divided into short ( $\leq 2$  months), medium ( $\leq 4$  months) and  
15 long-term ( $\geq 6$  months). Data were extracted and analysed based on the time closest to these  
16 intervals.  
17  
18

## 19 20 21 **Information sources**

22  
23 Search strategy (**Appendix 1**) was adapted to the different databases by an experienced  
24 information specialist.

25 RCTs were identified in different databases (up to 20 August 2020): MEDLINE, Embase, CINAHL,  
26 SPORTDiscus, PEDro, World Health Organization Clinical Trials Registration Platform, Index to  
27 Chiropractic Literature, Cochrane central register of controlled trials (CENTRAL), Clinical trials  
28 registry and metaRegister of Controlled Trials (mRCT).

29 Researchers of unpublished trials, but completed and registered, were contacted by CL to  
30 obtain data.  
31  
32

33  
34 The search in PROSPERO, in the Cochrane Library and in PubMed (clinical queries) was  
35 performed to evaluate the presence of on-going or recently completed systematic reviews.  
36 Guidelines from different organizations (e.g. National Council for Osteopathic Research etc.)  
37 were reviewed and references from relevant publication were analysed.  
38  
39  
40  
41  
42  
43  
44  
45  
46  
47  
48  
49  
50  
51  
52  
53  
54  
55  
56  
57  
58  
59  
60

1  
2  
3  
4  
5  
6  
7  
8  
9  
10  
11  
12  
13  
14  
15  
16  
17  
18  
19  
20  
21  
22  
23  
24  
25  
26  
27  
28  
29  
30  
31  
32  
33  
34  
35  
36  
37  
38  
39  
40  
41  
42  
43  
44  
45  
46  
47  
48  
49  
50  
51  
52  
53  
54  
55  
56  
57  
58  
59  
60

### **Data collection and analysis**

Searches results were screened by two independent reviewers who identified all the potentially eligible trials based on title and abstract. Full-texts of all the selected articles were screened firstly for inclusion. If full-text was not available, or the trial was completed but not published, *CL* contacted the authors in order to obtain the information needed or the document delivery service of the 3Bi Biella library.

Uncertainty about the inclusion of a study were discussed by the two reviewers. If no agreement was reached by the two reviewers a third reviewer (*AM*) was asked for their opinion.

The selection process was recorded and reported through a PRISMA flow diagram.

### **Data extraction and management**

Data extraction was performed by two reviewers with a tested pre-defined form. Data extracted were related to settings, type of study, participants characteristics (such as localization and duration of pain, pain score at baseline, previous similar treatment), interventions, outcomes used in the meta-analysis and other relevant data such as difference in placebo and active treatment or funding. (**Appendix 2**)

### **Risk of bias in individual studies**

Bias risk was assessed by *CL* and agreed by *MG* using the Cochrane Risk of bias (CRB) tool (27). This tool was used to assess selection bias, performance bias, attrition bias, reporting bias and other biases.

Each possible risk was evaluated as "high", "medium" or "low" by *CL* and a revision of the judgments was performed by *MG*. RevMan 5.3.5 was used for the graphic representation of each risk. The CRB tool results were then converted to AHRQ Standards to assess the quality of the study (Good, Fair, and Poor). Trials were judged as good quality when bias risk was judged as low, studies with fair quality were trials where at least one criteria was high risk, poor quality studies instead were trials with two or more criteria with high or unclear risk.

### **Assessment of reporting biases**

Funnel plots were created to explore reporting bias, whenever more than 10 studies were included in the meta-analysis. Furthermore, for each study, an analysis of possible conflicts of interest and funding sources was performed.

### **Summary measures**

Dichotomous outcomes, such as adverse events (occurred or not), were analysed using risk ratio (RR) with 95% confidence intervals (CI).

Continuous outcomes, such as back pain on VAS scale, were evaluated using mean difference (MD) between placebo and the MT/control group with 95% CI and the standard deviation (SD). The minimal clinically important difference (MCID) between pre- and post-treatment was taken as 30 mm changes in 100 mm pain score. (17-19) These values were used for the interpretation of the clinical significance of the findings.

12

1  
2  
3 Placebo reliability was reported with a percentage of patients guessing correctly the treatment  
4 allocation.

5 In this review the unit of analysis was the participant.  
6  
7  
8

### 9 **Assessment of heterogeneity**

10  
11 The presence of heterogeneity was assessed with a visual inspection of the forest plots and  
12 through an inconsistency level test ( $I^2$ ).

13 Cochrane Handbook was used for threshold interpretation: heterogeneity was considered as  
14 unimportant for value of  $I^2$  between 0% and 40%, as moderate for values between 30% and  
15 60% , as substantial for values between 50% an 90% and considerable for values between 75%  
16 to 100%. (20)  
17  
18  
19

### 20 **Synthesis of results**

21  
22  
23 Meta-analysis of pain score, AE and dropout rates were performed using RevMan 5.3.5  
24 whenever possible. The meta-analyses compared all kinds of placebo with all types of manual  
25 therapies and to control. Random-effect model was used when a substantial inconsistency was  
26 present ( $I^2= 50-90\%$ ). (20) When considerable heterogeneity was present ( $I^2>75\%$ ) and could  
27 not be explained by clinical or methodological diversity, the results have been presented  
28 narratively.  
29

30  
31 The statistical significance of measured effects was determined evaluating the p-value and 95%  
32 CI.  
33  
34  
35

### 36 **Additional analyses**

37  
38 Different subgroup analyses were planned in the protocol such as on placebo type provided  
39 (applied locally or in different sites from pain), type of manual technique tested (single or  
40 multiple techniques) and localization of back pain. However, due to the small number of studies  
41 included in this review, only a few subgroup analyses were conducted on follow-up periods.  
42  
43

44 Sensitivity analysis was conducted for the primary outcomes to assess the effects of skewed  
45 and imputed data on the effect measure. These analyses are reported as appendices.  
46  
47  
48

### 49 **Summarizing results and assessing the quality of the evidence**

50  
51 The quality of evidence for each outcome was evaluated with the GRADE approach by two  
52 independent authors and any disagreement was discussed. The quality for each effect measure  
53 was judged as high, moderate, low or very low (21). The GRADE approach was used to assess  
54 the quality of the key outcomes. The software GRADEpro (<https://gradepr.org>) was used to  
55 import data from RevMan 5.3.5 and to create “summary of findings tables”.  
56

57 The following outcomes were chosen to be presented: pain scores at short-term, AE and  
58 dropouts.  
59  
60



1  
2  
3  
4  
5  
6  
7  
8  
9  
10  
11  
12  
13  
14  
15  
16  
17  
18  
19  
20  
21  
22  
23  
24  
25  
26  
27  
28  
29  
30  
31  
32  
33  
34  
35  
36  
37  
38  
39  
40  
41  
42  
43  
44  
45  
46  
47  
48  
49  
50  
51  
52  
53  
54  
55  
56  
57  
58  
59  
60

**Patient and Public Involvement**

There was no involvement of patients or public during the outline of this project.

For peer review only

## Results

### PRISMA 2009 Flow Diagram

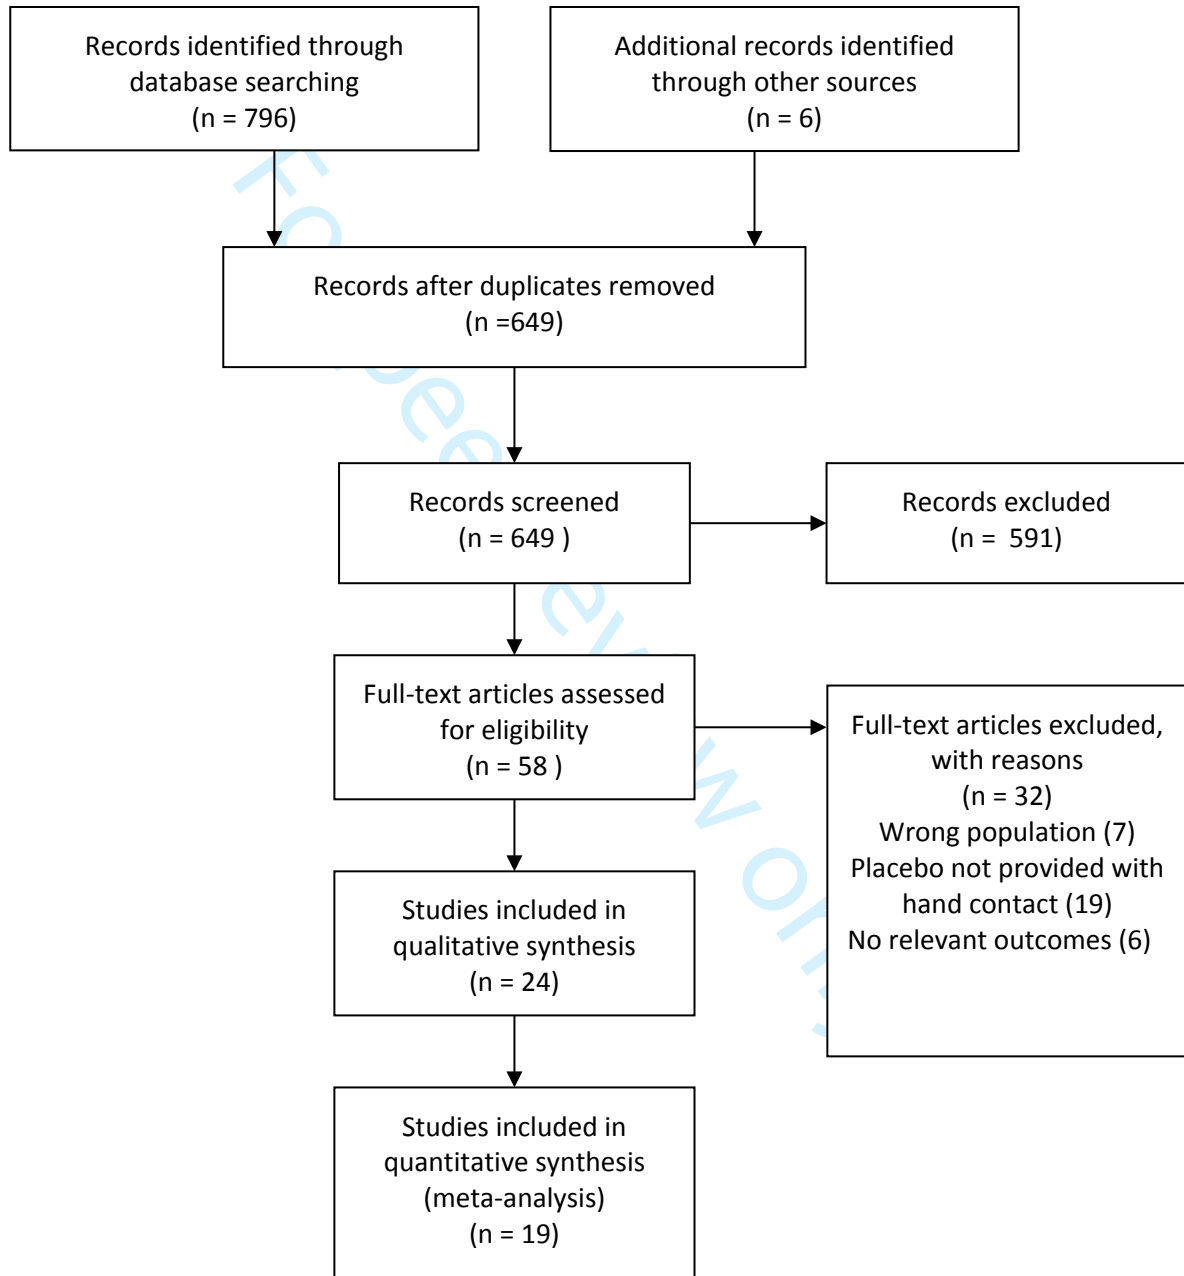

**Figure 1:** PRISMA flow diagram

## Included studies

All 24 studies included in this review were RCT. One study had a 2x2 factorial design, (22) eight studies had multiple arms. (23-30) Only arms involving the interested treatments were included in analyses.

Most of the studies were conducted in physical therapy clinics, in 13 different countries. Three trials did not report where their were conducted. (27, 31, 32)

Eight trials were conducted in Europe , (25, 26, 28, 33-37) five in the United States, (22, 23, 29, 38, 39) three studies in Brazil, (40-42) one in UK, (24) Egypt, (30) Japan (43) and Australia. (44)

No ongoing or unpublished trials were found.

## Population

The included trials randomized a total of 2,019 participants, the majority of studies were small with a median of 50 participants and a range from 15 to 455.

Most trials included middle aged patients (mean 39,9 range from 18 to 73) with a mean BMI of 21,7 kg/m<sup>2</sup>.

The majority of studies included both genders, with a percentage of male that ranged from 19% to 80% and a percentage of women that ranged from 20% to 82%. Two trials included only male, (36, 42) one study included only female participants. (40)

16 trials enrolled participants with low back pain (LBP), nine included participants with cervical pain (CP).

The majority of trials (N=15) included participants with unspecified cause of back pain. Disk herniation was considered in three trials,(25, 28, 42) other three studies included participants with mechanical pain (described as pain exacerbated by movement). (23, 24, 39).

Duration of symptoms were unassessed in eight trials, most of the studies included participants with chronic pain (N=9), some included participants with both acute and chronic pain.

Participants with experience of the tested treatment were included in 8 trials (22, 27, 29, 30, 33, 35, 40, 41) and excluded in four. (24, 34, 37, 39) Remaining studies did not provide this information.

## Interventions

Interventions deferred for number of sessions and number of techniques applied. Most of the trials used a single therapy session (N=11) with a single technique performed (N=8).

Trials with different therapy sessions ranged from 5 (23, 24, 28) to 20 (25) sessions once a week.

## Placebo

Placebo was provided with a hand contact on the area of pain in 19 studies, five studies provided placebo in a different area from where the pain was located. (25, 33, 41, 43, 44)

In trials providing spinal manipulation, as inactive treatment the majority of authors used the similar placement of hands on participants without any force applied. (38-40, 42)

Two trials used a placebo with similar forces applied in different directions. (23, 30) one trial did not specify the inactive manipulation applied(27).

In trials that provided multiple techniques in the same treatment session (such as osteopathic treatment, spinal mobilization and physiotherapy) the placebo was administered with different techniques that mimed active treatments using light touch or light tractions.

Only one trial compared one single placebo technique with both single active technique and multiple treatment techniques. In this case only data of the first arm were extracted. (35)

## Active and controls treatments

Different active treatments were provided:

- Physiotherapy (2 trials, 288 participants)
- Spinal manipulation (SM)/chiropractic (7 studies, 567 participants)
- Osteopathy (5 trials, 645 participants)
- Kinesiology (one trial, 58 participants)
- Articular mobilizations (5 trials, 325 participants)
- Muscular release (4 trials, 136 participants)

Five trials with multiple arms compared placebo to control group (343 participants).

The active treatment was generally applied in the area of pain, some trials used techniques additionally in other areas. Just one trial using reflexology provided both active and inactive manipulation in a different zone. (37)

Characteristics of practitioner who administered treatments were provided by 16 trials. Most of the trials involved physiotherapists (N=8), generally defined physical therapists (N=4), osteopaths (N=3) and students (N=1). Only seven studies provided information on years of practice experience of physicians involved that ranged from 6 to 17 years. (28, 31, 33-35, 38, 40, 42). Information of their gender was provided only in three trials. (24, 28, 35)

**Table 1:** summary of main characteristics of included studies

| Study ID                     | N° of participants | Symptoms duration          | Pain localization | Technique tested ( <i>site of application</i> )           | Type of placebo                                              | Other arms                     | Follow-up                                                |
|------------------------------|--------------------|----------------------------|-------------------|-----------------------------------------------------------|--------------------------------------------------------------|--------------------------------|----------------------------------------------------------|
| Antonilos-Campillo PJ 2014   | 40                 | Not reported               | Cervical          | Soft-tissue ( <i>cervical region</i> )                    | Soft mobilization of lower limbs                             | None                           | No follow-up (outcomes collected after the intervention) |
| Bialosky J 2014              | 110                | > 4 months                 | Lumbar            | Spinal Manipulation (SM) ( <i>lumbar spine</i> )          | Ineffective force applied on lumbar spine                    | Control group                  | 2 weeks                                                  |
| Cleland JA 2005              | 36                 | >2 months                  | Cervical          | SM ( <i>thoracic spine</i> )                              | Ineffective force applied on thoracic spine                  | None                           | No follow-up (outcomes collected after the intervention) |
| Eardley S 2013               | 58                 | > 3 years                  | Lumbar            | Kinesiology ( <i>spine</i> )                              | Protocol of ineffective techniques in the site of pain       | Control group                  | 7 weeks                                                  |
| Erdogmus S 2007              | 120                | $\geq 1.4$ weeks           | Lumbar            | Physiotherapy ( <i>spine</i> )                            | Neck massage                                                 | Control group                  | 1.5 years                                                |
| Hall T 2004                  | 24                 | Not reported               | Lumbar            | BLR technique ( <i>lower limbs</i> )                      | Soft-tissue manipulation of the foot                         | None                           | 24 hours                                                 |
| Haller H 2016                | 54                 | > 7 months                 | Cervical          | Cranio-sacral therapy ( <i>head</i> )                     | Ineffective touch of head                                    | None                           | 3 months                                                 |
| Hansen F 1993                | 168                | $\geq 18$ days             | Lumbar            | Physiotherapy ( <i>lumbar spine and abdomen</i> )         | Intermittent traction of the spine                           | Intensive back muscle training | 1 year                                                   |
| Hidalgo B 2015               | 32                 | Not reported               | Lumbar            | Articular mobilization ( <i>lumbar spine</i> )            | Ineffective mobilization forces applied on lumbar spine      | None                           | 2 weeks                                                  |
| Hoiriis K 2004               | 156                | $\geq 2,3$ weeks           | Lumbar            | SM ( <i>spine</i> )                                       | Ineffective force applied on spine                           | Medical treatment              | 4 weeks                                                  |
| Klein R 2003                 | 61                 | >1 month and <5 years      | Cervical          | Strain-counterstrain techniques ( <i>cervical spine</i> ) | Ineffective force applied on cervical spine                  | None                           | No follow-up (outcomes collected after the intervention) |
| Kogure A 2015                | 179                | > 12 months and < 10 years | Lumbar            | AKA-H ( <i>sacro-iliac joint</i> )                        | Ineffective force applied on sacro-iliac joint               | None                           | 6 months                                                 |
| Krekoukias G 2017            | 50                 | Not reported               | Lumbar            | Articular mobilization techniques ( <i>lumbar spine</i> ) | Hand contact with lumbar skin placement without any movement | Exercise plus TENS             | 5 weeks                                                  |
| Lascurain-Aguirrebena I 2018 | 40                 | Not reported               | Cervical          | Articular mobilization ( <i>Cervical spine</i> )          | Ineffective force applied on cervical spine                  | None                           | No follow-up (outcomes collected after the intervention) |
| Licciardone J 2003           | 91                 | $\geq 3$ months            | Lumbar            | Osteopathic manual treatment (OMT) ( <i>all body</i> )    | Protocol of light touch techniques similar to OMT            | Control group                  | 6 months                                                 |

|                            |     |                  |          |                                                                                    |                                                                                                                       |               |                                                          |
|----------------------------|-----|------------------|----------|------------------------------------------------------------------------------------|-----------------------------------------------------------------------------------------------------------------------|---------------|----------------------------------------------------------|
|                            |     |                  |          |                                                                                    | applied to all body                                                                                                   |               |                                                          |
| <b>Licciardone J 2013</b>  | 455 | $\geq 3$ months  | Lumbar   | Osteopathic manual treatment (OMT) – ( <i>all body</i> )                           | Protocol of light touch techniques similar to OMT applied to all body                                                 | None          | 8 weeks                                                  |
| <b>Pires FP 2015</b>       | 32  | > 3 months       | Cervical | SM ( <i>thoracic spine</i> )                                                       | Ineffective force applied on thoracic spine                                                                           | None          | 72 hours                                                 |
| <b>Quinn F 2008</b>        | 15  | Not reported     | Lumbar   | Reflexology ( <i>foot</i> )                                                        | Foot massage with less pressure and in different reflex point (not related to the spine)                              | None          | 18 weeks                                                 |
| <b>Selkow M 2009</b>       | 20  | 1-6 weeks        | Lumbar   | Muscular energy technique ( <i>anterior superior iliac spine and lower limbs</i> ) | Practitioner hand positioned as active treatment but participant rested for 30 seconds without any active contraction | None          | 24 hours                                                 |
| <b>Senna MK 2011</b>       | 93  | $\geq 13$ months | Lumbar   | SM ( <i>lumbar spine</i> )                                                         | Ineffective force applied on lumbar spine                                                                             | Maintained SM | 10 months                                                |
| <b>Sillevis R 2010</b>     | 100 | $\geq 23$ months | Cervical | SM ( <i>thoracic spine</i> )                                                       | Ineffective force applied on thoracic spine                                                                           | None          | No follow-up (outcomes collected after the intervention) |
| <b>Silva A 2019</b>        | 28  | >3 months        | Cervical | Osteopathic visceral treatment ( <i>abdomen</i> )                                  | Hand contact on umbilical region without any movement                                                                 | None          | 7 days                                                   |
| <b>Veira-Pellez F 2014</b> | 40  | Not reported     | Lumbar   | SM ( <i>lumbar/sacral spine</i> )                                                  | Ineffective force applied on lumbar/sacral joints                                                                     | None          | No follow-up (outcomes collected after the intervention) |
| <b>Younes M 2017</b>       | 17  | < 3 months       | Lumbar   | OMT ( <i>all spine</i> )                                                           | Placebo mimed active treatment with an ineffective force applied.                                                     | None          | 7 days                                                   |

1  
2  
3  
4  
5  
6  
7  
8  
9  
10  
11  
12  
13  
14  
15  
16  
17  
18  
19  
20  
21  
22  
23  
24  
25  
26  
27  
28  
29  
30  
31  
32  
33  
34  
35  
36  
37  
38  
39  
40  
41  
42  
43  
44  
45  
46  
47  
48  
49  
50  
51  
52  
53  
54  
55  
56  
57  
58  
59  
60

### ***Risk of bias in included studies***

**Figure 2** shows risks of bias judged by two authors.

Blinding of participants and assessors will be described due to the nature of this review.

According to AHRQ standards of CRB tool, (45) the majority of trials were judged with poor quality (N=22). Good quality was conferred on only two studies. (34, 43)

The random sequence and allocation concealment were adequately reported in 71% and 63% of trials respectively.

The lack of blinding of participants was the most common bias and was judged as high risk in 38% of studies, while 38% were considered as unclear risk.

The reasons for this judgment were mainly related to trials involving spinal manipulations.

These studies used a technique which can be easily recognized by patients as active treatment for the popping sound emitted by joints. Additionally, these trials involved participants who could have already received this type of treatment, making the masking of technique almost impossible.

Blinding of outcomes was evaluated mainly as unclear risk in 46% of trials. Only two trials reported the strategies adopted to guarantee assessor blinding. (26, 30)

Incomplete outcome data was the least common bias risk with 80% of trials judged as low risk.

Reporting bias was evaluated unclear in 55% of trials where registration number and trial protocol were not reported or found.

Other bias occurred was generally considered at high risk for baseline differences of the population in 30% of trials.

**Figure 2:** *Risk of bias summary. Review authors' judgements about each risk of bias item for each included study.*

## Effects of intervention

### Placebo versus other manual therapies

#### Pain

The following outcomes on back pain are presented with a 100 mm visual analogue scale, 0 to 100; higher scores refer to worse pain. Trials using a 10mm scales were converted to 100mm scores.

The comparison between placebo and MT was performed in 17 studies. One trial used a different scale and data were obtained with a conversion formula.<sup>(25)</sup> Data from seven studies could not be extracted.

The meta-analysis at short-term showed substantial heterogeneity levels using a random-effects model. To further investigate inconsistency levels, a sensitivity analysis excluding two trials was performed. One trial used a different validated scale, (25) while the other was suspected of publication bias (28). This thought was verified with a funnel plot, which showed an asymmetric distribution with the inclusion of these two studies (**Appendix 3**). This sensitivity analysis did not influence overall effectiveness results but inconsistency levels decreased considerably at short-term. It can be deduced that a possible cause of heterogeneity was found (**Full analysis in appendix 4**)

The sensitivity analysis using a fixed-model at short-term showed a slight difference, not clinically meaningful, between placebo and MT in favour of MT on pain outcome (MD 3.86, 95%CI 3.29 to 4.43, 805 participants,  $I^2=42%$ ,  $p<0.0001$ , very low quality of evidence downgraded two levels for very serious risk of bias and imprecision). (**Figure 3**)

**Figure 3:** Forest plot of comparison Placebo versus MT in back pain outcome at short-term.

Comparisons between placebo and MT at medium and long-term could not be performed due to substantial levels of heterogeneity found using a random-effects model. The heterogeneity levels were not explainable by clinical or methodological diversities within trials (medium-term  $I^2=91%$   $P<0.0001$ , long-term  $I^2=81%$   $P=0.005$ ) (**Appendix 4.1**)



## Reliability of placebo

Reliability of placebo was evaluated in five trials; one did not report the results. (28) Patients were asked to assess if they understood their treatment allocations. Due to the type of data extracted (percentage of correct guessing) meta-analysis was not performed and results are reported descriptively.

Two trials compared placebo with SM, these trials showed a correct perception of treatment allocation that ranged from 63.5% (23) to 83.5%. (27) In this last study patients were considered eligible if they already received SM.

One trial compared placebo to an articular mobilization technique. 54.5% participants correctly guessed treatment allocation. (44)

Participants of one study that compared placebo to reflexology had the lowest perception of the correct detection of allocation (46.7%). Participants in this trials were naïve to the type of treatment tested. (37)

## Dropouts

Pooled data from 11 trials at the last follow-up suggested no difference in dropouts rate between placebo and MT at the end of the trials(105/612 compared to 109/626; RR 0.98, 95% CI 0.77 to 1.25 ; 1238 participants,  $I^2=0%$ ,  $P=0.90$ ; low quality of evidence downgraded two levels for high risk of bias). (**Figure 4**)

**Figure 4:** Forest plot of comparison Placebo versus MT in number of dropouts outcome

## Adverse effects

Adverse effects were generally under-reported, six trials were included in the meta-analysis.(24-26, 34, 35, 43)

Two trials reported AE overall occurrence without specified event rates in the groups. (22, 30). AE were predominantly minor and lasted for two/three days after treatment, in the majority of trials transient worse pain, tiredness, muscle weakness and transient headache were reported.(24, 34, 35, 43)

Senna M 2011 reported the most common AE were local discomfort and tiredness but no serious complications were noted. (30)

Haller H 2016 reported two patients dropping out from the trial for recurrent headache after treatments, both Haller H and Klein R 2013 reported dizziness of one patient.

Licciardone J 2013 reported 27% of patients with AE, 2% had serious AE not related to study interventions. (22)

Overall results showed no clear difference in AE occurrence between placebo and MT (32/267 compared to 38/264; RR 0.84, 95% CI 0.55 to 1.28; 531 participants,  $I^2=26%$ ,  $P=0.42$ ; low quality of evidence downgraded two levels for inconsistency). (**Figure 5**) Senna and Licciardone were excluded from analysis because they did not provide separate data for each group.

**Figure 5:** Forest plot of comparison Placebo versus MT in number of adverse events outcome at short-term

## Placebo versus control

### Pain

Five studies compared placebo to control, four were included in random-effect meta-analysis at short-term. (23-25, 27) Data from one trial could not be extracted. (29)

Pooled data showed the presence of significant heterogeneity, therefore results are reported narratively: three trials showed no difference between placebo and control on pain outcome, while Eardley S. 2013 showed an effect in favour of placebo (pooled data from 4 trials: MD -6.04, 95%CI from -16.68 to 4.59, 252 participants,  $I^2=80\%$ ,  $P=0.27$ ). The exclusion of Erdogmus S 2013 (that used a different scale) did not affect the results of effectiveness but decreased levels of heterogeneity (MD -9.72, 95%CI -19.94 to 0.51,  $I^2=69\%$ ,  $P=0.12$ ) (**Appendix 5**)

### Dropouts

No differences were showed in the fixed-effect meta-analysis on dropout rate between placebo and control in five trials (27/165 compared to 34/166; RR 0.79, 95% CI 0.51 to 1.23 ; 331 participants,  $I^2=0\%$ ,  $P=0.30$ ; very low quality of evidence downgraded two levels for very serious risk of bias and imprecision). (**Figure 6**)

**Figure 6:** Forest plot of comparison Placebo versus MT in number of dropouts outcome

### Adverse effects

Of the six studies reporting AE, only two compared placebo and control. One, Eardley S 2013, did not evaluate the AE occurred in control group while Erdogmus C 2007 reported that 10/40 in the control group and 11/40 in placebo group turned to other therapies for complains.

## Discussion

In the treatment of back pain very low quality of evidence suggests a slight improvement of pain, not clinically meaningful, in favour of MT at short-term. Substantial levels of heterogeneity within the four studies analysed, showed no differences between placebo and control in pain reduction.

Reliability of placebo was reported in four trials that compared placebo to MT, with high percentage of correct detection of treatment allocations by participants.

AE were generally under-reported, with a similar rate of occurrence between placebo and MT accompanying low levels of heterogeneity. Only one study reported AE in control group with no significant difference from placebo.

SM techniques were the treatment most evaluated (N=7). These techniques are highly recognizable by patients for a popping sound emitted by the column during their performance. (46) The fact that participants enrolled in these trials were eligible despite having already received SM, threatens the validity of blinding. This thought is strengthened by the high percentage of participants who recognized treatment allocation in this kind of trial (from 63.5% to 83.5%)(23, 27).

Additionally, five trials applied placebo treatment in a different site compared to pain and active treatment. This might have had important influences on study results.

Reliability placebo seemed not to be related to dropouts rate, although both these data were reported only in two trials. Bialosky J and Hoiriis K showed high percentages of correct treatment allocation detection by participants but dropout rate between placebo and MT group did not differ. These results seem to be in conflict, nevertheless, participants could have wanted to remain in the trial for several other reasons such as settings or being evaluated by an expert clinician free. This possibility is reinforced by the fact that a similar dropout rate was reached in the comparison placebo versus control. These data suggest that dropout rate might not be a dependable outcome for assessing reliability of placebo.

This review included generally small trials. Only 14 of 24 studies performed a sample size calculation but just two of these considered MCID in this computation. The MCID is the measure of smallest change of PROs that patients perceive as important, beneficial or harmful. MCID is useful for clinicians to interpret the findings of trials and apply them in clinical practice and to their decision-making. (47)An adequate sample size calculation, using MCID especially in trials with PROs, is fundamental to assess the number of participants needed to detect clinically relevant treatment effects. Oversized trials, which expose too many people to unnecessary therapies, or underpowered trials, which may not achieve significant results, should be avoided. (48-50)

Our results are similar to other reviews findings, notwithstanding that these reviews did not consider the difference between kinds of placebo provided (hand contact or machines) and evaluated the effect of a singular type of MT (such as SM or OMT) compared to placebo. (51, 52)

## Limitations

This review aimed to compare different kinds of placebo with different kinds of MT and control. The nature of this comparison needed an NMA, but this analysis could not be performed due to the small number of trials using hand contact placebo. The decision to include only this kind of sham therapy was mainly due to the intention of analysing the effect of manual interaction between practitioner and patients, which is suspected of leading to an amplified placebo effect.<sup>(11)</sup> Additionally, the use of machine placebo trials in the same meta-analysis could have increased diversity within trials included due to the possible enhanced presence of biases such as performance and consequently detection ones.

Although the population differed - some trials analysed cervical, others lumbar pain with different aetiologies and different symptoms duration - this factor did not affect the meta-analysis performed, as highlighted by the low heterogeneity found in the primary outcome. As already suggested by other authors,<sup>(1)</sup> placebo effect might be influenced by chronic pain, nevertheless, in this review, this analysis could not be performed due to the range of pain duration in trials included (from acute to chronic in the same trial).

Data concerning settings and operators were insufficient to evaluate the influence of these two factors on placebo response. Experience of practitioners was considered in data extraction but insufficient information was provided by authors to draw any hypothesis.

Another limit was in not considering non-objective outcomes as primary outcome for meta-analysis. Nevertheless, most of the trials included did not evaluate an objective outcome and the few studies which analysed this type of outcome used different kinds of scales not easily comparable in a meta-analysis

Pair-wise comparison on pain outcome between placebo and MT showed slightly higher effects of MT in trials where blinding was ensured. A linear regression analysis was planned to assess the impact of blinding on meta-analysis results. Due to the small number of trials, this analysis could not be performed. This trend follows what has been already suggested by other studies.<sup>(53)</sup> However trials with bigger sample size are needed to assess a real correlation between these two factors.

## Implications for practice and research

There is very low quality of evidence that placebo compared to MT might be less effective and equally safe in the treatment of patients affected by back pain. Future studies should improve their methodological properties to ensure patients safety and to guarantee reliability of study results.

Researchers should pay particular attention to sample size calculation using the MCID. This difference is fundamental both for research and patients. MCID indicates patients' values and preferences and can help clinicians improve interpretation and promote the understanding of the importance of intervention effects in RCTs.

Trials should also implement strategies to guarantee patients and assessors blinding, for example avoiding the inclusion of participants who already received the active treatment. Plans to avoid performance bias, such as giving similar treatment with similar localization have to be implemented. Moreover, the evaluation of the reliability of blinding should be considered as, at least, secondary outcome.

1  
2  
3  
4  
5  
6  
7  
8  
9  
10  
11  
12  
13  
14  
15  
16  
17  
18  
19  
20  
21  
22  
23  
24  
25  
26  
27  
28  
29  
30  
31  
32  
33  
34  
35  
36  
37  
38  
39  
40  
41  
42  
43  
44  
45  
46  
47  
48  
49  
50  
51  
52  
53  
54  
55  
56  
57  
58  
59  
60

Future researches should also evaluate the real effects of placebo comparing it both with active treatment and to control groups. Only with this kind of design the real placebo effect in MT could be defined.

Trials should also focus on including participants with similar characteristics such as duration of symptoms (acute or chronic pain).

The majority of studies included in this review used a single technique treatment (N=11), however the clinical relevance of demonstrating the effectiveness of a singular technique is not clear. In a clinical context, most manual treatments usually involve different kinds of techniques in the same treatment session, so trials that evaluate the effectiveness of a type of treatment should include a routine of techniques in order to be more similar to clinical approaches. Studies should also consider using objective end points, not patient-reported or observer-reported, with a longer period of follow-up.

## Conclusions

This review aimed to evaluate placebo effect in MT trials. Although MT showed higher efficacy than placebo, these findings were not clinically meaningful and the very low quality of the included studies might undermine the reliability of this reviews' results.

The use of placebo and its application in MT study is very controversial. Future trials should focus on developing a reliable kind of placebo, similar to the active treatment, to ensure participants blinding and to guarantee a proper sample size for the detection of reliable, clinically relevant, treatment effects.

### Contributors:

*CL* conceived the idea of this review and designed the study with the contribution of *MG* who also helped in literature search and in the interpretation of study findings. *CL* and *MG* revised studies, performed data extraction and analysis and wrote this review.

*AA* and *AM* provided clinical and technical support, reviewed the manuscript and helped in publication and with the clinical interpretation of study findings.

*CL* is the guarantor of this paper. The corresponding author attests that all listed authors meet authorship criteria and that no others meeting the criteria have been omitted.

**Acknowledgements:** We thank Valentina Rotondi, statistician, for all her support during the statistical analysis and data interpretation. We thank Roberta Maoret, librarian, for helping us in the search strategy implementation.

**Data sharing:** Details of the characteristics of the included studies and data extracted are available from the corresponding author at [carolina.lavazza@docenti.aimoedu.it](mailto:carolina.lavazza@docenti.aimoedu.it).

## References

1. Meissner K, Fässler MRG, Kleijnen J, Hróbjartsson A, Schneider A, Linde K. Differential effectiveness of placebo treatments: a systematic review of migraine prophylaxis. *JAMA internal medicine*. 2013;173(1941-1951).
2. Sciences CfIOoM. International Ethical Guidelines for Health-Related Research Involving Humans, Fourth Edition. Geneva2016.
3. REGULATION (EU) No 536/2014 OF THE EUROPEAN PARLIAMENT AND OF THE COUNCIL of 16 April 2014 on clinical trials on medicinal products for human use, and repealing Directive 2001/20/EC, (2014).
4. Kawchuk GN, Haugen R, Fritz J. A true blind for subjects who receive spinal manipulation therapy. *Archives of physical medicine and rehabilitation*. 2009;90(2):366-8.
5. Cai L, He L. Placebo effects and the molecular biological components involved. *General psychiatry*. 2019;32(5):1-10.
6. Kaptchuk TJ, Miller FG. Placebo effects in medicine. *N Engl J Med*. 2015;373(1):8-9.
7. Finniss DG, Kaptchuk TJ, Miller F., Benedetti F. Placebo effects: biological, clinical and ethical advances. *Lancet*. 2010;375:686.
8. Price DD, Finniss DG, Benedetti F. A comprehensive review of the placebo effect: recent advances and current thought. *Annu Rev Psychol*. 2008;59:565-90.
9. Miller FG, Kaptchuk TJ. The power of context: reconceptualizing the placebo effect. *Journal of the Royal Society of Medicine*. 2008;101:222-5.
10. Colloca L, Miller FG. The nocebo effect and its relevance for clinical practice. *Psychosomatic medicine*. 2011;73:598-603.
11. Monroe CM. The effects of therapeutic touch on pain. *Journal of Holistic Nursing*. 2009;27(2):85-92.
12. Chaibi A, Benth JŠ, Russell MB. Validation of placebo in a manual therapy randomized controlled trial. *Scientific reports*. 2015;5(1):1-8.
13. Koes BW. How to evaluate manual therapy: value and pitfalls of randomized clinical trials. *Manual therapy*. 2004:183-4.
14. Hróbjartsson A, Gøtzsche PC. Placebo interventions for all clinical conditions. *Cochrane database of systematic reviews*. 2004;2.
15. Kaptchuk TJ, Stason WB, Davis RB, Legedza AR, Schnyer RN, Kerr CE et al. Sham device v inert pill: randomised controlled trial of two placebo treatments. *BMJ*. 2006;332:391-7.
16. PRISMA. Transparent reporting of systematic reviews and meta-analyses <http://prisma-statement.org/prismastatement/flowdiagram.aspx2009> [
17. Pool JJ, Ostelo RW, Hoving JL, Bouter LM, De Vet HC. Minimal clinically important change of the Neck Disability Index and the Numerical Rating Scale for patients with neck pain. *Spine*. 2007;32(26):3047-51.
18. Ostelo RW, Stratford P, Waddell G, Croft P, Von Korff M, Henrica C. Interpreting change scores for pain and functional status in low back pain: towards international consensus regarding minimal important change. *Spine*. 2008;33(1):90-4.
19. Farrar JT, Young Jr JP, LaMoreaux L, Werth JL, Poole RM. Clinical importance of changes in chronic pain intensity measured on an 11-point numerical pain rating scale. *Pain*. 2001;94(2):149-58.



1  
2  
3  
4  
5  
6  
7  
8  
9  
10  
11  
12  
13  
14  
15  
16  
17  
18  
19  
20  
21  
22  
23  
24  
25  
26  
27  
28  
29  
30  
31  
32  
33  
34  
35  
36  
37  
38  
39  
40  
41  
42  
43  
44  
45  
46  
47  
48  
49  
50  
51  
52  
53  
54  
55  
56  
57  
58  
59  
60

20. Library C. Identifying and measuring heterogeneity  
[http://handbook.cochrane.org/chapter\\_9/9\\_5\\_2\\_identifying\\_and\\_measuring\\_heterogeneity.htm2011](http://handbook.cochrane.org/chapter_9/9_5_2_identifying_and_measuring_heterogeneity.htm2011) [
21. Training C. GRADE approach to evaluating the quality of evidence: a pathway  
<http://training.cochrane.org/path/grade-approach-evaluating-quality-evidence-pathway2013> [
22. Licciardone JC, Minotti DE, Gatchel RJ, Kearns CM, Singh KP. Osteopathic manual treatment and ultrasound therapy for chronic low back pain: a randomized controlled trial. *The Annals of Family Medicine*. 2013;11(2):122-9.
23. Bialosky JE, George SZ, Horn ME, Price DD, Staud R., Robinson ME. Spinal manipulative therapy-specific changes in pain sensitivity in individuals with low back pain (NCT01168999). *Journal of Pain*. 2014;15(2):136-48.
24. Eardley S, Brien S, Little P, Prescott P, Lewith G. Professional kinesiology practice for chronic low back pain: single-blind, randomised controlled pilot study. . *Complementary Medicine Research*. 2013;20(3):180-8.
25. Erdogmus CB, Resch KL, Sabitzer R, Müller H, Nuhr M, Schögl A et al. Physiotherapy-based rehabilitation following disc herniation operation: results of a randomized clinical trial. . *Spine*. 2007;32(19):2041-9.
26. Hansen FR, Bendix T, Skov P, Jensen CV, Kristensen JH, Krohn L et al. Intensive, dynamic back-muscle exercises, conventional physiotherapy, or placebo-control treatment of low-back pain. A randomized, observer-blind trial. *Spine*. 1993;18(1):98-108.
27. Hoiriis KT, Pflieger B, McDuffie FC, Cotsonis G, Elsangak O, Hinson R et al. A randomized clinical trial comparing chiropractic adjustments to muscle relaxants for subacute low back pain. *Journal of manipulative and physiological therapeutics*. 2004;27(6):388-98.
28. Krekoukias G, Gelalis ID, Xenakis T, Gioftsos G, Dimitriadis Z, Sakellari V. Spinal mobilization vs conventional physiotherapy in the management of chronic low back pain due to spinal disk degeneration: a randomized controlled trial. *Journal of Manual and Manipulative Therapy*. 2017;25(2):66-73.
29. Licciardone JC, Stoll ST, Fulda KG, Russo DP, Siu J, Winn W et al. Osteopathic manipulative treatment for chronic low back pain: A randomized controlled trial. *Spine*. 2003;28(13):1355-62.
30. Senna MK, Machaly SA. Does maintained spinal manipulation therapy for chronic nonspecific low back pain result in better long-term outcome? *Spine*. 2011;36(18).
31. Lascurain-Aguirrebeña I, Newham DJ, Casado-Zumeta X, Lertxundi A, Critchley DJ. Immediate effects of cervical mobilisations on global perceived effect, movement associated pain and neck kinematics in patients with non-specific neck pain. A double blind placebo randomised controlled trial. *Musculoskeletal Science and Practice*. 2018;38:83-90.
32. Selkow NM, Grindstaff TL, Cross KM, Pugh K, Hertel J, Saliba S. Short-term effect of muscle energy technique on pain in individuals with non-specific lumbopelvic pain: a pilot study. . *Journal of manual & manipulative therapy*. 2009;19(1):14E-8E.
33. Antolinos-Campillo PJ, Oliva-Pascual-Vaca A, Rodríguez-Blanco C, Heredia-Rizo AM, Espí-López G. V., Ricard F. Short-term changes in median nerve neural tension after a suboccipital muscle inhibition technique in subjects with cervical whiplash: a randomised controlled trial. *Physiotherapy*. 2014;100(3):249-55.
34. Haller H, Lauche R, Cramer H, Rampp T, Saha FJ, Ostermann T et al. Craniosacral therapy for the treatment of chronic neck pain: a randomized sham-controlled trial. *The Clinical journal of pain*. 2016;32(5):441- 9.

- 1  
2  
3 35. Klein R, Bareis A, Schneider A, Linde K. Strain-counterstrain to treat restrictions of the  
4 mobility of the cervical spine in patients with neck pain—A sham-controlled randomized trial.  
5 *Complementary Therapies in Medicine*. 2013;21(1):1–7.
- 6  
7 36. Younes M, Nowakowski K, Didier-Laurent B, Gombert M, Cottin F. Effect of spinal  
8 manipulative treatment on cardiovascular autonomic control in patients with acute low back  
9 pain. *Chiropractic and Manual Therapies*. 2017;25(1).
- 10  
11 37. Quinn F, Hughes CM, Baxter GD. Reflexology in the management of low back pain: A  
12 pilot randomised controlled trial. *Complementary Therapies in Medicine*. 2008;16(1):3-8.
- 13  
14 38. Sillevius R, Cleland J, Hellman M, Beekhuizen K. Immediate effects of a thoracic spine  
15 thrust manipulation on the autonomic nervous system: a randomized clinical trial. . *Journal of*  
16 *Manual & Manipulative Therapy* . 2010;18.
- 17  
18 39. Cleland JA, Childs MJD, McRae M, Palmer JA, Stowell T. Immediate effects of thoracic  
19 manipulation in patients with neck pain: a randomized clinical trial. . *Manual therapy*.  
20 2005;10(2):127-35.
- 21  
22 40. Pires PF, Packer AC, Dibai-Filho AV, Rodrigues-Bigaton D. Immediate and short-term  
23 effects of upper thoracic manipulation on myoelectric activity of sternocleidomastoid muscles  
24 in young women with chronic neck pain: A randomized blind clinical trial. . *Journal of*  
25 *manipulative and physiological therapeutics*. 2015;38(8).
- 26  
27 41. Silva AC, Biasotto-Gonzalez DA, Oliveira FHM, Andrade AO, Gomes CAFDP, Lanza FDC et  
28 al. Effect of osteopathic visceral manipulation on pain, cervical range of motion, and upper  
29 trapezius muscle activity in patients with chronic nonspecific neck pain and functional  
30 dyspepsia: a randomized, double-blind, placebo-controlled pilot study. . *Evidence-Based*  
31 *Complementary and Alternative Medicine*. 2018;2018:1-9.
- 32  
33 42. Vieira-Pellenz F, Oliva-Pascual-Vaca Á, Rodriguez-Blanco C, Heredia-Rizo AM, Ricard F,  
34 Almazán-Campos G. Short-term effect of spinal manipulation on pain perception, spinal  
35 mobility, and full height recovery in male subjects with degenerative disk disease: a randomized  
36 controlled trial. . *Archives of physical medicine and rehabilitation*. 2014;95(9):1613-9.
- 37  
38 43. Kogure A, Kotani K, Katada S, Takagi H, Kamikozuru M, Isaji T et al. A randomized, single-  
39 blind, placebo-controlled study on the efficacy of the arthrokinematic approach-hakata method  
40 in patients with chronic nonspecific low back pain. *PloS one*. 2015;10(12):1-16.
- 41  
42 44. Hall T, Hardt S, Schafer A, Wallin L. Mulligan bent leg raise technique—a preliminary  
43 randomized trial of immediate effects after a single intervention. *Manual Therapy*.  
44 2006;11(2):130-5.
- 45  
46 45. Higgins JPT, Green S. *Cochrane Handbook for Systematic Reviews of*  
47 *Interventions* Version 5.1.0 [updated March 2011]. . [https://handbook-5-](https://handbook-5-1.cochrane.org/index.htm#chapter_8/8_assessing_risk_of_bias_in_included_studies.htm)  
48 [1.cochrane.org/index.htm#chapter\\_8/8\\_assessing\\_risk\\_of\\_bias\\_in\\_included\\_studies.htm](https://handbook-5-1.cochrane.org/index.htm#chapter_8/8_assessing_risk_of_bias_in_included_studies.htm): The  
49 Cochrane Collaboration; 2011.
- 50  
51 46. Dunning J, Mourad F, Barbero M, Leoni D, Cescon C, Butts R. Bilateral and multiple  
52 cavitation sounds during upper cervical thrust manipulation. . *BMC musculoskeletal disorders*.  
53 2013;14(1):24.
- 54  
55 47. Johnston BC, Ebrahim S, Carrasco-Labra A, Furukawa TA, Patrick DL, Crawford MW et al.  
56 Minimally important difference estimates and methods: a protocol. *BMJ Open*. 2015;5:1-5.
- 57  
58 48. Charles P, Giraudeau B, Dechartres A, Baron G, Ravaud P. Reporting of sample size  
59 calculation in randomised controlled trials. 338. 2009;b1732.
- 60  
61 49. Moher D, Hopewell S, Schulz KF, Montori V, Gøtzsche PC, Devereaux PJ et al. CONSORT  
2010 explanation and elaboration: updated guidelines for reporting parallel group randomised  
trials. . *International journal of surgery*. 2012;10(1):28-55.



1  
2  
3  
4  
5  
6  
7  
8  
9  
10  
11  
12  
13  
14  
15  
16  
17  
18  
19  
20  
21  
22  
23  
24  
25  
26  
27  
28  
29  
30  
31  
32  
33  
34  
35  
36  
37  
38  
39  
40  
41  
42  
43  
44  
45  
46  
47  
48  
49  
50  
51  
52  
53  
54  
55  
56  
57  
58  
59  
60

50. Turner RM, Bird SM, Higgins JP. The impact of study size on meta-analyses: examination of underpowered studies in Cochrane reviews. *PloS one*. 2013;8(3).
51. Ruddock JK, Sallis H, Ness A, Perry RE. Spinal manipulation vs sham manipulation for nonspecific low back pain: a systematic review and meta-analysis. *Journal of chiropractic medicine*. 2016;15(3):165-83.
52. Rubinstein SM, De Zoete A, Van Middelkoop M, Assendelft WJ, De Boer MR, Van Tulder MW. Benefits and harms of spinal manipulative therapy for the treatment of chronic low back pain: systematic review and meta-analysis of randomised controlled trials. *BMJ*. 2019;364.
53. Rubinstein SM, van Eekelen R, Oosterhuis T, de Boer MR, Ostelo RW, van Tulder MW. The risk of bias and sample size of trials of spinal manipulative therapy for low back and neck pain: analysis and recommendations. *Journal of manipulative and physiological therapeutics*. 2014;37(8):523-41.

For peer review only

|                             | Random sequence generation (selection bias) | Allocation concealment (selection bias) | Blinding of participants and personnel (performance bias) | Blinding of outcome assessment (detection bias) | Incomplete outcome data (attrition bias) | Selective reporting (reporting bias) | Other bias |
|-----------------------------|---------------------------------------------|-----------------------------------------|-----------------------------------------------------------|-------------------------------------------------|------------------------------------------|--------------------------------------|------------|
| Antolin-Campillo P. J. 2014 | +                                           | ?                                       | -                                                         | -                                               | +                                        | ?                                    | +          |
| Bialosky J. 2014            | +                                           | +                                       | -                                                         | -                                               | +                                        | +                                    | +          |
| Cleland J.A. 2005           | +                                           | ?                                       | ?                                                         | ?                                               | +                                        | ?                                    | ?          |
| Eardley S. 2013             | ?                                           | ?                                       | +                                                         | ?                                               | +                                        | +                                    | -          |
| Erdogmus C. 2007            | ?                                           | +                                       | -                                                         | -                                               | +                                        | +                                    | ?          |
| Haller H. 2016              | +                                           | +                                       | +                                                         | +                                               | +                                        | +                                    | +          |
| Hall T. 2004                | +                                           | +                                       | +                                                         | +                                               | +                                        | ?                                    | -          |
| Hansen F. 1993              | -                                           | ?                                       | ?                                                         | +                                               | +                                        | ?                                    | +          |
| Hidalgo B. 2015             | ?                                           | +                                       | -                                                         | +                                               | +                                        | +                                    | ?          |
| Hofrils K. 2004             | +                                           | ?                                       | ?                                                         | -                                               | -                                        | ?                                    | +          |
| Klein R. 2013               | +                                           | +                                       | +                                                         | +                                               | +                                        | ?                                    | -          |
| Kogure A. 2015              | +                                           | +                                       | +                                                         | +                                               | +                                        | ?                                    | +          |
| Krekoukias G. 2017          | +                                           | ?                                       | ?                                                         | ?                                               | +                                        | -                                    | +          |
| Lascuain-Agulrebena I. 2018 | ?                                           | -                                       | ?                                                         | -                                               | +                                        | -                                    | -          |
| Licciardone J. 2003         | +                                           | ?                                       | -                                                         | ?                                               | -                                        | -                                    | -          |
| Licciardone J. 2013         | +                                           | +                                       | -                                                         | ?                                               | +                                        | -                                    | +          |
| Pires F.P. 2015             | ?                                           | ?                                       | -                                                         | ?                                               | +                                        | +                                    | +          |
| Quinn F. 2008               | +                                           | +                                       | +                                                         | -                                               | ?                                        | ?                                    | ?          |
| Selkow N.M. 2009            | +                                           | +                                       | ?                                                         | ?                                               | +                                        | ?                                    | -          |
| Senna M.K. 2011             | +                                           | +                                       | ?                                                         | -                                               | ?                                        | -                                    | +          |
| Sillevis R. 2010            | +                                           | +                                       | ?                                                         | ?                                               | +                                        | ?                                    | ?          |
| Silva A. 2018               | +                                           | +                                       | -                                                         | ?                                               | ?                                        | ?                                    | -          |
| Vieira-Pellez F. 2014       | +                                           | +                                       | -                                                         | ?                                               | +                                        | ?                                    | ?          |
| Younes M. 2017              | ?                                           | ?                                       | ?                                                         | ?                                               | +                                        | ?                                    | ?          |

**Figure 2:** Risk of bias summary. Review authors' judgements about each risk of bias item for each included study.

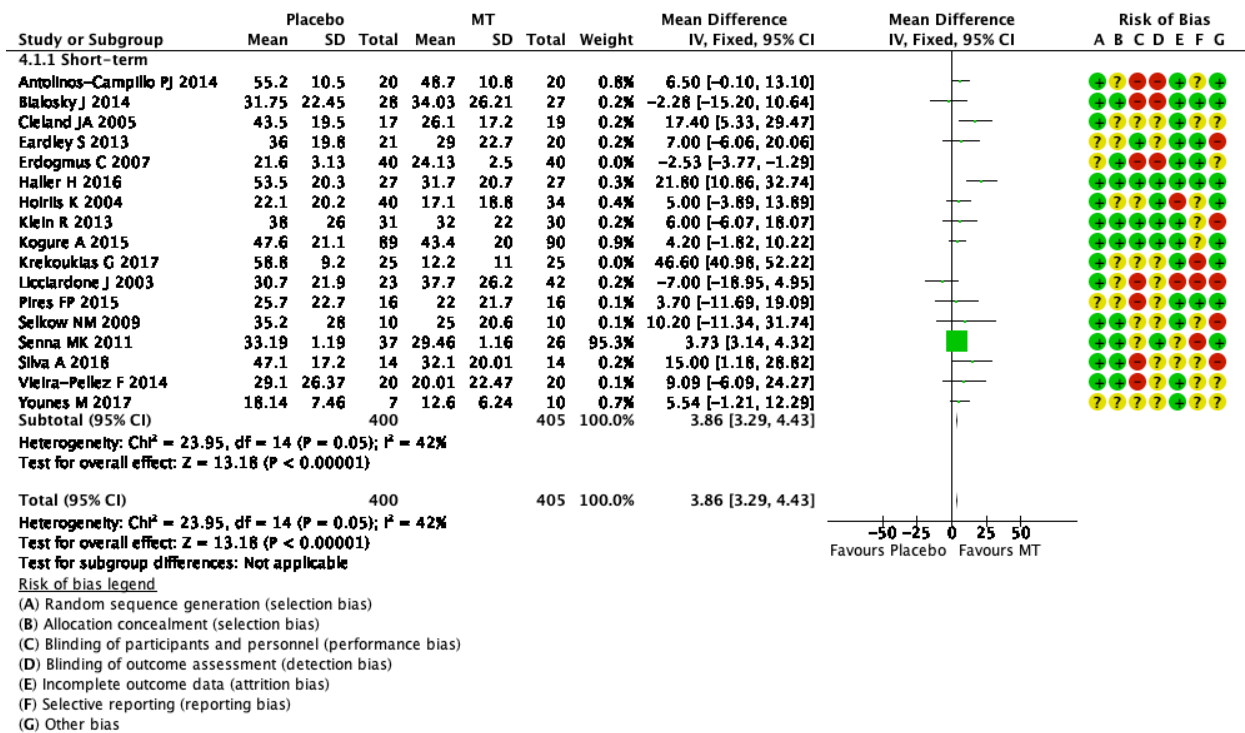

Figure 3: Forest plot of comparison Placebo versus MT in back pain outcome at short-term.

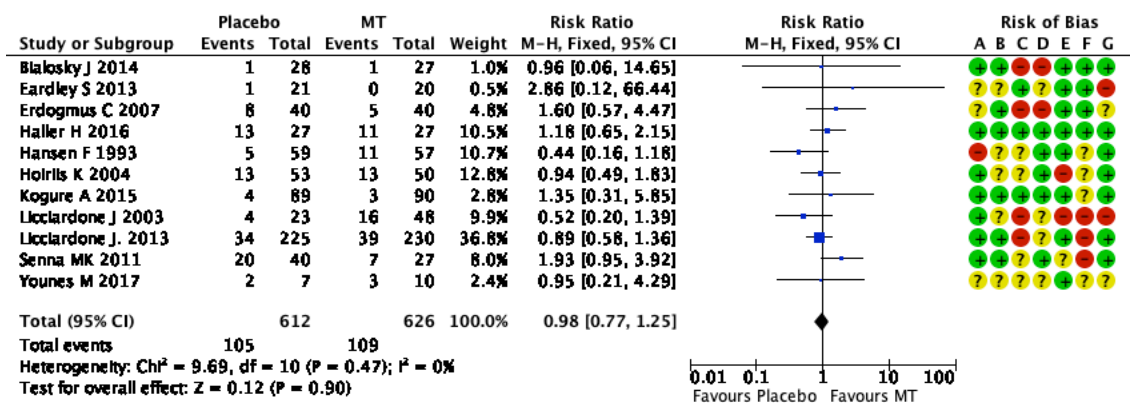

**Risk of bias legend**  
 (A) Random sequence generation (selection bias)  
 (B) Allocation concealment (selection bias)  
 (C) Blinding of participants and personnel (performance bias)  
 (D) Blinding of outcome assessment (detection bias)  
 (E) Incomplete outcome data (attrition bias)  
 (F) Selective reporting (reporting bias)  
 (G) Other bias

**Figure 4:** Forest plot of comparison Placebo versus MT in number of dropouts outcome

1  
2  
3  
4  
5  
6  
7  
8  
9  
10  
11  
12  
13  
14  
15  
16  
17  
18  
19  
20  
21  
22  
23  
24  
25  
26  
27  
28  
29  
30  
31  
32  
33  
34  
35  
36  
37  
38  
39  
40  
41  
42  
43  
44  
45  
46  
47  
48  
49  
50  
51  
52  
53  
54  
55  
56  
57  
58  
59  
60

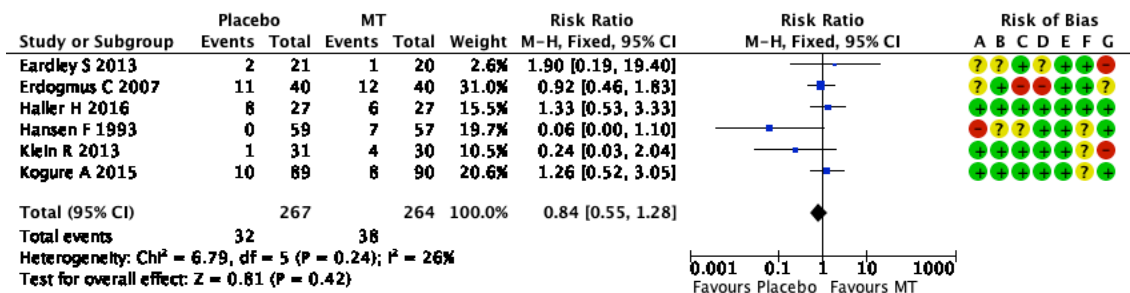

Risk of bias legend  
 (A) Random sequence generation (selection bias)  
 (B) Allocation concealment (selection bias)  
 (C) Blinding of participants and personnel (performance bias)  
 (D) Blinding of outcome assessment (detection bias)  
 (E) Incomplete outcome data (attrition bias)  
 (F) Selective reporting (reporting bias)  
 (G) Other bias

**Figure 5:** Forest plot of comparison Placebo versus MT in number of adverse events outcome at short-term

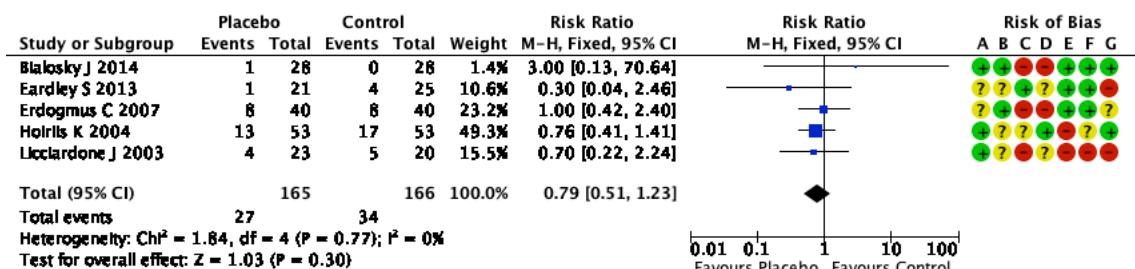

**Risk of bias legend**  
 (A) Random sequence generation (selection bias)  
 (B) Allocation concealment (selection bias)  
 (C) Blinding of participants and personnel (performance bias)  
 (D) Blinding of outcome assessment (detection bias)  
 (E) Incomplete outcome data (attrition bias)  
 (F) Selective reporting (reporting bias)  
 (G) Other bias

**Figure 6:** Forest plot of comparison Placebo versus MT in number of dropouts outcome

## Appendix 1: search strategy

### Medline

1. Mesh descriptor: [Back Pain] explode all trees
2. dorsalgia/
3. backache
- 4.(neck OR cervical) adj1 pain → Mesh
5. exp Brachial Plexus Neuropaties
6. exp Lumbar Plexus Neuropaties
7. Neck Pain/
8. neckache
9. Torticollis/
10. whiplash.mp
11. cervicodynia.mp
12. spondylitis/ OR spondylosis/ OR spondylolysis/ OR spondylolysthesis
- 13.(lumbar OR dorsal OR neck OR cervical OR sciatica) adj2 (pain OR ache)
14. (lumbar OR dorsal OR neck OR cervical) adj2 (discitis OR disc adj 1 herniation OR disc adj1 herniation)
15. 1 OR 2 OR 3 OR 4 OR 5 OR 6 OR 7 OR 8 OR 9 OR 10 OR 11 OR 12 OR 13 OR 14
16. (PLACEBO\* or MOCK\* or SHAM\* or FAKE\* or VEHICLE\* or DUMM\* or ATTENTION\* CONTROL\* or PSEUDO\* TREAT\* or UN?SPECIFIC\* or NON?SPECIFIC\* OR simulat\$ treatment OR inert agent)
17. Chiropractic/
18. Manipulation, Chiropractic/
19. chiropract\$.tw.
20. (manual adj2 therap\$).mp
21. spinal manipulation.mp. or Manipulation, Spinal/
22. osteopath\$.tw.
23. Osteopathic Medicine/
24. Physical Therapy Modalities/ or "Physical Therapy (Specialty)"/ or physical therap\$.tw. or physiotherap\$.tw.
25. myotherapy.mp
26. shiatsu.mp
- 27.exp Therapeutic Touch/
28. exp Massage/
29. (neuromuscular adj therapy).mp
30. 17 OR 18 OR 19 OR 20 OR OR 21 OR 22 OR 23 OR 24 OR 25 OR 26 OR 27 OR 28 OR 29
31. pain
32. range of motion
33. ROM
34. 31 OR 32 OR 33
35. Clinical Trial/
36. Randomized Controlled Trial/
37. controlled clinical trial/
38. exp RANDOMIZATION/
39. PLACEBO/
40. (random\$ adj2 allocat\$).tw.
41. single blind\$.tw.

- 1
- 2
- 3 42. double blind\$.tw.
- 4 43. placebo\$.tw.
- 5 44. 35 OR 36 OR 37 OR 38 OR 39 OR 40 OR 41 OR 42 OR 43
- 6
- 7 45. animals/
- 8 46. humans/
- 9 47. 46 NOT 45
- 10 48. 15 AND 16 AND 30 AND 44 AND 47
- 11
- 12
- 13
- 14
- 15
- 16
- 17
- 18
- 19
- 20
- 21
- 22
- 23
- 24
- 25
- 26
- 27
- 28
- 29
- 30
- 31
- 32
- 33
- 34
- 35
- 36
- 37
- 38
- 39
- 40
- 41
- 42
- 43
- 44
- 45
- 46
- 47
- 48
- 49
- 50
- 51
- 52
- 53
- 54
- 55
- 56
- 57
- 58
- 59
- 60

For peer review only



**Appendix 2:** data extraction form

|                      |                                                                                                                                                                                                                                                                                                                                                                                                                                                                                                                                                                           |
|----------------------|---------------------------------------------------------------------------------------------------------------------------------------------------------------------------------------------------------------------------------------------------------------------------------------------------------------------------------------------------------------------------------------------------------------------------------------------------------------------------------------------------------------------------------------------------------------------------|
| <b>Methods</b>       | <b>Trial Design</b><br><br><b>Settings</b>                                                                                                                                                                                                                                                                                                                                                                                                                                                                                                                                |
| <b>Participants</b>  | <b>Total number of participants:</b><br><br><b>Age:</b><br><br><b>Gender(M/F):</b><br><br><b>BMI:</b><br><br><b>Activity:</b><br><br><b>Duration of the symptoms:</b><br><br><b>Location of pain (one-sided, double-sided, central, cervical, dorsal or lumbar):</b><br><br><b>Cause of pain: (e.g. disc herniation, contractures, aspecific pain)</b><br><br><b>Previous experience of the treatment provided: Y/N/ N/A</b><br><br><b>Inclusion and exclusion Criteria:</b><br><br><b>VAS:</b><br><br><b>Practitioner characteristics: (years of experience, gender)</b> |
| <b>Interventions</b> | <b>Placebo:</b><br><br><b>Comparator:</b>                                                                                                                                                                                                                                                                                                                                                                                                                                                                                                                                 |
| <b>Outcomes</b>      | <b>Outcomes used in the meta-analysis:</b><br><br><b>Length of follow-up:</b>                                                                                                                                                                                                                                                                                                                                                                                                                                                                                             |
| <b>Notes</b>         | <b>Difference between Placebo and active treatment:</b><br><br><b>Placebo check for reliability:</b>                                                                                                                                                                                                                                                                                                                                                                                                                                                                      |

1  
2  
3  
4  
5  
6  
7  
8  
9  
10  
11  
12  
13  
14  
15  
16  
17  
18  
19  
20  
21  
22  
23  
24  
25  
26  
27  
28  
29  
30  
31  
32  
33  
34  
35  
36  
37  
38  
39  
40  
41  
42  
43  
44  
45  
46  
47  
48  
49  
50  
51  
52  
53  
54  
55  
56  
57  
58  
59  
60

|  |                           |
|--|---------------------------|
|  | <b>Adverse event:</b>     |
|  | <b>Lost to follow-up:</b> |
|  | <b>Funding source:</b>    |

For peer review only

**Appendix 3:** funnel plot of pain outcome with the inclusion (A) and with the exclusion (B) of two studies of Erdogmus C and Krekoukias G.

(A)

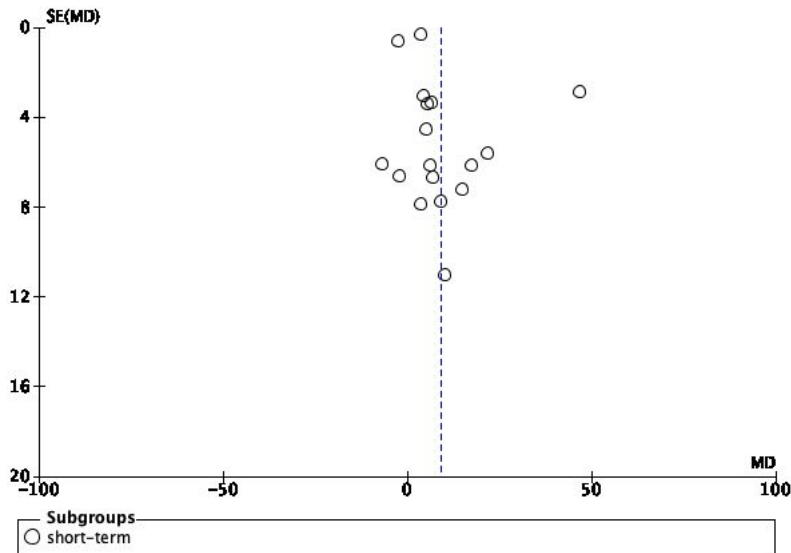

(B)

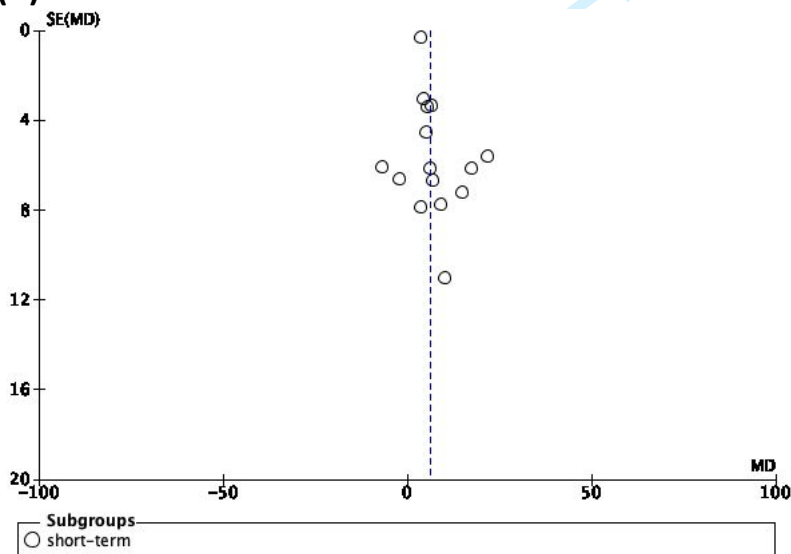

**Appendix 4:** forest plot of comparison pain outcome placebo vs manual therapies with the inclusion of two trials (Erdogmus C and Krekoukias G) at short, medium and long-term.

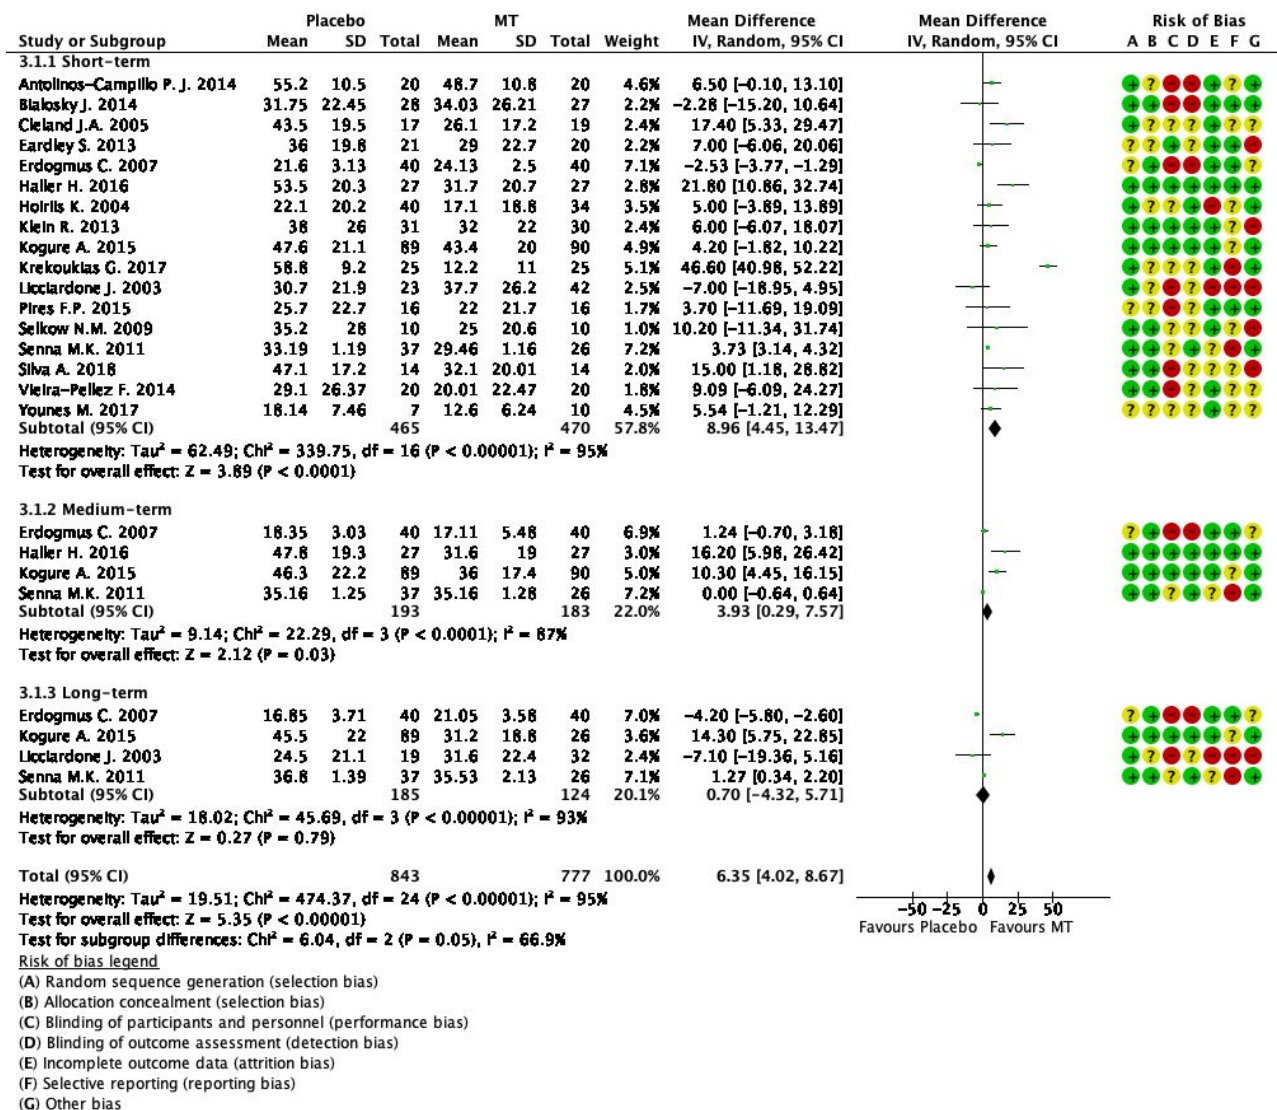

**Appendix 4.1:** Sensitivity analysis with the exclusion of Ergogmus C and Krekoukias G at short, medium and long-term

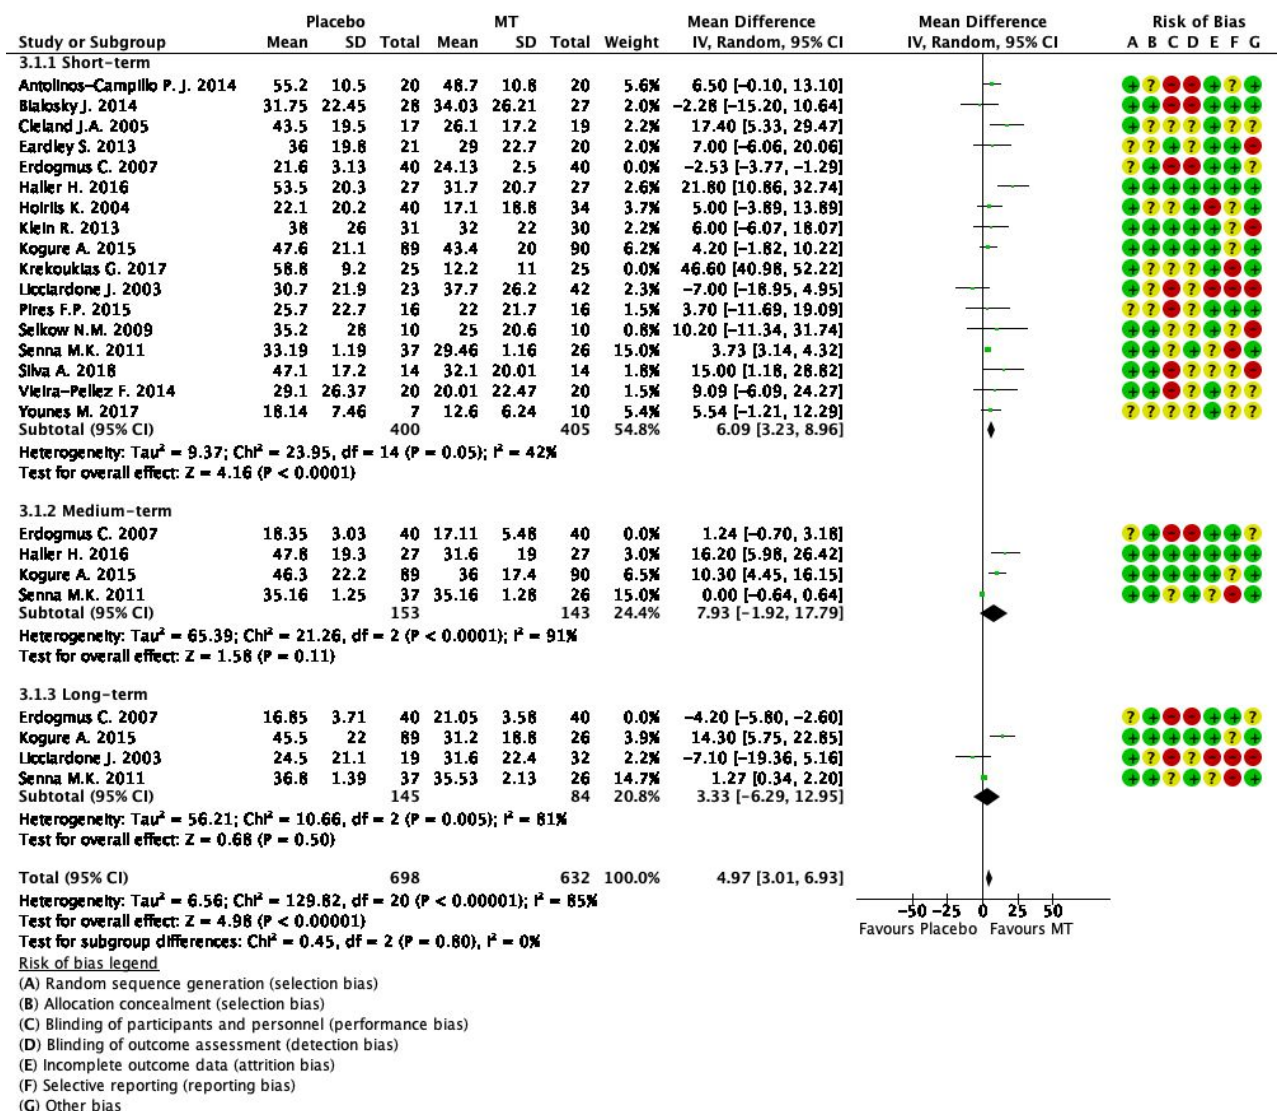

**Appendix 5:** forest plot of comparison Placebo versus control in back pain outcome at short-term with exclusion of Erdogmus C 2007 trial

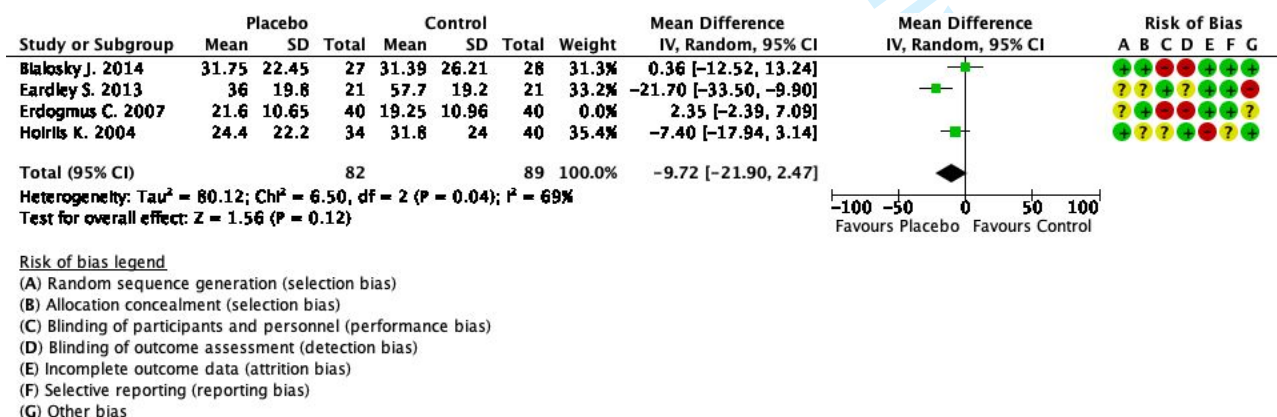

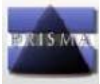

# PRISMA 2009 Checklist

| Section/topic                      | #  | Checklist item                                                                                                                                                                                                                                                                                              | Reported on page # |
|------------------------------------|----|-------------------------------------------------------------------------------------------------------------------------------------------------------------------------------------------------------------------------------------------------------------------------------------------------------------|--------------------|
| <b>TITLE</b>                       |    |                                                                                                                                                                                                                                                                                                             |                    |
| Title                              | 1  | Identify the report as a systematic review, meta-analysis, or both.                                                                                                                                                                                                                                         | Page 1             |
| <b>ABSTRACT</b>                    |    |                                                                                                                                                                                                                                                                                                             |                    |
| Structured summary                 | 2  | Provide a structured summary including, as applicable: background; objectives; data sources; study eligibility criteria, participants, and interventions; study appraisal and synthesis methods; results; limitations; conclusions and implications of key findings; systematic review registration number. | Page 5             |
| <b>INTRODUCTION</b>                |    |                                                                                                                                                                                                                                                                                                             |                    |
| Rationale                          | 3  | Describe the rationale for the review in the context of what is already known.                                                                                                                                                                                                                              | Pages 9-10         |
| Objectives                         | 4  | Provide an explicit statement of questions being addressed with reference to participants, interventions, comparisons, outcomes, and study design (PICOS).                                                                                                                                                  | Page 10            |
| <b>METHODS</b>                     |    |                                                                                                                                                                                                                                                                                                             |                    |
| Protocol and registration          | 5  | Indicate if a review protocol exists, if and where it can be accessed (e.g., Web address), and, if available, provide registration information including registration number.                                                                                                                               | Pages 6 and 10     |
| Eligibility criteria               | 6  | Specify study characteristics (e.g., PICOS, length of follow-up) and report characteristics (e.g., years considered, language, publication status) used as criteria for eligibility, giving rationale.                                                                                                      | Pages 10-11        |
| Information sources                | 7  | Describe all information sources (e.g., databases with dates of coverage, contact with study authors to identify additional studies) in the search and date last searched.                                                                                                                                  | Page 11            |
| Search                             | 8  | Present full electronic search strategy for at least one database, including any limits used, such that it could be repeated.                                                                                                                                                                               | Appendix 1         |
| Study selection                    | 9  | State the process for selecting studies (i.e., screening, eligibility, included in systematic review, and, if applicable, included in the meta-analysis).                                                                                                                                                   | Page 12            |
| Data collection process            | 10 | Describe method of data extraction from reports (e.g., piloted forms, independently, in duplicate) and any processes for obtaining and confirming data from investigators.                                                                                                                                  | Page 12            |
| Data items                         | 11 | List and define all variables for which data were sought (e.g., PICOS, funding sources) and any assumptions and simplifications made.                                                                                                                                                                       | Page 12-13         |
| Risk of bias in individual studies | 12 | Describe methods used for assessing risk of bias of individual studies (including specification of whether this was done at the study or outcome level), and how this information is to be used in any data synthesis.                                                                                      | Page 12            |
| Summary measures                   | 13 | State the principal summary measures (e.g., risk ratio, difference in means).<br>For peer review only - <a href="http://bmjopen.bmj.com/site/about/guidelines.xhtml">http://bmjopen.bmj.com/site/about/guidelines.xhtml</a>                                                                                 | Pages 12-13        |



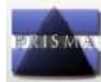

# PRISMA 2009 Checklist

1  
2  
3  
4  
5  
6  
7  
8  
9  
10  
11  
12  
13  
14  
15  
16  
17  
18  
19  
20  
21  
22  
23  
24  
25  
26  
27  
28  
29  
30  
31  
32  
33  
34  
35  
36  
37  
38  
39  
40  
41  
42  
43  
44  
45  
46  
47

|                      |    |                                                                                                                                                           |         |
|----------------------|----|-----------------------------------------------------------------------------------------------------------------------------------------------------------|---------|
| Synthesis of results | 14 | Describe the methods of handling data and combining results of studies, if done, including measures of consistency (e.g., $I^2$ ) for each meta-analysis. | Page 13 |
|----------------------|----|-----------------------------------------------------------------------------------------------------------------------------------------------------------|---------|

Page 1 of 2

| Section/topic                                                                                                                              | #  | Checklist item                                                                                                                                                                                           | Reported on page #         |
|--------------------------------------------------------------------------------------------------------------------------------------------|----|----------------------------------------------------------------------------------------------------------------------------------------------------------------------------------------------------------|----------------------------|
| Risk of bias across studies                                                                                                                | 15 | Specify any assessment of risk of bias that may affect the cumulative evidence (e.g., publication bias, selective reporting within studies).                                                             | Pages 12-13                |
| Additional analyses                                                                                                                        | 16 | Describe methods of additional analyses (e.g., sensitivity or subgroup analyses, meta-regression), if done, indicating which were pre-specified.                                                         | Page 13                    |
| <b>RESULTS</b>                                                                                                                             |    |                                                                                                                                                                                                          |                            |
| Study selection                                                                                                                            | 17 | Give numbers of studies screened, assessed for eligibility, and included in the review, with reasons for exclusions at each stage, ideally with a flow diagram.                                          | Page 15                    |
| Study characteristics                                                                                                                      | 18 | For each study, present characteristics for which data were extracted (e.g., study size, PICOS, follow-up period) and provide the citations.                                                             | Pages 16-19                |
| Risk of bias within studies                                                                                                                | 19 | Present data on risk of bias of each study and, if available, any outcome level assessment (see item 12).                                                                                                | Page 20, figure 2          |
| Results of individual studies                                                                                                              | 20 | For all outcomes considered (benefits or harms), present, for each study: (a) simple summary data for each intervention group (b) effect estimates and confidence intervals, ideally with a forest plot. | Pages 21-23                |
| Synthesis of results                                                                                                                       | 21 | Present results of each meta-analysis done, including confidence intervals and measures of consistency.                                                                                                  | Pages 7-8                  |
| Risk of bias across studies                                                                                                                | 22 | Present results of any assessment of risk of bias across studies (see Item 15).                                                                                                                          | Pages 20-figures 2,3,4,5,6 |
| Additional analysis                                                                                                                        | 23 | Give results of additional analyses, if done (e.g., sensitivity or subgroup analyses, meta-regression [see Item 16]).                                                                                    | Appendices 4-6             |
| <b>DISCUSSION</b>                                                                                                                          |    |                                                                                                                                                                                                          |                            |
| Summary of evidence                                                                                                                        | 24 | Summarize the main findings including the strength of evidence for each main outcome; consider their relevance to key groups (e.g., healthcare providers, users, and policy makers).                     | Pages 7-8, 24              |
| Limitations                                                                                                                                | 25 | Discuss limitations at study and outcome level (e.g., risk of bias), and at review-level (e.g., incomplete retrieval of identified research, reporting bias).                                            | Page 25                    |
| Conclusions                                                                                                                                | 26 | Provide a general interpretation of the results in the context of other evidence, and implications for future research.                                                                                  | Page 26                    |
| <b>FUNDING</b>                                                                                                                             |    |                                                                                                                                                                                                          |                            |
| For peer review only - <a href="http://bmjopen.bmj.com/site/about/guidelines.xhtml">http://bmjopen.bmj.com/site/about/guidelines.xhtml</a> |    |                                                                                                                                                                                                          |                            |

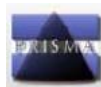

# PRISMA 2009 Checklist

|         |    |                                                                                                                                            |        |
|---------|----|--------------------------------------------------------------------------------------------------------------------------------------------|--------|
| Funding | 27 | Describe sources of funding for the systematic review and other support (e.g., supply of data); role of funders for the systematic review. | Page 2 |
|---------|----|--------------------------------------------------------------------------------------------------------------------------------------------|--------|

From: Moher D, Liberati A, Tetzlaff J, Altman DG, The PRISMA Group (2009). Preferred Reporting Items for Systematic Reviews and Meta-Analyses: The PRISMA Statement. PLoS Med 6(6): e1000097. doi:10.1371/journal.pmed1000097

For more information, visit: [www.prisma-statement.org](http://www.prisma-statement.org).

Page 2 of 2

For peer review only



# BMJ Open

## Sham treatment effects in manual therapy trials on back pain patients: a systematic review and pair-wise meta-analysis

|                                 |                                                                                                                                                      |
|---------------------------------|------------------------------------------------------------------------------------------------------------------------------------------------------|
| Journal:                        | <i>BMJ Open</i>                                                                                                                                      |
| Manuscript ID                   | bmjopen-2020-045106.R1                                                                                                                               |
| Article Type:                   | Original research                                                                                                                                    |
| Date Submitted by the Author:   | 04-Feb-2021                                                                                                                                          |
| Complete List of Authors:       | Lavazza, Carolina; AIMO, Research<br>Galli, Margherita; AIMO, Research<br>Abenavoli, Alessandra; AIMO, Research<br>Maggiani, Alberto; AIMO, Research |
| <b>Primary Subject Heading</b>: | Complementary medicine                                                                                                                               |
| Secondary Subject Heading:      | Research methods                                                                                                                                     |
| Keywords:                       | COMPLEMENTARY MEDICINE, STATISTICS & RESEARCH METHODS, Back pain < ORTHOPAEDIC & TRAUMA SURGERY                                                      |
|                                 |                                                                                                                                                      |

SCHOLARONE™  
Manuscripts



I, the Submitting Author has the right to grant and does grant on behalf of all authors of the Work (as defined in the below author licence), an exclusive licence and/or a non-exclusive licence for contributions from authors who are: i) UK Crown employees; ii) where BMJ has agreed a CC-BY licence shall apply, and/or iii) in accordance with the terms applicable for US Federal Government officers or employees acting as part of their official duties; on a worldwide, perpetual, irrevocable, royalty-free basis to BMJ Publishing Group Ltd ("BMJ") its licensees and where the relevant Journal is co-owned by BMJ to the co-owners of the Journal, to publish the Work in this journal and any other BMJ products and to exploit all rights, as set out in our [licence](#).

The Submitting Author accepts and understands that any supply made under these terms is made by BMJ to the Submitting Author unless you are acting as an employee on behalf of your employer or a postgraduate student of an affiliated institution which is paying any applicable article publishing charge ("APC") for Open Access articles. Where the Submitting Author wishes to make the Work available on an Open Access basis (and intends to pay the relevant APC), the terms of reuse of such Open Access shall be governed by a Creative Commons licence – details of these licences and which [Creative Commons](#) licence will apply to this Work are set out in our licence referred to above.

Other than as permitted in any relevant BMJ Author's Self Archiving Policies, I confirm this Work has not been accepted for publication elsewhere, is not being considered for publication elsewhere and does not duplicate material already published. I confirm all authors consent to publication of this Work and authorise the granting of this licence.

|                                                                                                                                                                                                                                                                                                                                                                                          |                                                                                                                                                                                                                                                                                                                                                                                                                                                                                      |
|------------------------------------------------------------------------------------------------------------------------------------------------------------------------------------------------------------------------------------------------------------------------------------------------------------------------------------------------------------------------------------------|--------------------------------------------------------------------------------------------------------------------------------------------------------------------------------------------------------------------------------------------------------------------------------------------------------------------------------------------------------------------------------------------------------------------------------------------------------------------------------------|
| <p><b>Title</b></p>                                                                                                                                                                                                                                                                                                                                                                      | <p>Sham treatment effects in manual therapy trials on back pain patients: a systematic review and pair-wise meta-analysis</p>                                                                                                                                                                                                                                                                                                                                                        |
| <p><b>Author's name</b></p>                                                                                                                                                                                                                                                                                                                                                              | <p>Carolina Lavazza (0000-0002-9907-6819), Margherita Galli (0000-0003-4050-3131), A Abenavoli (0000-0001-8941-2308), A Maggiani (0000-0002-7980-9405)</p>                                                                                                                                                                                                                                                                                                                           |
| <p><b>Address for each author</b><br/>         Separate each part of address with a comma (don't use a separate line for each part)<br/>         Please include postcodes<br/> <b>Authors' names and positions</b><br/>         Use same style of name as below title Please give one job position for each author, (under the relevant address) on separate line from author's name</p> | <p>Department of Research AIMO institute, Piazzale Santuario 7, 21047 Saronno, Italy, Carolina Lavazza associate professor, Department of Research AIMO institute, Piazzale Santuario 7, 21047 Saronno, Italy, Margherita Galli associate professor, Department of Research AIMO institute, Piazzale Santuario 7, 21047 Saronno, Italy, A Abenavoli associate professor, Department of Research AIMO institute, Piazzale Santuario 7, 21047 Saronno, Italy, A Maggiani professor</p> |
| <p><b>Corresponding author</b></p>                                                                                                                                                                                                                                                                                                                                                       | <p>Correspondence to:<br/>         carolina.lavazza@docenti.aimoedu.it</p>                                                                                                                                                                                                                                                                                                                                                                                                           |

**Copyright/license for publication:**

Carolina Lavazza The Corresponding Author of this article contained within the original manuscript which includes any diagrams & photographs within and any related or stand alone film submitted ("the Contribution") has the right to grant on behalf of all authors and does grant on behalf of all authors, a licence to the BMJ Publishing Group Ltd and its licencees, to permit this Contribution (if accepted) to be published in the BMJ and any other BMJ Group products and to exploit all subsidiary rights, as set out in our licence set out at:

<http://www.bmj.com/about-bmj/resources-authors/forms-policies-and-checklists/copyright-open-access-and-permission-reuse>.

Please tick **one or more** boxes as appropriate:

- I am the sole author of the Contribution.
- I am one author signing on behalf of all co-owners of the Contribution.
- The Contribution has been made in the course of my employment and I am signing as authorised by my employer.
- I am a US Federal Government employee acting in the course of my employment.
- I am not a US Federal Government employee, but some or all of my co-authors are.
- I am an employee of the UK Crown\* acting in the course of my employment
- I am a US Federal Government employee acting in the course of my employment.
- I am not a US Federal Government employee, but some or all of my co-authors are.
- I am an employee of the UK Crown acting in the course of my employment
- I am not an employee of the UK Crown acting in the course of my employment but some/all of my co-authors are.\*

\*Such authors should consult guidance and if necessary return any completed form.

**Licence:** The Corresponding Author has the right to grant on behalf of all authors and does grant on behalf of all authors, a worldwide licence to the Publishers and its licensees in perpetuity, in all forms, formats and media (whether known now or created in the future), to i) publish, reproduce, distribute, display and store the Contribution, ii) translate the Contribution into other languages, create adaptations, reprints, include within collections and create summaries, extracts and/or, abstracts of the Contribution, iii) create any other derivative work(s) based on the Contribution, iv) to exploit all subsidiary rights in the Contribution, v) the inclusion of electronic links from the Contribution to third party material where-ever it may be located; and, vi) licence any third party to do any or all of the above.

**Conflict of interest:** I have read and understood the BMJ Group policy on declaration of interests and declare the following interests: none

**Ethical approval:** not required.

**Transparency:** The manuscript's guarantor affirms that this manuscript is an honest, accurate, and transparent account of the study being reported; that no important aspects of the study have been omitted; and that any discrepancies from the study as planned (and, if relevant, registered) have been explained.

**Funding:** None.

1  
2  
3 **Competing interests:** No funding were provided for this project and authors did not received  
4 support from any organisation for the submitted work. Authors have no financial relationships  
5 with any organisations that might have an interest in this project and have no other  
6 relationships or activities that could appear to have influenced this review.  
7  
8  
9  
10  
11  
12  
13  
14  
15  
16  
17  
18  
19  
20  
21  
22  
23  
24  
25  
26  
27  
28  
29  
30  
31  
32  
33  
34  
35  
36  
37  
38  
39  
40  
41  
42  
43  
44  
45  
46  
47  
48  
49  
50  
51  
52  
53  
54  
55  
56  
57  
58  
59  
60

For peer review only

### Acronyms

AE= adverse effects

BP= back pain

CI= confidence intervals

CRB= Cochrane risk of bias

CT= clinical trial

MA = meta-analysis

MCID= minimal clinically important difference

MD=mean difference

MT= manual therapies

OMT = osteopathic manipulative treatment

PROs = patient-reported outcomes

RCT= randomised controlled trials

RR= risk ratio

SM= spinal manipulation

ST= sham treatment

## ABSTRACT

### Objective:

To assess the effects and reliability of sham procedures in manual therapy (MT) trials in the treatment of back pain (BP) in order to provide methodological guidance for clinical trial development.

**Design:** systematic review and meta-analysis

### Methods and analysis:

Different databases were screened up to 20 August 2020. RCT involving adults affected by BP (cervical and lumbar), acute or chronic, were included.

Hand contact sham treatment (ST) was compared to different MT (physiotherapy, chiropractic, osteopathy, massage, kinesiology and reflexology) and to control. Primary outcomes were BP improvement, success of blinding and adverse effect (AE). Secondary outcomes were number of dropouts. Dichotomous outcomes were analysed using risk ratio (RR), continuous using mean difference (MD), 95% confidence intervals (CI). The minimal clinically important difference was 30 mm changes in pain score.

### Results:

24 trials were included with 2,019 participants. Very low evidence quality suggests clinically insignificant pain improvement in favour of MT compared to ST (MD 3.86, 95% CI 3.29 to 4.43) and no differences between ST and control (MD -6.04, 95% CI -16.68 to 4.59).

ST reliability shows a high percentage of correct detection by participants (ranged from 46.7% to 83.5%), spinal manipulation being the most recognized technique.

Low quality of evidence suggests that AE and dropout rates were similar between ST and MT (RR AE=0.84, 95% CI 0.55 to 1.28, RR dropouts= 0.98, 95% CI 0.77 to 1.25). A similar dropout rate in control (RR=0.79, 95% 0.51 to 1.23).

### Conclusions:

Comparison of ST and MT shows a small, clinically meaningless effect in pain improvement. Similar effects were found with control. The heterogeneousness of sham MT studies and the very low quality of evidence render uncertain these review findings.

Future trials should develop reliable kinds of ST, similar to active treatment, to ensure participant-blinding and to guarantee proper sample size for the reliable detection of clinically meaningful treatment effects.

**PROSPERO register:** CRD42020198301

[https://www.crd.york.ac.uk/prospERO/display\\_record.php?RecordID=198301](https://www.crd.york.ac.uk/prospERO/display_record.php?RecordID=198301)

1  
2  
3  
4  
5  
6  
7  
8  
9  
10  
11  
12  
13  
14  
15  
16  
17  
18  
19  
20  
21  
22  
23  
24  
25  
26  
27  
28  
29  
30  
31  
32  
33  
34  
35  
36  
37  
38  
39  
40  
41  
42  
43  
44  
45  
46  
47  
48  
49  
50  
51  
52  
53  
54  
55  
56  
57  
58  
59  
60

## Strengths and limitations of this study

### Strengths

This systematic review and pair-wise meta-analysis:

- summarises existing evidence on the effectiveness, reliability and application of hand contact sham treatment in MT randomised controlled trials;
- gives suggestions for researchers on conducting methodical RCT in MT using a reliable sham procedure.

### Limitation

- This study did not include a comparison with machine provided placebo, its aim focused on hand contact sham treatment
- Insufficient number of studies were included to conduct a network meta-analysis

For peer review only



## Background

In Clinical Trials (CT), placebo is commonly used as a control therapy to evaluate clinical effectiveness of the treatments tested. (1) Placebo has been defined as “an inert substance or sham procedure that is provided to research participants with the aim of making it impossible for them, and usually the researchers themselves, to know who is receiving an active or inactive intervention.” (2)

In Europe, its use in pharmacological CT has been regulated by CT Regulation No. 536/2014. According to this regulation, placebo must be treated as an Investigatory Medical Product (IMP) and as such it has to follow different standards in order to ensure quality, guarantee patient safety and the reliability of study results.(3)

Regulatory aspects of trials involving Manual Therapies (MT) are very different. Although such studies might be influenced by the type of placebo provided, no clear guidelines or regulations have been developed to ensure the credibility of trial results and patient safety.

MT is a clinical approach used by different physical therapists and involves hands-on techniques to manipulate, mobilise and massage the body tissues. This type of therapy can help to relieve pain and stiffness, promote relaxation of soft-tissues, enhancing blood supply to tissues and increase mobility of joint structures. (4)

In MT trials, placebo treatment is often provided in different modalities from trial to trial although the manual techniques or treatments tested are the same. For instance, placebo treatment is commonly administrated as a light touch in the site of pain or as an active treatment in a different site (5), with no clear criterion. Such light touch might in fact have a health effect and there is no evidence as to its ineffectiveness. Touch itself could have a positive outcome on health (6) and active treatments could have an analgesic reflex on pain even if administered anywhere in the body.(7)

Placebo effect, also called placebo response, is the reported improvement in symptoms among patients that occurs as a result of the placebo administration. Since a placebo has no inherent therapeutic power, it rarely cures the disease but it may contribute to the relief of patients' symptoms such as pain.(8) Additionally, placebo might be related to an adverse effect called nocebo. It has been estimated that up to 26% of patients in randomized control trials (RCTs) discontinue placebo due to adverse effects.(9)

It is thought that these psychobiological phenomena may be related to the overall therapeutic context, such as treatment environment, individual patient and clinician factors (e.g. beliefs, desire for symptom changes), as well as the patient's expectations of improvement and prior experiences of the treatment. (10-13)

In pharmacological trials this overall therapeutic context and its influence on placebo response has been widely studied. (11) Less evidence is present for MT trials, where other important characteristics should be considered as part of this therapeutic context such as the tactile interaction between patient and practitioner and clinician beliefs. (14, 15) Pharmacological trials avoid the influence of clinicians' beliefs by using a placebo that ensures both patients and clinicians blinding to treatment allocation, but, in MT trials, the blinding of clinicians is almost impossible to achieve. The best alternative in this type of trial is the use of a sham treatment that mimics the active treatment and aims to ensure at least the blinding of participants.

Another important factor that has to be taken into account is that RCTs involving MT usually use patient-reported outcomes (PROs) - such as pain - as primary outcomes. Studies suggested that physical placebo treatments might have a greater effect on these types of outcome compared to pharmacological placebo and that this effect might be a consequence of physical contact.

Moreover, especially when subjective PROs outcomes are used, the lack of clinician blinding could also increase the possibility of performance bias. (14)

Therefore, a better understanding of placebo procedures in manual treatment would be fundamental to define the real difference in efficacy between manual and sham treatment, with a better knowledge of the effect of manual contact on PROs such as pain relief and dropouts.

The role of placebo – referred to as sham therapy in this review - in MT trials is still very confused and the lack of guidelines allows huge discrepancies in its use in RCTs. Additionally, the reliability of sham procedures in MT trials has been rarely evaluated.

A clear definition of placebo effect could improve trial design, implementing studies with a proper power and sample size, defining clinical relevance of MT and giving more reliability to study results.

The aim of this systematic review with pair-wise meta-analyses (MA) is to evaluate the use of placebo in MT trials in order to analyse the effects, possible harm and the reliability of different kinds of sham treatments provided in RCTs involving MT. A systematic review could help to define placebo standards to be applied in CT in order to guarantee methodological quality and patient safety.

### Objective

To assess the benefits, potential harm and reliability of sham treatment in manual therapy (MT) randomized controlled trials in the treatment of back pain (BP) both cervical and lumbar in order to provide methodological guidance for clinical trial development.

## Methods

This systematic review and meta-analysis was performed following the Preferred Reporting Items for Systematic Reviews (PRISMA)(16).

The protocol registration was performed in PROSPERO (<http://www.crd.york.ac.uk/PROSPERO/>) and review registration number is **CRD42020198301**.

### Criteria for considering studies for this review

Only randomised controlled studies (RCTs) were included in this review. Quasi-randomised trials in which allocation was not strictly random (e.g. date of birth or toss of a coin) were excluded. No restrictions were applied to language or setting.

Studies were considered eligible if they included adult participants with acute or chronic back pain including coccyx, lumbar, dorsal and cervical. Trials where pain is related to muscular conditions, articular disorders (such as osteoarthritis) or spinal disc herniation were included. Trials where musculoskeletal diseases were secondary to other pathologies (e.g. amyotrophic lateral sclerosis, fibromyalgia etc.) were excluded.

1  
2  
3 Trials where pain was related to fracture, surgery, dysmenorrhoea, post-partum or pregnancy,  
4 headache or dizziness were excluded.

5 This review involved all types of placebo that include **hand contact** provided by all kinds of  
6 physical therapists. Studies where placebo was provided by machines (such as inactive  
7 ultrasound) were excluded.

8 All trials that involved hand contact ST as light touch or a manual treatment in a different site  
9 were included.

10 ST was compared to other manual therapies such as: physiotherapy, chiropractic, osteopathy,  
11 massage, kinesiology and reflexology and to control.

12 To assess if touch itself could have a positive health effect, ST was also compared to control.  
13 Physiotherapeutic exercises were included in the analysis only if associated with manual  
14 treatment.

15 The use of active co-interventions such as oral NSAIDs or other active treatments was accepted  
16 if used in all trial arms. Trials with more than two arms of intervention were included, but only  
17 data of interested arms were extracted.

## 23 24 **Outcomes**

25  
26 Primary outcomes were pain intensity on a validated scale, success of blinding of and adverse  
27 effect. Secondary outcomes were number of dropouts.

28 Whenever the meta-analysis could not be performed, a narrative summary of the outcomes  
29 have been provided. Outcomes were divided into short ( $\leq 2$  months), medium ( $\leq 4$  months) and  
30 long-term ( $\geq 6$  months). Data were extracted and analysed based on the time closest to these  
31 intervals.  
32  
33

## 34 35 36 **Information sources**

37  
38 Search strategy (**Appendix 1**) was adapted to the different databased by an experienced  
39 information specialist.

40 RCTs were identified in different databases (up to 20 August 2020): MEDLINE, Embase, CINAHL,  
41 SPORTDiscus, PEDro, World Health Organization Clinical Trials Registration Platform , Index to  
42 Chiropractic Literature, Cochrane central register of controlled trials (CENTRAL), Clinical trials  
43 registry and metaRegister of Controlled Trials (mRCT).

44 Researchers of unpublished trials, but completed and registered, were contacted by *CL* to  
45 obtain data.  
46  
47

48  
49 The search in PROSPERO, in the Cochrane Library and in PubMed (clinical queries) was  
50 performed to evaluate the presence of on-going or recently completed systematic reviews.  
51 Guidelines from different organizations (e.g. National Council for Osteopathic Research etc.)  
52 were reviewed and references from relevant publication were analysed.  
53  
54  
55  
56  
57  
58  
59  
60

1  
2  
3  
4  
5  
6  
7  
8  
9  
10  
11  
12  
13  
14  
15  
16  
17  
18  
19  
20  
21  
22  
23  
24  
25  
26  
27  
28  
29  
30  
31  
32  
33  
34  
35  
36  
37  
38  
39  
40  
41  
42  
43  
44  
45  
46  
47  
48  
49  
50  
51  
52  
53  
54  
55  
56  
57  
58  
59  
60

### **Data collection and analysis**

Searches results were screened by two independent reviewers who identified all the potentially eligible trials based on title and abstract. Full-texts of all the selected articles were screened firstly for inclusion. If full-text was not available, or the trial was completed but not published, *CL* contacted the authors in order to obtain the information needed or the document delivery service of the 3Bi Biella library.

Uncertainty about the inclusion of a study were discussed by the two reviewers. If no agreement was reached by the two reviewers a third reviewer (*AM*) was asked for their opinion.

The selection process was recorded and reported through a PRISMA flow diagram.

### **Data extraction and management**

Data extraction was performed by two reviewers with a tested pre-defined form. Data extracted were related to settings, type of study, participants characteristics (such as localization and duration of pain, pain score at baseline, previous similar treatment), interventions, outcomes used in the meta-analysis and other relevant data such as difference in ST and active treatment or funding. (**Appendix 2**)

### **Risk of bias in individual studies**

Bias risk was assessed by *CL* and agreed by *MG* using the Cochrane Risk of bias (CRB) tool (27). This tool was used to assess selection bias, performance bias, attrition bias, reporting bias and other biases.

Each possible risk was evaluated as "high", "medium" or "low" by *CL* and a revision of the judgments was performed by *MG*. RevMan 5.3.5 was used for the graphic representation of each risk. The CRB tool results were then converted to AHRQ Standards to assess the quality of the study (Good, Fair, and Poor). Trials were judged as good quality when bias risk was judged as low, studies with fair quality were trials where at least one criterion was high risk, poor quality studies instead were trials with two or more criteria with high or unclear risk.

### **Assessment of reporting biases**

Funnel plots were created to explore reporting bias, whenever more than 10 studies were included in the meta-analysis. Furthermore, for each study, an analysis of possible conflicts of interest and funding sources was performed.

### **Summary measures**

Dichotomous outcomes, such as adverse events (occurred or not), were analysed using risk ratio (RR) with 95% confidence intervals (CI).

Continuous outcomes, such as back pain on VAS scale, were evaluated using mean difference (MD) between ST and the MT/control group with 95% CI and the standard deviation (SD).

The minimal clinically important difference (MCID) between pre- and post-treatment was taken as 30 mm changes in 100 mm pain score. (17-19) These values were used for the interpretation of the clinical significance of the findings.

10

1  
2  
3 Success of blinding was reported with a percentage of patients guessing correctly the treatment  
4 allocation.  
5 In this review the unit of analysis was the participant.  
6  
7  
8

### 9 **Assessment of heterogeneity**

10  
11 The presence of heterogeneity was assessed with a visual inspection of the forest plots and  
12 through an inconsistency level test ( $I^2$ ).  
13 Cochrane Handbook was used for threshold interpretation: heterogeneity was considered as  
14 unimportant for value of  $I^2$  between 0% and 40%, as moderate for values between 30% and  
15 60% , as substantial for values between 50% an 90% and considerable for values between 75%  
16 to 100%. (20)  
17  
18  
19

### 20 **Synthesis of results**

21  
22  
23 Meta-analysis of pain score, AE and dropout rates were performed using RevMan 5.3.5  
24 whenever possible. The meta-analyses compared all kinds of ST with all types of manual  
25 therapies and to control. Random-effect model was used when a substantial inconsistency was  
26 present ( $I^2= 50-90\%$ ). (20) When considerable heterogeneity was present ( $I^2>75\%$ ) and could  
27 not be explained by clinical or methodological diversity, the results have been presented  
28 narratively.  
29 The statistical significance of measured effects was determined evaluating the p-value and 95%  
30 CI.  
31  
32  
33  
34  
35

### 36 **Additional analyses**

37  
38 Different subgroup analyses were planned in the protocol such as on ST type provided (applied  
39 locally or in different sites from pain), type of manual technique tested (single or multiple  
40 techniques) and localization of back pain. However, due to the small number of studies  
41 included in this review, only a few subgroup analyses were conducted on follow-up periods.  
42  
43

44 Sensitivity analysis was conducted for the primary outcomes to assess the effects of skewed  
45 and imputed data on the effect measure. These analyses are reported as appendices.  
46  
47  
48

### 49 **Summarizing results and assessing the quality of the evidence**

50  
51 The quality of evidence for each outcome was evaluated with the GRADE approach by two  
52 independent authors and any disagreement was discussed. The quality for each effect measure  
53 was judged as high, moderate, low or very low.(21) The GRADE approach was used to assess  
54 the quality of the key outcomes. The software GRADEpro (<https://gradepr.org>) was used to  
55 import data from RevMan 5.3.5 and to create “summary of findings tables”.  
56 The following outcomes were chosen to be presented: pain scores at short-term, AE and  
57 dropouts.  
58  
59  
60

1  
2  
3  
4  
5  
6  
7  
8  
9  
10  
11  
12  
13  
14  
15  
16  
17  
18  
19  
20  
21  
22  
23  
24  
25  
26  
27  
28  
29  
30  
31  
32  
33  
34  
35  
36  
37  
38  
39  
40  
41  
42  
43  
44  
45  
46  
47  
48  
49  
50  
51  
52  
53  
54  
55  
56  
57  
58  
59  
60

## Patient and Public Involvement

There was no involvement of patients or public during the outline of this project. The differences noted between therapies tested on primary pain outcome were those clinically meaningful to patients.

## Results

### **Figure 1: PRISMA flow diagram**

### **Included studies**

**Table 1** shows a summary of main characteristics of included studies.

24 studies were included in this review (**Figure 1**), one study had a 2x2 factorial design, (22) eight studies had multiple arms. (23-30) Most of the studies were conducted in physical therapy clinics, in 13 different countries. Three trials did not report in which clinical setting they were conducted. (27, 31, 32)

Eight trials were conducted in Europe, (25, 26, 28, 33-37) five in the United States, (22, 23, 29, 38, 39) three studies in Brazil, (40-42) one in UK, (24) Egypt, (30) Japan (43) and Australia. (44) No ongoing or unpublished trials were found.

### **Population**

The included trials randomized a total of 2,019 participants, the majority of studies (N=18) were small with a median of 50 participants and a range from 15 to 455.

Most trials included middle aged patients (mean 39,9 range from 18 to 73) with a mean BMI of 21,7 kg/m<sup>2</sup>.

The majority of studies included both genders, with a percentage of male that ranged from 19% to 80%. Two trials included only male, (36, 42) one study included only female participants. (40)

16 trials enrolled participants with low back pain (LBP), nine included participants with cervical pain (CP).

The majority of trials (N=18) included participants with unspecified cause of back pain. Disk herniation was considered in three trials. (25, 28, 42)

Duration of symptoms were unassessed in eight trials, most of the studies included participants with chronic pain (N=9), some included participants with both acute and chronic pain.

Participants with experience of the tested treatment were included in 8 trials (22, 27, 29, 30, 33, 35, 40, 41) and excluded in four. (24, 34, 37, 39) Remaining studies did not provide this information.

## Interventions

Interventions deferred for number of sessions and number of techniques applied. Generally the trials used a single therapy session (N=11) with a single technique performed (N=8).

Trials with different therapy sessions ranged from 5(23, 24, 28) to 20 (25) sessions once a week.

## Sham treatment

ST was provided with a hand contact on the area of pain in 19 studies, five studies provided ST in a different area from where the pain was located. (25, 33, 41, 43, 44)

In trials providing spinal manipulation, as inactive treatment the majority of authors used the similar placement of hands on participants without any force applied. (38-40, 42)

Two trials used a ST with similar forces applied in different directions. (23, 30)

one trial did not specify the inactive manipulation applied. (27)

In trials that provided multiple techniques in the same treatment session (such as osteopathic treatment, spinal mobilization and physiotherapy) the ST was administrated with different techniques that mimed active treatments using light touch or light tractions.

Only one trial compared one single sham technique with both single active technique and multiple treatment techniques. In this case only data of the first arm were extracted. (35)

## Manual and controls treatments

Different manual treatments were provided:

- Physiotherapy (2 trials, 288 participants)
- Spinal manipulation (SM)/chiropractic (7 studies, 567 participants)
- Osteopathy (5 trials, 645 participants)
- Kinesiology (one trial, 58 participants)
- Articular mobilizations (5 trials, 325 participants)
- Muscular release (4 trials, 136 participants)

Five trials with multiple arms compared ST to control group (343 participants).

The manual treatment was generally applied in the area of pain, some trials used techniques additionally in other areas. Just one trial using reflexology provided both manual therapy and sham in a different zone. (37)

Characteristics of practitioner who administrated treatments were provided by 16 trials. Most of the trials involved physiotherapists (N=8), physical therapists (N=4), osteopaths (N=3) and students (N=1). Only seven studies provided information on years of practice experience of physicians involved that ranged from 6 to 17 years. (28, 31, 33-35, 38, 40, 42) The gender of practitioners was indicated in only three trials.(24, 28, 35)



**Table 1:** summary of main characteristics of included studies

| Study ID                     | N° of participants | Symptoms duration          | Pain localization | Technique tested ( <i>site of application</i> )           | Type of sham procedure                                       | Other arms                     | Follow-up                                                |
|------------------------------|--------------------|----------------------------|-------------------|-----------------------------------------------------------|--------------------------------------------------------------|--------------------------------|----------------------------------------------------------|
| Antonilos-Campillo PJ 2014   | 40                 | Not reported               | Cervical          | Soft-tissue ( <i>cervical region</i> )                    | Soft mobilization of lower limbs                             | None                           | No follow-up (outcomes collected after the intervention) |
| Bialosky J 2014              | 110                | > 4 months                 | Lumbar            | Spinal Manipulation (SM) ( <i>lumbar spine</i> )          | Ineffective force applied on lumbar spine                    | Control group                  | 2 weeks                                                  |
| Cleland JA 2005              | 36                 | >2 months                  | Cervical          | SM ( <i>thoracic spine</i> )                              | Ineffective force applied on thoracic spine                  | None                           | No follow-up (outcomes collected after the intervention) |
| Eardley S 2013               | 58                 | > 3 years                  | Lumbar            | Kinesiology ( <i>spine</i> )                              | Protocol of ineffective techniques in the site of pain       | Control group                  | 7 weeks                                                  |
| Erdogmus S 2007              | 120                | $\geq 1.4$ weeks           | Lumbar            | Physiotherapy ( <i>spine</i> )                            | Neck massage                                                 | Control group                  | 1.5 years                                                |
| Hall T 2004                  | 24                 | Not reported               | Lumbar            | BLR technique ( <i>lower limbs</i> )                      | Soft-tissue manipulation of the foot                         | None                           | 24 hours                                                 |
| Haller H 2016                | 54                 | > 7 months                 | Cervical          | Cranio-sacral therapy ( <i>head</i> )                     | Ineffective touch of head                                    | None                           | 3 months                                                 |
| Hansen F 1993                | 168                | $\geq 18$ days             | Lumbar            | Physiotherapy ( <i>lumbar spine and abdomen</i> )         | Intermittent traction of the spine                           | Intensive back muscle training | 1 year                                                   |
| Hidalgo B 2015               | 32                 | Not reported               | Lumbar            | Articular mobilization ( <i>lumbar spine</i> )            | Ineffective mobilization forces applied on lumbar spine      | None                           | 2 weeks                                                  |
| Hoiriis K 2004               | 156                | $\geq 2,3$ weeks           | Lumbar            | SM ( <i>spine</i> )                                       | Ineffective force applied on spine                           | Medical treatment              | 4 weeks                                                  |
| Klein R 2003                 | 61                 | >1 month and <5 years      | Cervical          | Strain-counterstrain techniques ( <i>cervical spine</i> ) | Ineffective force applied on cervical spine                  | None                           | No follow-up (outcomes collected after the intervention) |
| Kogure A 2015                | 179                | > 12 months and < 10 years | Lumbar            | AKA-H ( <i>sacro-iliac joint</i> )                        | Ineffective force applied on sacro-iliac joint               | None                           | 6 months                                                 |
| Krekoukias G 2017            | 50                 | Not reported               | Lumbar            | Articular mobilization techniques ( <i>lumbar spine</i> ) | Hand contact with lumbar skin placement without any movement | Exercise plus TENS             | 5 weeks                                                  |
| Lascurain-Aguirrebena I 2018 | 40                 | Not reported               | Cervical          | Articular mobilization ( <i>Cervical spine</i> )          | Ineffective force applied on cervical spine                  | None                           | No follow-up (outcomes collected after the intervention) |
| Licciardone J 2003           | 91                 | $\geq 3$ months            | Lumbar            | Osteopathic manual treatment (OMT) ( <i>all body</i> )    | Protocol of light touch techniques similar to OMT            | Control group                  | 6 months                                                 |



|                            |     |                  |          |                                                                                    |                                                                                                                       |               |                                                          |
|----------------------------|-----|------------------|----------|------------------------------------------------------------------------------------|-----------------------------------------------------------------------------------------------------------------------|---------------|----------------------------------------------------------|
|                            |     |                  |          |                                                                                    | applied to all body                                                                                                   |               |                                                          |
| <b>Licciardone J 2013</b>  | 455 | $\geq 3$ months  | Lumbar   | Osteopathic manual treatment (OMT) – ( <i>all body</i> )                           | Protocol of light touch techniques similar to OMT applied to all body                                                 | None          | 8 weeks                                                  |
| <b>Pires FP 2015</b>       | 32  | > 3 months       | Cervical | SM ( <i>thoracic spine</i> )                                                       | Ineffective force applied on thoracic spine                                                                           | None          | 72 hours                                                 |
| <b>Quinn F 2008</b>        | 15  | Not reported     | Lumbar   | Reflexology ( <i>foot</i> )                                                        | Foot massage with less pressure and in different reflex point (not related to the spine)                              | None          | 18 weeks                                                 |
| <b>Selkow M 2009</b>       | 20  | 1-6 weeks        | Lumbar   | Muscular energy technique ( <i>anterior superior iliac spine and lower limbs</i> ) | Practitioner hand positioned as active treatment but participant rested for 30 seconds without any active contraction | None          | 24 hours                                                 |
| <b>Senna MK 2011</b>       | 93  | $\geq 13$ months | Lumbar   | SM ( <i>lumbar spine</i> )                                                         | Ineffective force applied on lumbar spine                                                                             | Maintained SM | 10 months                                                |
| <b>Sillevis R 2010</b>     | 100 | $\geq 23$ months | Cervical | SM ( <i>thoracic spine</i> )                                                       | Ineffective force applied on thoracic spine                                                                           | None          | No follow-up (outcomes collected after the intervention) |
| <b>Silva A 2019</b>        | 28  | >3 months        | Cervical | Osteopathic visceral treatment ( <i>abdomen</i> )                                  | Hand contact on umbilical region without any movement                                                                 | None          | 7 days                                                   |
| <b>Veira-Pellez F 2014</b> | 40  | Not reported     | Lumbar   | SM ( <i>lumbar/sacral spine</i> )                                                  | Ineffective force applied on lumbar/sacral joints                                                                     | None          | No follow-up (outcomes collected after the intervention) |
| <b>Younes M 2017</b>       | 17  | < 3 months       | Lumbar   | OMT ( <i>all spine</i> )                                                           | Placebo mimed active treatment with an ineffective force applied.                                                     | None          | 7 days                                                   |

1  
2  
3  
4  
5  
6  
7  
8  
9  
10  
11  
12  
13  
14  
15  
16  
17  
18  
19  
20  
21  
22  
23  
24  
25  
26  
27  
28  
29  
30  
31  
32  
33  
34  
35  
36  
37  
38  
39  
40  
41  
42  
43  
44  
45  
46  
47  
48  
49  
50  
51  
52  
53  
54  
55  
56  
57  
58  
59  
60

## Risk of bias in included studies

**Figure 2** shows risks of bias.

Blinding of participants and assessors will be described due to the nature of this review.

According to AHRQ standards of CRB tool, (21) the majority of trials were judged with poor quality (N=22). Good quality was conferred on only two studies. (34, 43)

The random sequence and allocation concealment were adequately reported in 71% and 63% of trials respectively.

The lack of blinding of participants was the most common bias and was judged as high risk in 38% of studies, while 38% were considered as unclear risk.

The reasons for this judgment were mainly related to trials involving spinal manipulations.

These studies used a technique which can be easily recognized by patients as active treatment for the popping sound emitted by joints. Additionally, these trials involved participants who could have already received this type of treatment, making the masking of technique almost impossible.

Blinding of outcomes was evaluated mainly as unclear risk in 46% of trials. Only two trials reported the strategies adopted to guarantee assessor blinding. (26, 30)

Incomplete outcome data was the least common bias risk with 80% of trials judged as low risk.

Reporting bias was evaluated unclear in 55% of trials where registration number and trial protocol were not reported or found.

Other bias occurred was generally considered at high risk for baseline differences of the population in 30% of trials.

**Figure 2:** Risk of bias summary. Review authors' judgements about each risk of bias item for each included study.

## Effects of intervention

**Table 2** summaries treatment effects and GRADE quality of the evidence for all comparisons.

For peer review only

**Table 2:** summary of findings of treatment effects and certainty of the evidence (GRADE) included for all comparisons.

### 1. Sham treatment (ST) compared to Manual Therapies (MT)

Patient or population: back pain

Intervention: ST

Comparison: MT

| Outcomes                                                                         | Anticipated absolute effects* (95% CI) |                                                      | Relative effect (95% CI)         | No of participants (studies) | Certainty of the evidence (GRADE) | Comments                                                                                                                                                                                                                                                                            |
|----------------------------------------------------------------------------------|----------------------------------------|------------------------------------------------------|----------------------------------|------------------------------|-----------------------------------|-------------------------------------------------------------------------------------------------------------------------------------------------------------------------------------------------------------------------------------------------------------------------------------|
|                                                                                  | Risk with MT                           | Risk with ST                                         |                                  |                              |                                   |                                                                                                                                                                                                                                                                                     |
| <b>Pain improvement</b> assessed with: VAS score<br>Scale from: 0 to 100         |                                        | <b>MD 3.86 higher</b><br>(3.29 higher to 4.43 lower) | -                                | 805<br>(15 RCTs)             | ⊕○○○<br>VERY LOW <sup>a,b</sup>   | A small effect, not clinically relevant, in pain improvement was detected in favour of MT. This analysis excluded two trials (one suspected of publication bias, one used a different scale) which increased heterogeneity levels but did not affect overall efficacy meaningfully. |
| <b>Adverse events</b> assessed with: number of AE occurred                       | 144 per 1.000                          | <b>121 per 1.000</b><br>(79 to 184)                  | <b>RR 0.84</b><br>(0.55 to 1.28) | 531<br>(6 RCTs)              | ⊕⊕○○<br>LOW <sup>a</sup>          | Pooled data from 6 studies did not show any difference in AE occurrence between ST and MT.                                                                                                                                                                                          |
| <b>Dropouts rate</b> assessed with: number of participants that leaved the study | 174 per 1.000                          | <b>171 per 1.000</b><br>(134 to 218)                 | <b>RR 0.98</b><br>(0.77 to 1.25) | 1238<br>(11 RCTs)            | ⊕⊕○○<br>LOW <sup>a</sup>          | Pooled data from 11 trials did not show difference in dropout rate between ST and MT.                                                                                                                                                                                               |

### 2. ST compared to Control

Patient or population: back pain

Intervention: ST

Comparison: control

| Outcomes                                                                         | Anticipated absolute effects* (95% CI) |                                                      | Relative effect (95% CI)         | No of participants (studies) | Certainty of the evidence (GRADE) | Comments                                                                                                                   |
|----------------------------------------------------------------------------------|----------------------------------------|------------------------------------------------------|----------------------------------|------------------------------|-----------------------------------|----------------------------------------------------------------------------------------------------------------------------|
|                                                                                  | Risk with control                      | Risk with ST                                         |                                  |                              |                                   |                                                                                                                            |
| <b>Pain improvement</b> assessed with: VAS score<br>Scale from: 0 to 100         |                                        | <b>MD 6.04 lower</b><br>(16.68 lower to 4.59 higher) | -                                | 251<br>(4 RCTs)              | ⊕○○○<br>VERY LOW <sup>a,c,d</sup> | Pooled data from four trials, highly inconsistent, showed no differences between ST and control group in pain improvement. |
| <b>Dropouts rate</b> assessed with: number of participants that leaved the study | 205 per 1.000                          | <b>162 per 1.000</b><br>(104 to 252)                 | <b>RR 0.79</b><br>(0.51 to 1.23) | 331<br>(5 RCTs)              | ⊕○○○<br>VERY LOW <sup>a,d</sup>   | Very low quality of evidence suggests no differences in dropout rate between ST and control.                               |

\*The risk in the intervention group (and its 95% confidence interval) is based on the assumed risk in the comparison group and the relative effect of the intervention (and its 95% CI).

CI: Confidence interval; MD: Mean difference; RR: Risk ratio

**GRADE Working Group grades of evidence**

**High certainty:** We are very confident that the true effect lies close to that of the estimate of the effect

**Moderate certainty:** We are moderately confident in the effect estimate: The true effect is likely to be close to the estimate of the effect, but there is a possibility that it is substantially different

**Low certainty:** Our confidence in the effect estimate is limited: The true effect may be substantially different from the estimate of the effect

**Very low certainty:** We have very little confidence in the effect estimate: The true effect is likely to be substantially different from the estimate of effect

**Explanations**

- a. The majority of trials were judged as poor quality according to AHRQ standards.
- b. Most of the studies were small trial.
- c. Heterogeneity levels at 80%.
- d. Number of participants < 400

For peer review only

## Sham treatment versus other manual therapies

### Pain

The following outcomes on back pain are presented with a 100 mm visual analogue scale, 0 to 100; higher scores refer to worse pain. Trials using a 10mm scales were converted to 100mm scores.

The comparison between ST and MT was performed in 17 studies. One trial used a different scale and data were obtained with a conversion formula.(25) Data from seven studies could not be extracted.

The meta-analysis at short-term showed substantial heterogeneity levels using a random-effects model. To further investigate inconsistency levels, a sensitivity analysis excluding two trials was performed. One trial used a different validated scale, (25) while the other was suspected of publication bias.(28) This thought was verified with a funnel plot, which showed an asymmetric distribution with the inclusion of these two studies (**Appendix 3**). This sensitivity analysis did not influence overall effectiveness results but inconsistency levels decreased considerably at short-term. It can be deduced that a possible cause of heterogeneity was found (**Full analysis in appendix 4**).

The sensitivity analysis using a fixed-model at short-term showed a slight difference, not clinically meaningful, between ST and MT in favour of MT on pain outcome (MD 3.86, 95%CI 3.29 to 4.43, 805 participants,  $I^2=42%$ ,  $p<0.0001$ , very low quality of evidence downgraded two levels for very serious risk of bias and imprecision) (**Figure 3**).

**Figure 3:** Forest plot of comparison ST versus MT in back pain outcome at short-term.

Comparisons between ST and MT at medium and long-term could not be performed due to substantial levels of heterogeneity found using a random-effects model. The heterogeneity levels were not explainable by clinical or methodological diversities within trials (medium-term  $I^2=91%$   $P<0.0001$ , long-term  $I^2=81%$   $P=0.005$ ) (**Appendix 4.1**).

### Success of blinding

Success of blinding was evaluated in five trials; one did not report the results. (28)

Patients were asked to assess if they understood their treatment allocations. Due to the type of data extracted (percentage of correct guessing) meta-analysis was not performed and results are reported descriptively.

Two trials compared ST with SM, these trials showed a correct perception of treatment allocation that ranged from 63.5% (23) to 83.5%. (27) In this last study patients were considered eligible if they already received SM.

One trial compared ST to an articular mobilization technique. 54.5% participants correctly guessed treatment allocation. (44)

1  
2  
3 Participants of one study that compared ST to reflexology had the lowest perception of the  
4 correct detection of allocation (46.7%). Participants in this trials were naïve to the type of  
5 treatment tested. (37)  
6  
7

## 8 **Dropouts**

9

10 Pooled data from 11 trials at the last follow-up suggested no difference in dropouts rate  
11 between ST and MT at the end of the trials(105/612 compared to 109/626; RR 0.98, 95% CI 0.77  
12 to 1.25 ; 1238 participants,  $I^2=0%$ ,  $P=0.90$ ; low quality of evidence downgraded two levels for  
13 high risk of bias) (**Figure 4**).  
14  
15

16  
17 **Figure 4:** Forest plot of comparison ST versus MT in number of dropouts outcome  
18  
19

## 20 **Adverse effects**

21

22  
23 Adverse effects were generally under-reported, six trials were included in the meta-  
24 analysis.(24-26, 34, 35, 43)  
25

26 Two trials reported AE overall occurrence without specified event rates in the groups.(22, 30)  
27 AE were predominantly minor and lasted for two/three days after treatment, in the majority of  
28 trials transient worse pain, tiredness, muscle weakness and transient headache were  
29 reported.(24, 34, 35, 43)  
30

31 Senna M 2011 reported the most common AE were local discomfort and tiredness but no  
32 serious complications were noted. (30)

33 Haller H 2016 reported two patients dropping out from the trial for recurrent headache after  
34 treatments, both Haller H and Klein R 2013 reported dizziness of one patient.

35 Licciardone J 2013 reported 27% of patients with AE, 2% had serious AE not related to study  
36 interventions. (22)  
37  
38

39 Overall results showed no clear difference in AE occurrence between ST and MT (32/267  
40 compared to 38/264; RR 0.84, 95% CI 0.55 to 1.28; 531 participants,  $I^2=26%$ ,  $P=0.42$ ; low quality  
41 of evidence downgraded two levels for inconsistency) (**Figure 5**).Senna and Licciardone were  
42 excluded from analysis because they did not provide separate data for each group.  
43  
44

45 **Figure 5:** Forest plot of comparison ST versus MT in number of adverse events outcome at short-  
46 term  
47  
48  
49  
50  
51  
52  
53  
54  
55  
56  
57  
58  
59  
60

## Sham treatment versus control

### Pain

Five studies compared ST to control, four were included in random-effect meta-analysis at short-term. (23-25, 27) Data from one trial could not be extracted. (29) Pooled data showed the presence of significant heterogeneity, therefore results are reported narratively: three trials showed no difference between ST and control on pain outcome, while Eardley S. 2013 showed an effect in favour of ST (pooled data from 4 trials: MD -6.04, 95%CI from -16.68 to 4.59, 252 participants,  $I^2=80\%$ ,  $P=0.27$ ). The exclusion of Erdogmus S 2013 (that used a different scale) did not affect the results of effectiveness but decreased levels of heterogeneity (MD -9.72, 95%CI -19.94 to 0.51,  $I^2=69\%$ ,  $P=0.12$ ) (**Appendix 5**).

### Dropouts

No differences were showed in the fixed-effect meta-analysis on dropout rate between ST and control in five trials (27/165 compared to 34/166; RR 0.79, 95% CI 0.51 to 1.23 ; 331 participants,  $I^2=0\%$ ,  $P=0.30$ ; very low quality of evidence downgraded two levels for very serious risk of bias and imprecision) (**Figure 6**).

**Figure 6:** Forest plot of comparison ST versus control in number of dropouts outcome

### Adverse effects

Of the five studies comparing ST and control, only two reported AE. One, Eardley S 2013, did not evaluate the AE occurred in control group while Erdogmus C 2007 reported that 10/40 in the control group and 11/40 in ST group turned to other therapies for complains.



## Discussion

Results show a small, not clinically meaningful effect in favour of MT for short-term pain relief compared with sham treatment. However, the quality of evidence is very low, indicating that the true effect is probably markedly different from the estimated effect. Substantial levels of heterogeneity within the four studies analysed, showed no differences between sham treatment and control in pain reduction

Success of blinding was reported in four trials that compared sham treatment to MT, with high percentage of correct detection of treatment allocations by participants.

AE were generally under-reported, with a similar rate of occurrence between sham and MT accompanying low levels of heterogeneity. Only one study reported AE in control group with no significant difference from ST.

The performance bias was the bias that recurred most with a possible or unclear presence of lack of participants blinding in 76% of the studies included in this review.

SM techniques were the treatment most evaluated (N=7). These techniques are highly recognizable by patients for a popping sound emitted by the column during their performance.<sup>(45)</sup>The fact that participants enrolled in these trials were eligible despite having already received SM, threatens the validity of blinding. This thought is strengthened by the high percentage of participants who recognized treatment allocation in this kind of trial (from 63.5% to 83.5%).<sup>(23, 27)</sup> Additionally, five trials applied sham treatment in a different site compared to pain and active treatment. This might have had important influences on sham therapy reliability and consequently to study results.

Reliability of sham therapy seemed not to be related to dropouts rate, although both these data were reported only in two trials. Bialosky J and Hoiriis K showed high percentages of correct treatment allocation detection by participants but dropout rate between sham and MT group did not differ. These results seem to be in conflict, nevertheless, participants could have wanted to remain in the trial for several other reasons such as settings or being evaluated by an expert clinician free. This possibility is reinforced by the fact that a similar dropout rate was reached in the comparison sham versus control. These data suggest that dropout rate might not be a dependable outcome for assessing reliability of sham therapy. The majority of trials judged as at high or unclear risk of performance bias used a single technique evaluating its effects on pain soon after its performance, or its effect after different sessions. Single techniques were generally more difficult to mask, negatively affecting the validity of blinding of participants. Moreover, it should be asked what result can be achieved with the application of a single technique in a single therapeutic session and if the possible changes detected could be clinically meaningful and long-lasting for the enrolled patients.

This review included generally small trials. Only 14 of 24 studies performed a sample size calculation but just two of these considered MCID in this computation. The MCID is the measure of smallest change of PROs that patients perceive as important, beneficial or harmful. MCID is useful for clinicians to interpret the findings of trials and apply them in clinical practice and to their decision-making.<sup>(46)</sup> An adequate sample size calculation, using MCID especially in trials with PROs, is fundamental to assess the number of participants needed to detect clinically relevant treatment effects. Oversized trials, which expose too many people to unnecessary therapies, or underpowered trials, which may not achieve significant results, should be avoided.<sup>(47-49)</sup>

1  
2  
3 Our results are similar to other reviews findings, notwithstanding that these reviews did not  
4 consider the difference between kinds of ST provided (hand contact or machines) and  
5 evaluated the effect of a singular type of MT (such as SM or OMT) compared to sham  
6 treatment.(50, 51)  
7  
8

### 9 **Limitations**

10  
11 This review aimed to compare different kinds of sham therapy with different kinds of MT and  
12 control. The nature of this comparison needed an NMA, but this analysis could not be  
13 performed due to the small number of trials using hand contact ST. The decision to include only  
14 this kind of sham therapy was mainly due to the intention of analysing the effect of manual  
15 interaction between practitioner and patients, which is suspected of leading to an amplified  
16 placebo effect. (52) Additionally, the use of machine placebo trials in the same meta-analysis  
17 could have increased diversity within trials included due to the possible enhanced presence of  
18 biases such as performance and consequently detection ones.  
19  
20  
21  
22

23 Although the population differed - some trials analysed cervical, others lumbar pain with  
24 different aetiologies and different symptoms duration - this factor did not affect the meta-  
25 analysis performed, as highlighted by the low heterogeneity found in the primary outcome.  
26 As already suggested by other authors, (1) placebo effect might be influenced by chronic pain,  
27 nevertheless, in this review, this analysis could not be performed due to the range of pain  
28 duration in trials included (from acute to chronic in the same trial).  
29  
30

31 Data concerning settings and operators were insufficient to evaluate the influence of these two  
32 factors on sham therapy response. Experience of practitioners was considered in data  
33 extraction but insufficient information was provided by authors to draw any hypothesis.

34 Another limit was in not considering non-objective outcomes as primary outcome for meta-  
35 analysis. Nevertheless, most of the trials included did not evaluate an objective outcome and  
36 the few studies which analysed this type of outcome used different kinds of scales not easily  
37 comparable in a meta-analysis.  
38  
39

40 Pair-wise comparison on pain outcome between sham and MT showed slightly higher effects of  
41 MT in trials where blinding was ensured. A linear regression analysis was planned to assess the  
42 impact of blinding on meta-analysis results. Due to the small number of trials, this analysis  
43 could not be performed. This trend follows what has been already suggested by other studies.  
44 (53) However trials with bigger sample size are needed to assess a real correlation between  
45 these two factors.  
46  
47

48 Another limit of this study is that risk of bias was assessed by one author (CL) and agreed by  
49 another (MG). This aspect could have improved if both authors worked independently on bias  
50 risk assessment and then discussed any discrepancy.  
51  
52  
53

### 54 **Implications for practice and research**

55  
56 There is very low quality of evidence that sham compared to MT might be less effective and  
57 equally safe in the treatment of patients affected by back pain. Future studies should address  
58  
59  
60

1  
2  
3 meaningful research question and improve their methodological properties to ensure patients  
4 safety and to guarantee reliability of study results  
5

6  
7 Researchers should pay particular attention to sample size calculation using the MCID. This  
8 difference is fundamental both for research and patients. MCID indicates patients' values and  
9 preferences and can help clinicians improve interpretation and promote the understanding of  
10 the importance of intervention effects in RCTs.

11 Although in MT trials a true placebo is difficult to achieve, trials should also implement  
12 strategies to guarantee patients and assessors blinding, for example avoiding the inclusion of  
13 participants who already received the active treatment. Plans to avoid performance bias, such  
14 as giving similar treatment with similar localization have to be implemented.

15  
16 Moreover, the evaluation of the success of blinding should be considered as, at least, secondary  
17 outcome.

18  
19 Future researches should also evaluate the real effects of ST comparing it both with active  
20 treatment and to control groups. Only with this kind of design the real placebo effect in MT  
21 could be defined.  
22

23  
24 Trials should also focus on including participants with similar characteristics such as duration of  
25 symptoms (acute or chronic pain).

26 The majority of studies included in this review used a single technique treatment (N=11),  
27 however the clinical relevance of demonstrating the effectiveness of a singular technique is not  
28 clear. In a clinical context, most manual treatments usually involve different kinds of techniques  
29 in the same treatment session, so trials that evaluate the effectiveness of a type of treatment  
30 should include a routine of techniques in order to be more similar to clinical approaches.  
31 Studies should also consider using objective end points, not patient-reported or observer-  
32 reported, with a longer period of follow-up. All these design implementations might not have a  
33 great impact on the demonstration of effectiveness of MT in BP, nevertheless, addressing  
34 meaningful researches questions, closer to the therapeutic context, could probably help to  
35 assess the real clinical effects of sham and MT.  
36  
37  
38

## 39 40 Conclusions

41  
42 This review aimed to evaluate ST effect in MT trials. Although MT showed higher efficacy than  
43 ST, these findings were not clinically meaningful and the very low quality of the included studies  
44 might undermine the reliability of this reviews' results.  
45

46  
47 The use of ST and its application in MT study is very controversial. Future trials should focus on  
48 developing a reliable kind of sham procedure similar to the active treatment, to ensure  
49 participants blinding and to guarantee a proper sample size for the detection of reliable,  
50 clinically relevant, treatment effects.  
51  
52  
53  
54  
55  
56  
57  
58  
59  
60

1  
2  
3  
4  
5  
6  
7  
8  
9  
10  
11  
12  
13  
14  
15  
16  
17  
18  
19  
20  
21  
22  
23  
24  
25  
26  
27  
28  
29  
30  
31  
32  
33  
34  
35  
36  
37  
38  
39  
40  
41  
42  
43  
44  
45  
46  
47  
48  
49  
50  
51  
52  
53  
54  
55  
56  
57  
58  
59  
60

**Contributors:**

*CL* conceived the idea of this review and designed the study with the contribution of *MG* who also helped in literature search and in the interpretation of study findings. *CL* and *MG* revised studies, performed data extraction and analysis and wrote this review.

*AA* and *AM* provided clinical and technical support, reviewed the manuscript and helped in publication and with the clinical interpretation of study findings.

*CL* is the guarantor of this paper. The corresponding author attests that all listed authors meet authorship criteria and that no others meeting the criteria have been omitted.

Patients and public were not involved in this project.

**Acknowledgements:** We thank Valentina Rotondi, statistician, for all her support during the statistical analysis and data interpretation. We thank Roberta Maoret, librarian, for helping us in the search strategy implementation.

**Data sharing:** Details of the characteristics of the included studies and data extracted are available from the corresponding author at [carolina.lavazza@docenti.aimoedu.it](mailto:carolina.lavazza@docenti.aimoedu.it).

## References

1. Meissner K, Fässler M, Rücker G, Kleijnen J, Hróbjartsson A, Schneider A, et al. Differential effectiveness of placebo treatments: a systematic review of migraine prophylaxis. . JAMA internal medicine. 2013;173(21):1941-51.
2. Sciences CfIOoM. International Ethical Guidelines for Health-Related Research Involving Humans, Fourth Edition. Geneva2016.
3. REGULATION (EU) No 536/2014 OF THE EUROPEAN PARLIAMENT AND OF THE COUNCIL of 16 April 2014 on clinical trials on medicinal products for human use, and repealing Directive 2001/20/EC, (2014).
4. Korthals-de Bos IB, Müllner M, Hoving JL, van Tulder MW, Rutten-van Mölken MP, Adèr HJ, et al. Cost effectiveness of physiotherapy, manual therapy, and general practitioner care for neck pain: economic evaluation alongside a randomised controlled trial. BMJ. 2003;326(7395):1-6.
5. Kawchuk G N, Haugen R, Fritz J. A True Blind for Subjects Who Receive Spinal Manipulation Therapy. Archives of Physical Medicine and Rehabilitation. 2009;90(2):366-8.
6. Mancini F, Beaumont AL, Hu L, Haggard P, Iannetti GDD. Touch inhibits subcortical and cortical nociceptive responses. Pain. 2015;156(10).
7. So PS, Jiang JY, Qin Y. Touch therapies for pain relief in adults. . Cochrane Database of Systematic Reviews. 2008.
8. Cai L., He L. Placebo effects and the molecular biological components involved. General psychiatry. 2019;32(5):1-10.
9. Kaptchuk T. J., Miller F. G. Placebo effects in medicine. N Engl J Med. 2015;373(1):8-9.
10. Finniss DG, Kaptchuk TJ, Miller F, Benedetti F. Placebo effects: biological, clinical and ethical advances. . Lancet. 2010;375:686.
11. Price DD, Finniss DG, Benedetti F. A comprehensive review of the placebo effect: recent advances and current thought. Annu Rev Psychol. 2008;59:565-90.
12. Miller C. B., Espie C. A., Epstein D. R., et al. The evidence base of sleep restriction therapy for treating insomnia disorder. . Sleep medicine reviews. 2014;18(15):415-24.
13. Colloca L, Miller FG. The nocebo effect and its relevance for clinical practice. Psychosomatic medicine. 2011;73:598-603.
14. Koes BW. How to evaluate manual therapy: value and pitfalls of randomized clinical trials. Manual therapy. 2004:183-4.
15. Chaibi A, Benth JŠ, Russell MB. Validation of placebo in a manual therapy randomized controlled trial. Scientific reports. 2015;5(1):1-8.
16. Moher D, Shamseer L, Clarke M, Ghersi D, Liberati A, Petticrew M et al. Preferred reporting items for systematic review and meta-analysis protocols (PRISMA-P) 2015 statement. Systematic Reviews. 2015;4(1):1.
17. Pool JJ, Ostelo RW, Hoving JL, Bouter LM, De Vet HC. Minimal clinically important change of the Neck Disability Index and the Numerical Rating Scale for patients with neck pain. . Spine. 2007;32(26):3047-51.
18. Ostelo RW, Deyo RA, Stratford P, Waddell G, Croft P, Von Korff M, et al. Interpreting change scores for pain and functional status in low back pain: towards international consensus regarding minimal important change. . Spine. 2008;33(1):90-4.
19. Farrar JT, Young Jr JP, LaMoreaux L, Werth JL, Poole RM. Clinical importance of changes in chronic pain intensity measured on an 11-point numerical pain rating scale. . Pain. 2001;94(2):149-58.

1  
2  
3  
4  
5  
6  
7  
8  
9  
10  
11  
12  
13  
14  
15  
16  
17  
18  
19  
20  
21  
22  
23  
24  
25  
26  
27  
28  
29  
30  
31  
32  
33  
34  
35  
36  
37  
38  
39  
40  
41  
42  
43  
44  
45  
46  
47  
48  
49  
50  
51  
52  
53  
54  
55  
56  
57  
58  
59  
60

20. Higgins JPT, Green S. Cochrane Handbook for Systematic Reviews of Interventions Version 5.1.0 [updated March 2011].9.5.2 Identifying and measuring heterogeneity. [https://handbook-5-1.cochrane.org/chapter\\_9/9\\_5\\_2\\_identifying\\_and\\_measuring\\_heterogeneity.htm](https://handbook-5-1.cochrane.org/chapter_9/9_5_2_identifying_and_measuring_heterogeneity.htm): The Cochrane Collaboration; 2011.
21. Higgins JPT, Green S. Cochrane Handbook for Systematic Reviews of Interventions Version 5.1.0 [updated March 2011]. . [https://handbook-5-1.cochrane.org/index.htm#chapter\\_8/8\\_assessing\\_risk\\_of\\_bias\\_in\\_included\\_studies.htm](https://handbook-5-1.cochrane.org/index.htm#chapter_8/8_assessing_risk_of_bias_in_included_studies.htm): The Cochrane Collaboration; 2011.
22. Licciardone JC, Minotti DE, Gatchel RJ, Kearns CM, Singh K. Osteopathic manual treatment and ultrasound therapy for chronic low back pain: a randomized controlled trial. *The Annals of Family Medicine*. 2013;11(2):122-9.
23. Bialosky JE, George SZ, Horn ME, Price DD, Staud R, Robinson ME. Spinal manipulative therapy-specific changes in pain sensitivity in individuals with low back pain (NCT01168999). . *The journal of pain*. 2014;15(2):136-48.
24. Eardley S, Brien S, Little P, Prescott P, Lewith G. Professional kinesiology practice for chronic low back pain: single-blind, randomised controlled pilot study. . *Complementary Medicine Research*. 2013;20(3):180-8.
25. Erdogmus CB, Resch KL, Sabitzer R, Müller H, Nuhr M, Schöggel A, et al. Physiotherapy-based rehabilitation following disc herniation operation: results of a randomized clinical trial. . *Spine*. 2007;32(19):2041-9.
26. Hansen FR, Bendix T, Skov P, Jensen CV, Kristensen JH, Krohn L, et al. Intensive, dynamic back-muscle exercises, conventional physiotherapy, or placebo-control treatment of low-back pain. A randomized, observer-blind trial. *Spine*. 1993;18(1):98-108.
27. Hoiriis KT, Pflieger B, McDuffie FC, Cotsonis G, Elsangak O, Hinson R, et al. A randomized clinical trial comparing chiropractic adjustments to muscle relaxants for subacute low back pain. *Journal of Manipulative and Physiological Therapeutics*. 2004;27(6):388-98.
28. Krekoukias G, Gelalis ID, Xenakis T, Gioftsos G, Dimitriadis Z, Sakellari V. Spinal mobilization vs conventional physiotherapy in the management of chronic low back pain due to spinal disk degeneration: a randomized controlled trial. . *Journal of Manual & Manipulative Therapy*. 2017;25(2):66-73.
29. Licciardone JC, Stoll ST, Fulda KG, Russo DP, Siu J, Winn W, et al. Osteopathic manipulative treatment for chronic low back pain: A randomized controlled trial. *Spine*. 2003;28(13):1355-62.
30. Senna MK, Machaly SA. Does maintained spinal manipulation therapy for chronic nonspecific low back pain result in better long-term outcome? *Spine*. 2011;36(18).
31. Lascurain-Aguirrebeña I, Newham DJ, Casado-Zumeta X, Lertxundi A, Critchley DJ. Immediate effects of cervical mobilisations on global perceived effect, movement associated pain and neck kinematics in patients with non-specific neck pain. A double blind placebo randomised controlled trial. *Musculoskeletal Science and Practice*. 2018;38:83-90.
32. Selkow NM, Grindstaff TL, Cross KM, Pugh K, Hertel J, Saliba S. Short-term effect of muscle energy technique on pain in individuals with non-specific lumbopelvic pain: a pilot study. . *Journal of manual & manipulative therapy*. 2009;19(1):14E-8E.
33. Antolinos-Campillo PJ, Oliva-Pascual-Vaca A, Rodríguez-Blanco C, Heredia-Rizo AM, Espí-López GV, Ricard F. Short-term changes in median nerve neural tension after a suboccipital muscle inhibition technique in subjects with cervical whiplash: a randomised controlled trial. *Physiotherapy*. 2014;100(3):249-55.



- 1  
2  
3 34. Haller H, Lauche R, Cramer H, Rampp T, Saha FJ, Ostermann T, et al. Craniosacral therapy  
4 for the treatment of chronic neck pain: a randomized sham-controlled trial. *The Clinical journal*  
5 *of pain*. 2016;32(5):441- 9.  
6  
7 35. Klein R, Bareis A, Schneider A, Linde K. Strain-counterstrain to treat restrictions of the  
8 mobility of the cervical spine in patients with neck pain—A sham-controlled randomized trial.  
9 *Complementary Therapies in Medicine*. 2013;21(1):1–7.  
10  
11 36. Younes M, Nowakowski K, Didier-Laurent B, Gombert M, Cottin F. Effect of spinal  
12 manipulative treatment on cardiovascular autonomic control in patients with acute low back  
13 pain. *Chiropractic and Manual Therapies*. 2017;25(1).  
14  
15 37. Quinn F, Hughes CM, Baxter GD. Reflexology in the management of low back pain: A  
16 pilot randomised controlled trial. *Complementary Therapies in Medicine*. 2008;16(1):3-8.  
17  
18 38. Sillevs R, Cleland J, Hellman M, Beekhuizen K. Immediate effects of a thoracic spine  
19 thrust manipulation on the autonomic nervous system: a randomized clinical trial. . *Journal of*  
20 *Manual & Manipulative Therapy* . 2010;18.  
21  
22 39. Cleland JA, Childs MJD, McRae M, Palmer JA, Stowell T. Immediate effects of thoracic  
23 manipulation in patients with neck pain: a randomized clinical trial. . *Manual therapy*.  
24 2005;10(2):127-35.  
25  
26 40. Pires PF, Packer AC, Dibai-Filho AV, Rodrigues-Bigaton D. Immediate and short-term  
27 effects of upper thoracic manipulation on myoelectric activity of sternocleidomastoid muscles  
28 in young women with chronic neck pain: A randomized blind clinical trial. . *Journal of*  
29 *manipulative and physiological therapeutics*. 2015;38(8).  
30  
31 41. Silva AC, Biasotto-Gonzalez DA, Oliveira FHM, Andrade AO, Gomes CADFP, Lanza FDC, et  
32 al. Effect of osteopathic visceral manipulation on pain, cervical range of motion, and upper  
33 trapezius muscle activity in patients with chronic nonspecific neck pain and functional  
34 dyspepsia: a randomized, double-blind, placebo-controlled pilot study. . *Evidence-Based*  
35 *Complementary and Alternative Medicine*. 2018;2018:1-9.  
36  
37 42. Vieira-Pellenz F, Oliva-Pascual-Vaca Á, Rodriguez-Blanco C, Heredia-Rizo AM, Ricard F,  
38 Almazán-Campos G. Short-term effect of spinal manipulation on pain perception, spinal  
39 mobility, and full height recovery in male subjects with degenerative disk disease: a randomized  
40 controlled trial. . *Archives of physical medicine and rehabilitation*. 2014;95(9):1613-9.  
41  
42 43. Kogure A, Kotani K, Katada S, Takagi H, Kamikozuru M, Isaji T, et al. A randomized,  
43 single-blind, placebo-controlled study on the efficacy of the arthrokinematic approach-hakata  
44 method in patients with chronic nonspecific low back pain. *PloS one*. 2015;10(12):1-16.  
45  
46 44. Hall T, Hardt S, Schafer A, Wallin L. Mulligan bent leg raise technique—a preliminary  
47 randomized trial of immediate effects after a single intervention. *Manual Therapy*.  
48 2006;11(2):130-5.  
49  
50 45. Dunning J, Mourad F, Barbero M, Leoni D, Cescon C, Butts R. Bilateral and multiple  
51 cavitation sounds during upper cervical thrust manipulation. . *BMC musculoskeletal disorders*.  
52 2013;14(1):24.  
53  
54 46. BC J, S E, A C-L, Furukawa TA, Patrick DL, Crawford MW et al. Minimally important  
55 difference estimates and methods: a protocol. *BMJ Open*. 2015;5:1-5.  
56  
57 47. Charles P, Giraudeau B, Dechartres A, Baron G, Ravaud P. Reporting of sample size  
58 calculation in randomised controlled trials. *BMJ*. 2009;388.  
59  
60 48. Moher D, Hopewell S, Schulz KF, Montori V, Gøtzsche PC, Devereaux PJ et al. CONSORT  
2010 explanation and elaboration: updated guidelines for reporting parallel group randomised  
trials. . *International journal of surgery*. 2012;10(1):28-55.  
49  
50 49. Turner RM, Bird SM, Higgins JP. The impact of study size on meta-analyses: examination  
of underpowered studies in Cochrane reviews. *PloS one*. 2013;8(3).

1  
2  
3  
4  
5  
6  
7  
8  
9  
10  
11  
12  
13  
14  
15  
16  
17  
18  
19  
20  
21  
22  
23  
24  
25  
26  
27  
28  
29  
30  
31  
32  
33  
34  
35  
36  
37  
38  
39  
40  
41  
42  
43  
44  
45  
46  
47  
48  
49  
50  
51  
52  
53  
54  
55  
56  
57  
58  
59  
60

50. Ruddock JK, Sallis H, Ness A, Perry RE. Spinal manipulation vs sham manipulation for nonspecific low back pain: a systematic review and meta-analysis. . Journal of chiropractic medicine. 2016;15(3):165-83.
51. Rubinstein SM, De Zoete A, Van Middelkoop M, Assendelft WJ, De Boer MR, Van Tulder MW. Benefits and harms of spinal manipulative therapy for the treatment of chronic low back pain: systematic review and meta-analysis of randomised controlled trials. BMJ. 2019;364.
52. Monroe CM. The effects of therapeutic touch on pain. Journal of Holistic Nursing. 2009;27(2):85-92.
53. Rubinstein SM, van Eekelen R, Oosterhuis T, de Boer MR, Ostelo RW, van Tulder MW. The risk of bias and sample size of trials of spinal manipulative therapy for low back and neck pain: analysis and recommendations. Journal of manipulative and physiological therapeutics. 2014;37(8):523-41.

For peer review only



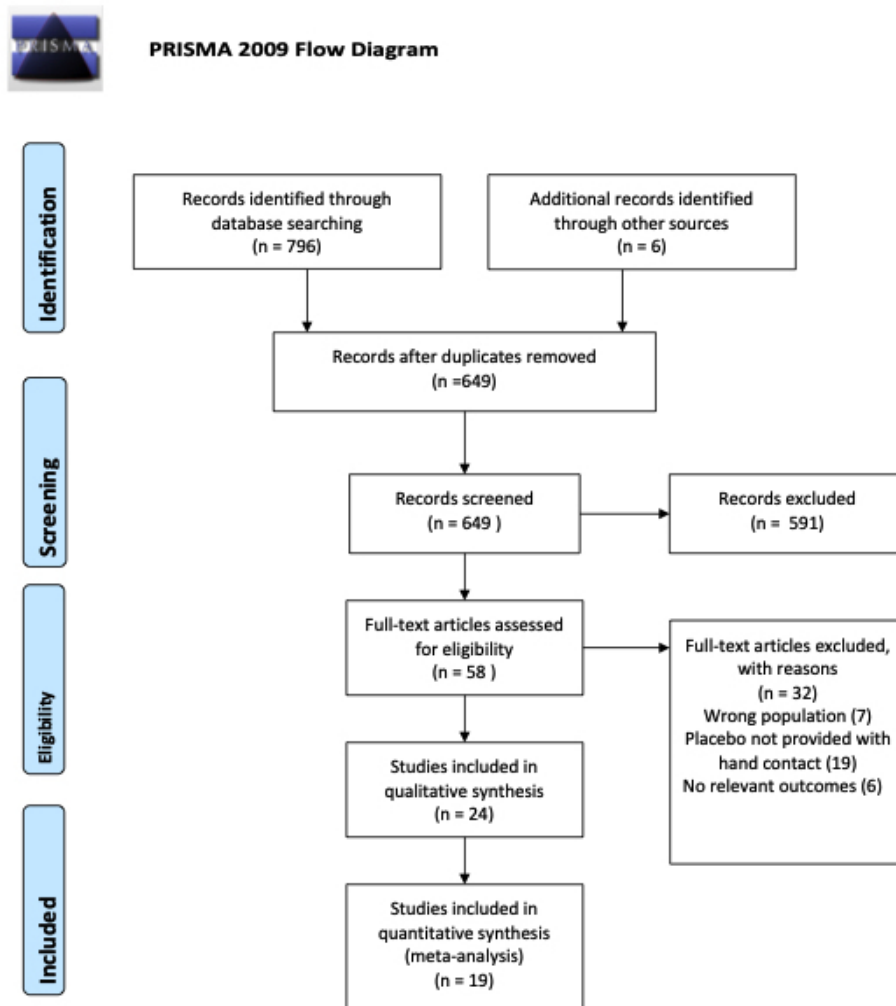

Figure 1: PRISMA flow diagram

48x56mm (298 x 300 DPI)

1  
2  
3  
4  
5  
6  
7  
8  
9  
10  
11  
12  
13  
14  
15  
16  
17  
18  
19  
20  
21  
22  
23  
24  
25  
26  
27  
28  
29  
30  
31  
32  
33  
34  
35  
36  
37  
38  
39  
40  
41  
42  
43  
44  
45  
46  
47  
48  
49  
50  
51  
52  
53  
54  
55  
56  
57  
58  
59  
60

|                             | Random sequence generation (selection bias) | Allocation concealment (selection bias) | Blinding of participants and personnel (performance bias) | Blinding of outcome assessment (detection bias) | Incomplete outcome data (attrition bias) | Selective reporting (reporting bias) | Other bias |
|-----------------------------|---------------------------------------------|-----------------------------------------|-----------------------------------------------------------|-------------------------------------------------|------------------------------------------|--------------------------------------|------------|
| Antolinos-Campillo PJ 2014  | ●                                           | ?                                       | ●                                                         | ●                                               | ●                                        | ?                                    | ●          |
| Bialosky J 2014             | ●                                           | ●                                       | ●                                                         | ●                                               | ●                                        | ●                                    | ●          |
| Cleland JA 2005             | ●                                           | ?                                       | ?                                                         | ?                                               | ●                                        | ?                                    | ?          |
| Eardley S 2013              | ?                                           | ?                                       | ●                                                         | ?                                               | ●                                        | ●                                    | ●          |
| Erdogmus C 2007             | ?                                           | ●                                       | ●                                                         | ●                                               | ●                                        | ●                                    | ?          |
| Haller H 2016               | ●                                           | ●                                       | ●                                                         | ●                                               | ●                                        | ●                                    | ●          |
| Hall T 2004                 | ●                                           | ●                                       | ●                                                         | ●                                               | ●                                        | ?                                    | ●          |
| Hansen F 1993               | ●                                           | ?                                       | ?                                                         | ●                                               | ●                                        | ?                                    | ●          |
| Hidalgo B 2015              | ?                                           | ●                                       | ●                                                         | ●                                               | ●                                        | ●                                    | ?          |
| Hoiris K 2004               | ●                                           | ?                                       | ?                                                         | ●                                               | ●                                        | ?                                    | ●          |
| Klein R 2013                | ●                                           | ●                                       | ●                                                         | ●                                               | ●                                        | ?                                    | ●          |
| Kogure A 2015               | ●                                           | ●                                       | ●                                                         | ●                                               | ●                                        | ?                                    | ●          |
| Krekoukias G 2017           | ●                                           | ?                                       | ?                                                         | ?                                               | ●                                        | ●                                    | ●          |
| Lascuraiñ-Agulrebeña I 2018 | ?                                           | ●                                       | ?                                                         | ●                                               | ●                                        | ●                                    | ●          |
| Licciardone J. 2013         | ●                                           | ●                                       | ●                                                         | ?                                               | ●                                        | ●                                    | ●          |
| Licciardone J 2003          | ●                                           | ?                                       | ●                                                         | ?                                               | ●                                        | ●                                    | ●          |
| Pires FP 2015               | ?                                           | ?                                       | ●                                                         | ?                                               | ●                                        | ●                                    | ●          |
| Quinn F 2008                | ●                                           | ●                                       | ●                                                         | ●                                               | ?                                        | ?                                    | ?          |
| Selkow NM 2009              | ●                                           | ●                                       | ?                                                         | ?                                               | ●                                        | ?                                    | ●          |
| Senna MK 2011               | ●                                           | ●                                       | ?                                                         | ?                                               | ●                                        | ●                                    | ●          |
| Sillevis R 2010             | ●                                           | ●                                       | ?                                                         | ?                                               | ●                                        | ?                                    | ?          |
| Silva A 2018                | ●                                           | ●                                       | ●                                                         | ?                                               | ?                                        | ?                                    | ●          |
| Vieira-Pellez F 2014        | ●                                           | ●                                       | ●                                                         | ?                                               | ●                                        | ?                                    | ?          |
| Younes M 2017               | ?                                           | ?                                       | ?                                                         | ?                                               | ●                                        | ?                                    | ?          |

Figure 2: Risk of bias summary. Review authors' judgements about each risk of bias item for each included study.

34x93mm (298 x 299 DPI)

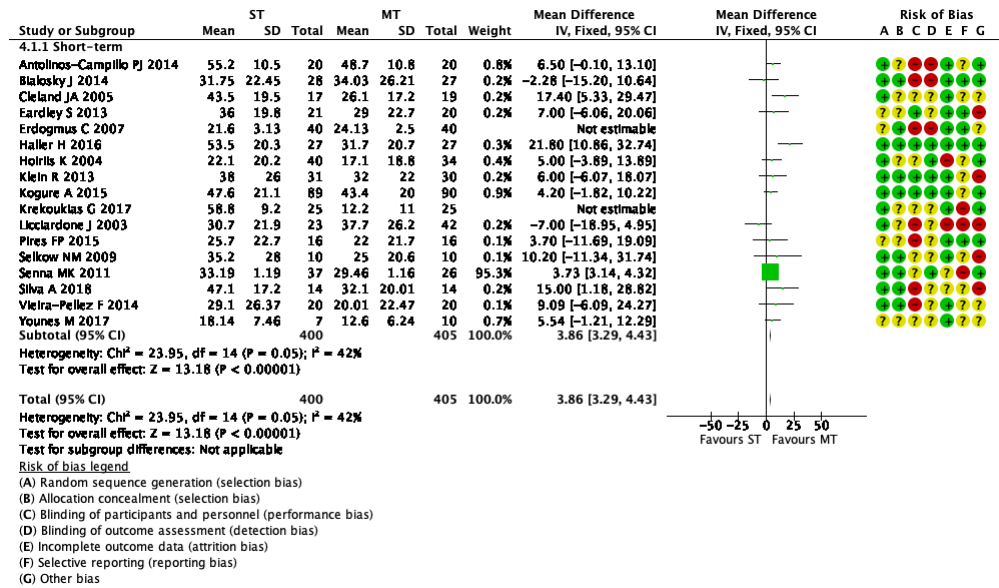

Figure 3: Forest plot of comparison ST versus MT in back pain outcome at short-term.

84x50mm (300 x 298 DPI)

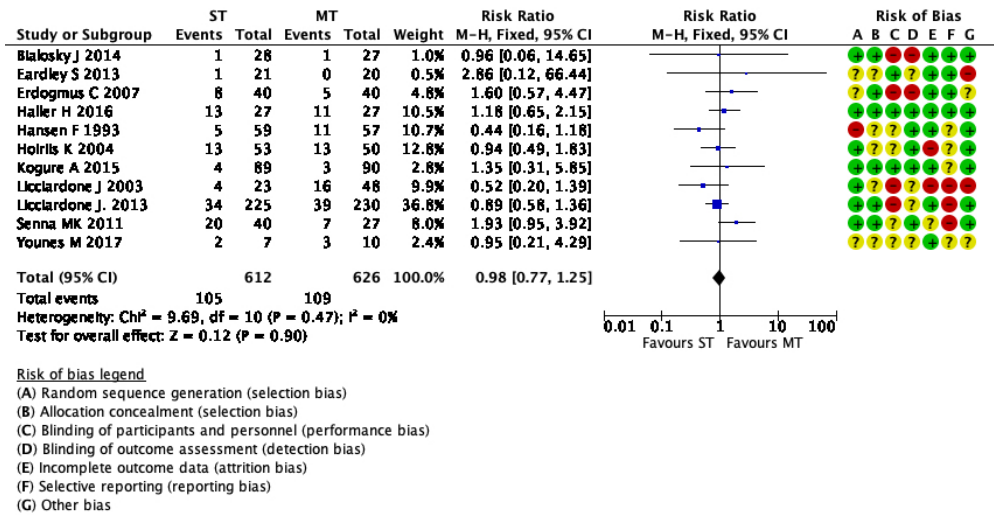

Figure 4: Forest plot of comparison ST versus MT in number of dropouts outcome

72x38mm (299 x 299 DPI)

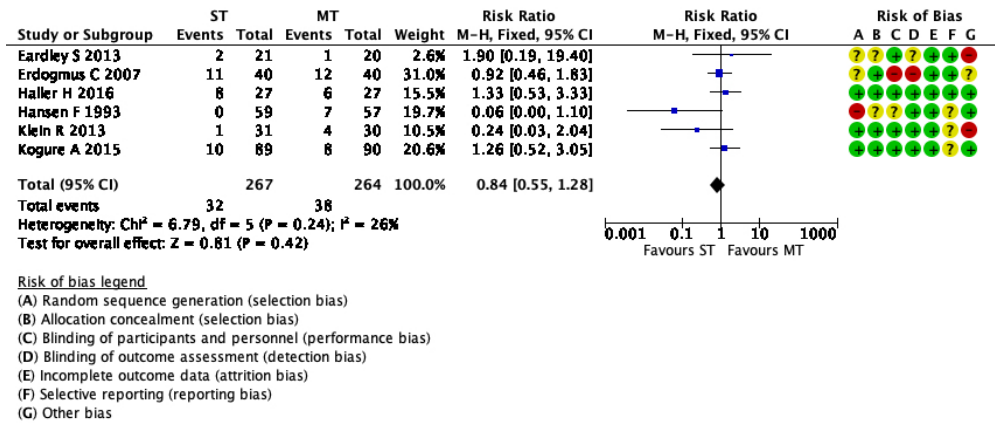

Figure 5: Forest plot of comparison ST versus MT in number of adverse events outcome at short-term

72x31mm (299 x 298 DPI)

1  
2  
3  
4  
5  
6  
7  
8  
9  
10  
11  
12  
13  
14  
15  
16  
17  
18  
19  
20  
21  
22  
23  
24  
25  
26  
27  
28  
29  
30  
31  
32  
33  
34  
35  
36  
37  
38  
39  
40  
41  
42  
43  
44  
45  
46  
47  
48  
49  
50  
51  
52  
53  
54  
55  
56  
57  
58  
59  
60

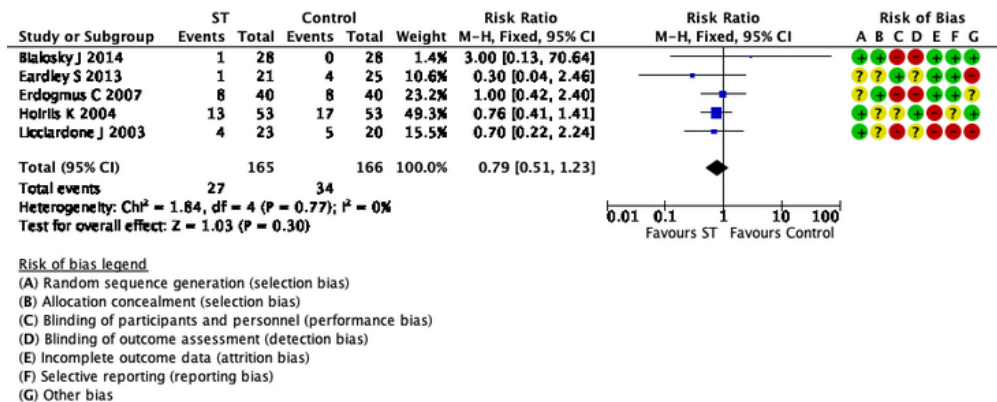

Figure 6: Forest plot of comparison ST versus control in number of dropouts outcome

61x25mm (300 x 300 DPI)

## Appendix 1: search strategy

### Medline

1. Mesh descriptor: [Back Pain] explode all trees
2. dorsalgia/
3. backache
- 4.(neck OR cervical) adj1 pain → Mesh
5. exp Brachial Plexus Neuropathies
6. exp Lumbar Plexus Neuropathies
7. Neck Pain/
8. neckache
9. Torticollis/
10. whiplash.mp
11. cervicodynia.mp
12. spondylitis/ OR spondylosis/ OR spondylolysis/ OR spondylolysthesis
- 13.(lumbar OR dorsal OR neck OR cervical OR sciatica) adj2 (pain OR ache)
14. (lumbar OR dorsal OR neck OR cervical) adj2 (discitis OR disc adj 1 herniation OR disc adj1 herniation)
15. 1 OR 2 OR 3 OR 4 OR 5 OR 6 OR 7 OR 8 OR 9 OR 10 OR 11 OR 12 OR 13 OR 14
16. (PLACEBO\* or MOCK\* or SHAM\* or FAKE\* or VEHICLE\* or DUMM\* or ATTENTION\* CONTROL\* or PSEUDO\* TREAT\* or UN?SPECIFIC\* or NON?SPECIFIC\* OR simulat\$ treatment OR inert agent)
17. Chiropractic/
18. Manipulation, Chiropractic/
19. chiropract\$.tw.
20. (manual adj2 therap\$).mp
21. spinal manipulation.mp. or Manipulation, Spinal/
22. osteopath\$.tw.
23. Osteopathic Medicine/
24. Physical Therapy Modalities/ or "Physical Therapy (Specialty)"/ or physical therap\$.tw. or physiotherap\$.tw.
25. myotherapy.mp
26. shiatsu.mp
- 27.exp Therapeutic Touch/
28. exp Massage/
29. (neuromuscular adj therapy).mp
30. 17 OR 18 OR 19 OR 20 OR OR 21 OR 22 OR 23 OR 24 OR 25 OR 26 OR 27 OR 28 OR 29
31. pain
32. range of motion
33. ROM
34. 31 OR 32 OR 33
35. Clinical Trial/
36. Randomized Controlled Trial/
37. controlled clinical trial/
38. exp RANDOMIZATION/
39. PLACEBO/
40. (random\$ adj2 allocat\$).tw.
41. single blind\$.tw.

1  
2  
3  
4  
5  
6  
7  
8  
9  
10  
11  
12  
13  
14  
15  
16  
17  
18  
19  
20  
21  
22  
23  
24  
25  
26  
27  
28  
29  
30  
31  
32  
33  
34  
35  
36  
37  
38  
39  
40  
41  
42  
43  
44  
45  
46  
47  
48  
49  
50  
51  
52  
53  
54  
55  
56  
57  
58  
59  
60

- 42. double blind\$.tw.
- 43. placebo\$.tw.
- 44. 35 OR 36 OR 37 OR 38 OR 39 OR 40 OR 41 OR 42 OR 43
- 45. animals/
- 46. humans/
- 47. 46 NOT 45
- 48. 15 AND 16 AND 30 AND 44 AND 47

For peer review only



**Appendix 2:** data extraction form

|                      |                                                                                                                                                                                                                                                                                                                                                                                                                                                                                                                                                                           |
|----------------------|---------------------------------------------------------------------------------------------------------------------------------------------------------------------------------------------------------------------------------------------------------------------------------------------------------------------------------------------------------------------------------------------------------------------------------------------------------------------------------------------------------------------------------------------------------------------------|
| <b>Methods</b>       | <b>Trial Design</b><br><br><b>Settings</b>                                                                                                                                                                                                                                                                                                                                                                                                                                                                                                                                |
| <b>Participants</b>  | <b>Total number of participants:</b><br><br><b>Age:</b><br><br><b>Gender(M/F):</b><br><br><b>BMI:</b><br><br><b>Activity:</b><br><br><b>Duration of the symptoms:</b><br><br><b>Location of pain</b> (one-sided, double-sided, central, cervical, dorsal or lumbar):<br><br><b>Cause of pain:</b> (e.g. disc herniation, contractures, aspecific pain)<br><br><b>Previous experience of the treatment provided:</b> Y/N/ N/A<br><br><b>Inclusion and exclusion Criteria:</b><br><br><b>VAS:</b><br><br><b>Practitioner characteristics:</b> (years of experience, gender) |
| <b>Interventions</b> | <b>Placebo:</b><br><br><b>Comparator:</b>                                                                                                                                                                                                                                                                                                                                                                                                                                                                                                                                 |
| <b>Outcomes</b>      | <b>Outcomes used in the meta-analysis:</b><br><br><b>Length of follow-up:</b>                                                                                                                                                                                                                                                                                                                                                                                                                                                                                             |
| <b>Notes</b>         | <b>Difference between Placebo and active treatment:</b><br><br><b>Placebo check for reliability:</b><br><br><b>Adverse event:</b>                                                                                                                                                                                                                                                                                                                                                                                                                                         |

1  
2  
3  
4  
5  
6  
7  
8  
9  
10  
11  
12  
13  
14  
15  
16  
17  
18  
19  
20  
21  
22  
23  
24  
25  
26  
27  
28  
29  
30  
31  
32  
33  
34  
35  
36  
37  
38  
39  
40  
41  
42  
43  
44  
45  
46  
47  
48  
49  
50  
51  
52  
53  
54  
55  
56  
57  
58  
59  
60

|  |                                                         |
|--|---------------------------------------------------------|
|  | <b>Lost to follow-up:</b><br><br><b>Funding source:</b> |
|--|---------------------------------------------------------|

For peer review only

**Appendix 3:** funnel plot of pain outcome with the inclusion (A) and with the exclusion (B) of two studies of Erdogmus C and Krekoukias G.

**(A)**

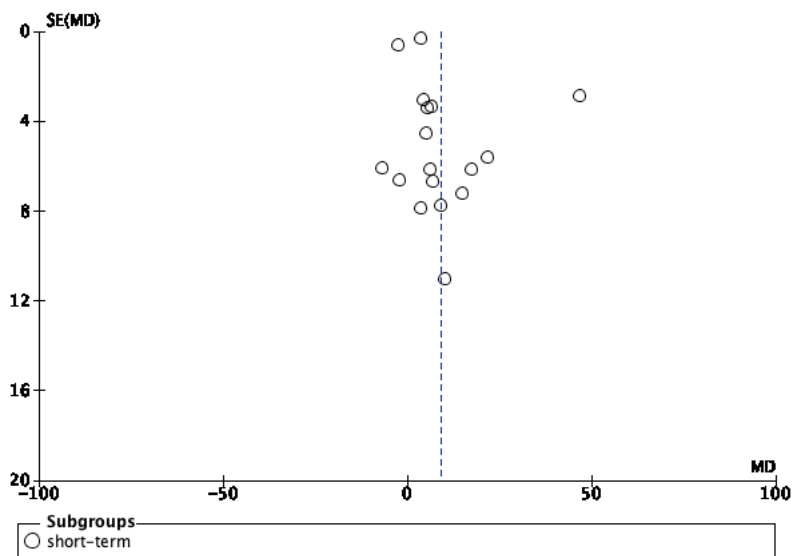

**(B)**

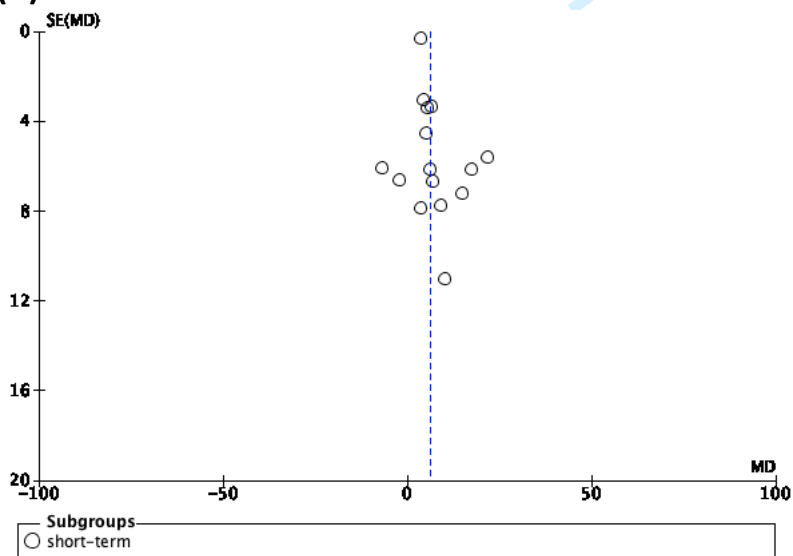

**Appendix 4:** forest plot of comparison pain outcome sham treatment vs manual therapies with the inclusion of two trials (Erdogmus C and Krekoukias G) at short, medium and long-term.

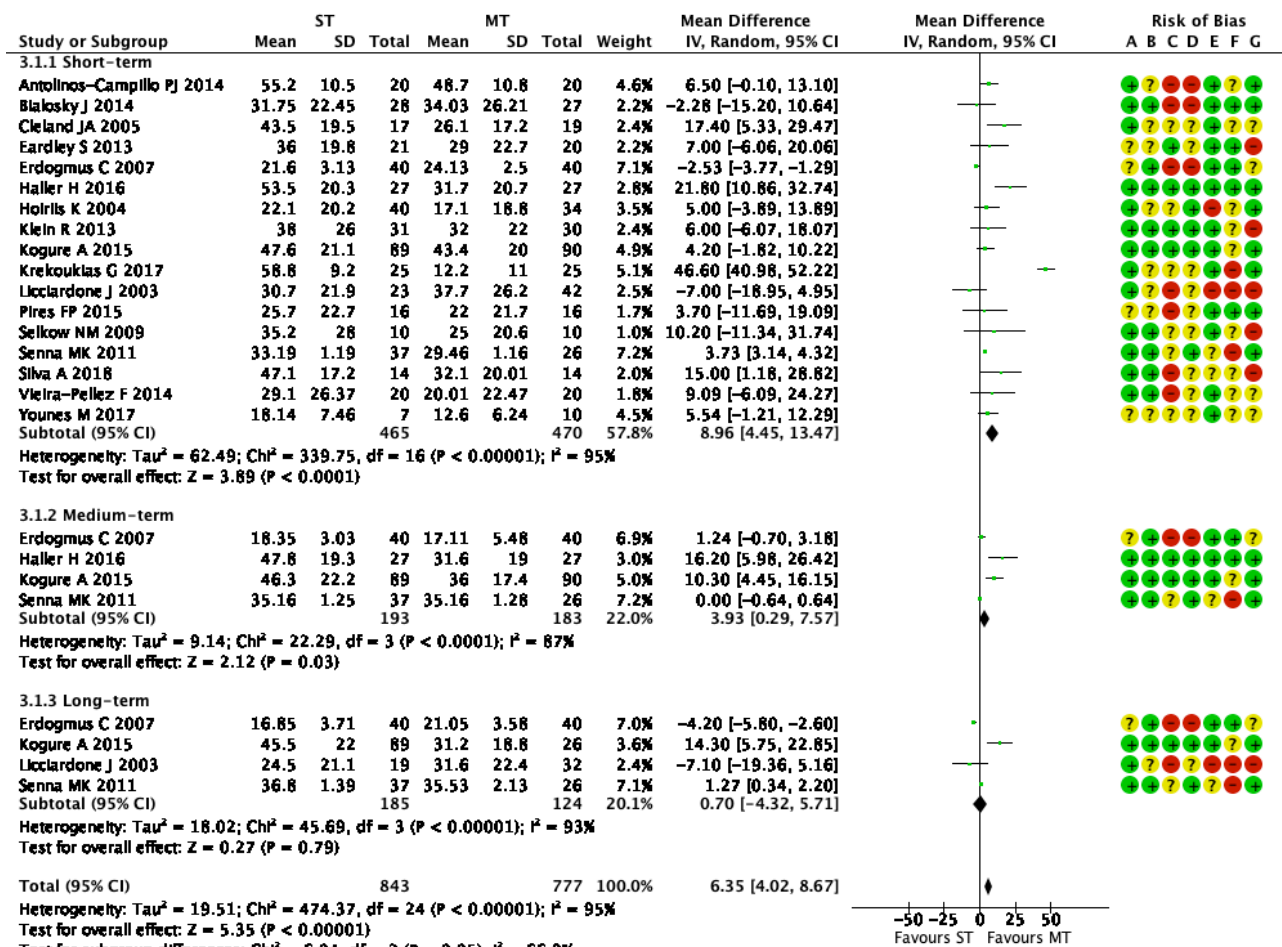

**Risk of bias legend**

(A) Random sequence generation (selection bias)  
 (B) Allocation concealment (selection bias)  
 (C) Blinding of participants and personnel (performance bias)  
 (D) Blinding of outcome assessment (detection bias)  
 (E) Incomplete outcome data (attrition bias)  
 (F) Selective reporting (reporting bias)  
 (G) Other bias

## Appendix 4.1: Sensitivity analysis with the exclusion of Ergogmus C and Krekoukias G at short, medium and long-term

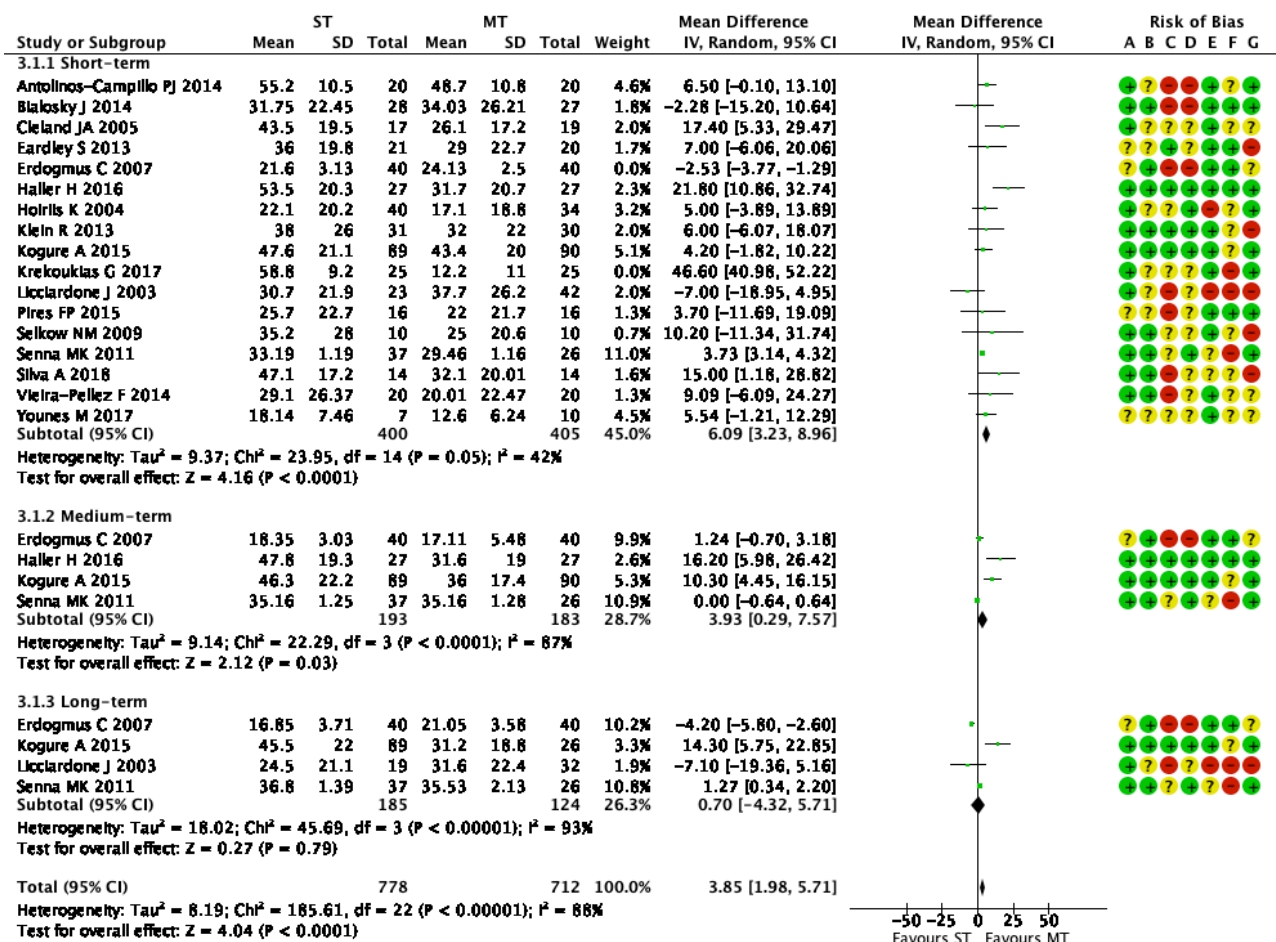

- Risk of bias legend**
- (A) Random sequence generation (selection bias)
  - (B) Allocation concealment (selection bias)
  - (C) Blinding of participants and personnel (performance bias)
  - (D) Blinding of outcome assessment (detection bias)
  - (E) Incomplete outcome data (attrition bias)
  - (F) Selective reporting (reporting bias)
  - (G) Other bias

**Appendix 5:** forest plot of comparison ST versus control in back pain outcome at short-term with exclusion of Erdogmus C 2007 trial

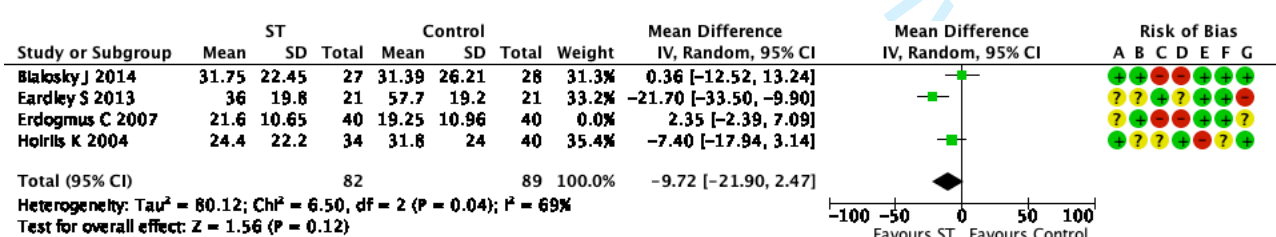

- Risk of bias legend**
- (A) Random sequence generation (selection bias)
  - (B) Allocation concealment (selection bias)
  - (C) Blinding of participants and personnel (performance bias)
  - (D) Blinding of outcome assessment (detection bias)
  - (E) Incomplete outcome data (attrition bias)
  - (F) Selective reporting (reporting bias)
  - (G) Other bias



# PRISMA 2009 Checklist

| Section/topic                      | #  | Checklist item                                                                                                                                                                                                                                                                                              | Reported on page # |
|------------------------------------|----|-------------------------------------------------------------------------------------------------------------------------------------------------------------------------------------------------------------------------------------------------------------------------------------------------------------|--------------------|
| <b>TITLE</b>                       |    |                                                                                                                                                                                                                                                                                                             |                    |
| Title                              | 1  | Identify the report as a systematic review, meta-analysis, or both.                                                                                                                                                                                                                                         | Page 1             |
| <b>ABSTRACT</b>                    |    |                                                                                                                                                                                                                                                                                                             |                    |
| Structured summary                 | 2  | Provide a structured summary including, as applicable: background; objectives; data sources; study eligibility criteria, participants, and interventions; study appraisal and synthesis methods; results; limitations; conclusions and implications of key findings; systematic review registration number. | Page 5             |
| <b>INTRODUCTION</b>                |    |                                                                                                                                                                                                                                                                                                             |                    |
| Rationale                          | 3  | Describe the rationale for the review in the context of what is already known.                                                                                                                                                                                                                              | Pages 9-10         |
| Objectives                         | 4  | Provide an explicit statement of questions being addressed with reference to participants, interventions, comparisons, outcomes, and study design (PICOS).                                                                                                                                                  | Page 10            |
| <b>METHODS</b>                     |    |                                                                                                                                                                                                                                                                                                             |                    |
| Protocol and registration          | 5  | Indicate if a review protocol exists, if and where it can be accessed (e.g., Web address), and, if available, provide registration information including registration number.                                                                                                                               | Pages 6 and 10     |
| Eligibility criteria               | 6  | Specify study characteristics (e.g., PICOS, length of follow-up) and report characteristics (e.g., years considered, language, publication status) used as criteria for eligibility, giving rationale.                                                                                                      | Pages 10-11        |
| Information sources                | 7  | Describe all information sources (e.g., databases with dates of coverage, contact with study authors to identify additional studies) in the search and date last searched.                                                                                                                                  | Page 11            |
| Search                             | 8  | Present full electronic search strategy for at least one database, including any limits used, such that it could be repeated.                                                                                                                                                                               | Appendix 1         |
| Study selection                    | 9  | State the process for selecting studies (i.e., screening, eligibility, included in systematic review, and, if applicable, included in the meta-analysis).                                                                                                                                                   | Page 12            |
| Data collection process            | 10 | Describe method of data extraction from reports (e.g., piloted forms, independently, in duplicate) and any processes for obtaining and confirming data from investigators.                                                                                                                                  | Page 12            |
| Data items                         | 11 | List and define all variables for which data were sought (e.g., PICOS, funding sources) and any assumptions and simplifications made.                                                                                                                                                                       | Page 12-13         |
| Risk of bias in individual studies | 12 | Describe methods used for assessing risk of bias of individual studies (including specification of whether this was done at the study or outcome level), and how this information is to be used in any data synthesis.                                                                                      | Page 12            |
| Summary measures                   | 13 | State the principal summary measures (e.g., risk ratio, difference in means).<br>For peer review only - <a href="http://bmjopen.bmj.com/site/about/guidelines.xhtml">http://bmjopen.bmj.com/site/about/guidelines.xhtml</a>                                                                                 | Pages 12-13        |

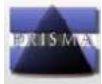

# PRISMA 2009 Checklist

1  
2  
3  
4  
5  
6  
7  
8  
9  
10  
11  
12  
13  
14  
15  
16  
17  
18  
19  
20  
21  
22  
23  
24  
25  
26  
27  
28  
29  
30  
31  
32  
33  
34  
35  
36  
37  
38  
39  
40  
41  
42  
43  
44  
45  
46  
47

|                      |    |                                                                                                                                                           |         |
|----------------------|----|-----------------------------------------------------------------------------------------------------------------------------------------------------------|---------|
| Synthesis of results | 14 | Describe the methods of handling data and combining results of studies, if done, including measures of consistency (e.g., $I^2$ ) for each meta-analysis. | Page 13 |
|----------------------|----|-----------------------------------------------------------------------------------------------------------------------------------------------------------|---------|

Page 1 of 2

| Section/topic                                                                                                                              | #  | Checklist item                                                                                                                                                                                           | Reported on page #         |
|--------------------------------------------------------------------------------------------------------------------------------------------|----|----------------------------------------------------------------------------------------------------------------------------------------------------------------------------------------------------------|----------------------------|
| Risk of bias across studies                                                                                                                | 15 | Specify any assessment of risk of bias that may affect the cumulative evidence (e.g., publication bias, selective reporting within studies).                                                             | Pages 12-13                |
| Additional analyses                                                                                                                        | 16 | Describe methods of additional analyses (e.g., sensitivity or subgroup analyses, meta-regression), if done, indicating which were pre-specified.                                                         | Page 13                    |
| <b>RESULTS</b>                                                                                                                             |    |                                                                                                                                                                                                          |                            |
| Study selection                                                                                                                            | 17 | Give numbers of studies screened, assessed for eligibility, and included in the review, with reasons for exclusions at each stage, ideally with a flow diagram.                                          | Page 15                    |
| Study characteristics                                                                                                                      | 18 | For each study, present characteristics for which data were extracted (e.g., study size, PICOS, follow-up period) and provide the citations.                                                             | Pages 16-19                |
| Risk of bias within studies                                                                                                                | 19 | Present data on risk of bias of each study and, if available, any outcome level assessment (see item 12).                                                                                                | Page 20, figure 2          |
| Results of individual studies                                                                                                              | 20 | For all outcomes considered (benefits or harms), present, for each study: (a) simple summary data for each intervention group (b) effect estimates and confidence intervals, ideally with a forest plot. | Pages 21-23                |
| Synthesis of results                                                                                                                       | 21 | Present results of each meta-analysis done, including confidence intervals and measures of consistency.                                                                                                  | Pages 7-8                  |
| Risk of bias across studies                                                                                                                | 22 | Present results of any assessment of risk of bias across studies (see Item 15).                                                                                                                          | Pages 20-figures 2,3,4,5,6 |
| Additional analysis                                                                                                                        | 23 | Give results of additional analyses, if done (e.g., sensitivity or subgroup analyses, meta-regression [see Item 16]).                                                                                    | Appendices 4-6             |
| <b>DISCUSSION</b>                                                                                                                          |    |                                                                                                                                                                                                          |                            |
| Summary of evidence                                                                                                                        | 24 | Summarize the main findings including the strength of evidence for each main outcome; consider their relevance to key groups (e.g., healthcare providers, users, and policy makers).                     | Pages 7-8, 24              |
| Limitations                                                                                                                                | 25 | Discuss limitations at study and outcome level (e.g., risk of bias), and at review-level (e.g., incomplete retrieval of identified research, reporting bias).                                            | Page 25                    |
| Conclusions                                                                                                                                | 26 | Provide a general interpretation of the results in the context of other evidence, and implications for future research.                                                                                  | Page 26                    |
| <b>FUNDING</b>                                                                                                                             |    |                                                                                                                                                                                                          |                            |
| For peer review only - <a href="http://bmjopen.bmj.com/site/about/guidelines.xhtml">http://bmjopen.bmj.com/site/about/guidelines.xhtml</a> |    |                                                                                                                                                                                                          |                            |

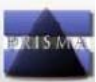

# PRISMA 2009 Checklist

1  
2  
3  
4  
5  
6  
7  
8  
9  
10  
11  
12  
13  
14  
15  
16  
17  
18  
19  
20  
21  
22  
23  
24  
25  
26  
27  
28  
29  
30  
31  
32  
33  
34  
35  
36  
37  
38  
39  
40  
41  
42  
43  
44  
45  
46  
47

|         |    |                                                                                                                                            |        |
|---------|----|--------------------------------------------------------------------------------------------------------------------------------------------|--------|
| Funding | 27 | Describe sources of funding for the systematic review and other support (e.g., supply of data); role of funders for the systematic review. | Page 2 |
|---------|----|--------------------------------------------------------------------------------------------------------------------------------------------|--------|

From: Moher D, Liberati A, Tetzlaff J, Altman DG, The PRISMA Group (2009). Preferred Reporting Items for Systematic Reviews and Meta-Analyses: The PRISMA Statement. PLoS Med 6(6): e1000097. doi:10.1371/journal.pmed1000097

For more information, visit: [www.prisma-statement.org](http://www.prisma-statement.org).

Page 2 of 2

For peer review only



# BMJ Open

## Sham treatment effects in manual therapy trials on back pain patients: a systematic review and pair-wise meta-analysis

|                                 |                                                                                                                                                      |
|---------------------------------|------------------------------------------------------------------------------------------------------------------------------------------------------|
| Journal:                        | <i>BMJ Open</i>                                                                                                                                      |
| Manuscript ID                   | bmjopen-2020-045106.R2                                                                                                                               |
| Article Type:                   | Original research                                                                                                                                    |
| Date Submitted by the Author:   | 15-Mar-2021                                                                                                                                          |
| Complete List of Authors:       | Lavazza, Carolina; AIMO, Research<br>Galli, Margherita; AIMO, Research<br>Abenavoli, Alessandra; AIMO, Research<br>Maggiani, Alberto; AIMO, Research |
| <b>Primary Subject Heading</b>: | Complementary medicine                                                                                                                               |
| Secondary Subject Heading:      | Research methods                                                                                                                                     |
| Keywords:                       | COMPLEMENTARY MEDICINE, STATISTICS & RESEARCH METHODS, Back pain < ORTHOPAEDIC & TRAUMA SURGERY                                                      |
|                                 |                                                                                                                                                      |

SCHOLARONE™  
Manuscripts



I, the Submitting Author has the right to grant and does grant on behalf of all authors of the Work (as defined in the below author licence), an exclusive licence and/or a non-exclusive licence for contributions from authors who are: i) UK Crown employees; ii) where BMJ has agreed a CC-BY licence shall apply, and/or iii) in accordance with the terms applicable for US Federal Government officers or employees acting as part of their official duties; on a worldwide, perpetual, irrevocable, royalty-free basis to BMJ Publishing Group Ltd ("BMJ") its licensees and where the relevant Journal is co-owned by BMJ to the co-owners of the Journal, to publish the Work in this journal and any other BMJ products and to exploit all rights, as set out in our [licence](#).

The Submitting Author accepts and understands that any supply made under these terms is made by BMJ to the Submitting Author unless you are acting as an employee on behalf of your employer or a postgraduate student of an affiliated institution which is paying any applicable article publishing charge ("APC") for Open Access articles. Where the Submitting Author wishes to make the Work available on an Open Access basis (and intends to pay the relevant APC), the terms of reuse of such Open Access shall be governed by a Creative Commons licence – details of these licences and which [Creative Commons](#) licence will apply to this Work are set out in our licence referred to above.

Other than as permitted in any relevant BMJ Author's Self Archiving Policies, I confirm this Work has not been accepted for publication elsewhere, is not being considered for publication elsewhere and does not duplicate material already published. I confirm all authors consent to publication of this Work and authorise the granting of this licence.

1  
2  
3  
4  
5  
6  
7  
8  
9  
10  
11  
12  
13  
14  
15  
16  
17  
18  
19  
20  
21  
22  
23  
24  
25  
26  
27  
28  
29  
30  
31  
32  
33  
34  
35  
36  
37  
38  
39  
40  
41  
42  
43  
44  
45  
46  
47  
48  
49  
50  
51  
52  
53  
54  
55  
56  
57  
58  
59  
60

**Title**

Sham treatment effects in manual therapy trials on back pain patients: a systematic review and pair-wise meta-analysis

**Author's name**

Carolina Lavazza (0000-0002-9907-6819),  
Margherita Galli (0000-0003-4050-3131), A  
Abenavoli (0000-0001-8941-2308), A  
Maggiani (0000-0002-7980-9405)

**Address for each author**

Separate each part of address with a comma  
(don't use a separate line for each part)  
Please include postcodes

Department of Research AIMO institute,  
Piazzale Santuario 7, 21047 Saronno, Italy,  
Carolina Lavazza associate professor,  
Department of Research AIMO institute,  
Piazzale Santuario 7, 21047 Saronno, Italy,

**Authors' names and positions**

Use same style of name as below title Please  
give one job position for each author, (under  
the relevant address) on separate line from  
author's name

Margherita Galli associate professor,  
Department of Research AIMO institute,  
Piazzale Santuario 7, 21047 Saronno, Italy,  
A Abenavoli associate professor, Department  
of Research AIMO institute, Piazzale  
Santuario 7, 21047 Saronno, Italy, A Maggiani  
professor

**Corresponding author**

Correspondence to:  
carolina.lavazza@docenti.aimoedu.it

**Copyright/license for publication:**

Carolina Lavazza The Corresponding Author of this article contained within the original manuscript which includes any diagrams & photographs within and any related or stand alone film submitted ("the Contribution") has the right to grant on behalf of all authors and does grant on behalf of all authors, a licence to the BMJ Publishing Group Ltd and its licencees, to permit this Contribution (if accepted) to be published in the BMJ and any other BMJ Group products and to exploit all subsidiary rights, as set out in our licence set out at:

<http://www.bmj.com/about-bmj/resources-authors/forms-policies-and-checklists/copyright-open-access-and-permission-reuse>.

Please tick **one or more** boxes as appropriate:

- I am the sole author of the Contribution.
- I am one author signing on behalf of all co-owners of the Contribution.
- The Contribution has been made in the course of my employment and I am signing as authorised by my employer.
- I am a US Federal Government employee acting in the course of my employment.
- I am not a US Federal Government employee, but some or all of my co-authors are.
- I am an employee of the UK Crown\* acting in the course of my employment
- I am a US Federal Government employee acting in the course of my employment.
- I am not a US Federal Government employee, but some or all of my co-authors are.
- I am an employee of the UK Crown acting in the course of my employment
- I am not an employee of the UK Crown acting in the course of my employment but some/all of my co-authors are.\*

\*Such authors should consult guidance and if necessary return any completed form.

**Licence:** The Corresponding Author has the right to grant on behalf of all authors and does grant on behalf of all authors, a worldwide licence to the Publishers and its licensees in perpetuity, in all forms, formats and media (whether known now or created in the future), to i) publish, reproduce, distribute, display and store the Contribution, ii) translate the Contribution into other languages, create adaptations, reprints, include within collections and create summaries, extracts and/or, abstracts of the Contribution, iii) create any other derivative work(s) based on the Contribution, iv) to exploit all subsidiary rights in the Contribution, v) the inclusion of electronic links from the Contribution to third party material where-ever it may be located; and, vi) licence any third party to do any or all of the above.

**Conflict of interest:** I have read and understood the BMJ Group policy on declaration of interests and declare the following interests: none

**Ethical approval:** not required.

**Transparency:** The manuscript's guarantor affirms that this manuscript is an honest, accurate, and transparent account of the study being reported; that no important aspects of the study have been omitted; and that any discrepancies from the study as planned (and, if relevant, registered) have been explained.

**Funding:** None.

1  
2  
3 **Competing interests:** No funding were provided for this project and authors did not received  
4 support from any organisation for the submitted work. Authors have no financial relationships  
5 with any organisations that might have an interest in this project and have no other  
6 relationships or activities that could appear to have influenced this review.  
7  
8  
9  
10  
11  
12  
13  
14  
15  
16  
17  
18  
19  
20  
21  
22  
23  
24  
25  
26  
27  
28  
29  
30  
31  
32  
33  
34  
35  
36  
37  
38  
39  
40  
41  
42  
43  
44  
45  
46  
47  
48  
49  
50  
51  
52  
53  
54  
55  
56  
57  
58  
59  
60

For peer review only

1  
2  
3  
4  
5  
6  
7  
8  
9  
10  
11  
12  
13  
14  
15  
16  
17  
18  
19  
20  
21  
22  
23  
24  
25  
26  
27  
28  
29  
30  
31  
32  
33  
34  
35  
36  
37  
38  
39  
40  
41  
42  
43  
44  
45  
46  
47  
48  
49  
50  
51  
52  
53  
54  
55  
56  
57  
58  
59  
60

## Acronyms

AE = adverse effects  
BP = back pain  
CI = confidence intervals  
CRB = Cochrane risk of bias  
CT = clinical trial  
MA = meta-analysis  
MCID = minimal clinically important difference  
MD = mean difference  
MT = manual therapies  
OMT = osteopathic manipulative treatment  
PROs = patient-reported outcomes  
RCT= randomised controlled trial  
RR = risk ratio  
SM = spinal manipulation  
ST = sham treatment

For peer review only

## ABSTRACT

### Objective:

To assess the effects and reliability of sham procedures in manual therapy (MT) trials in the treatment of back pain (BP) in order to provide methodological guidance for clinical trial development.

**Design:** systematic review and meta-analysis

### Methods and analysis:

Different databases were screened up to 20 August 2020. Randomized controlled trials (RCTs) involving adults affected by BP (cervical and lumbar), acute or chronic, were included. Hand contact sham treatment (ST) was compared to different MT (physiotherapy, chiropractic, osteopathy, massage, kinesiology and reflexology) and to no treatment. Primary outcomes were BP improvement, success of blinding and adverse effect (AE). Secondary outcomes were number of dropouts. Dichotomous outcomes were analysed using risk ratio (RR), continuous using mean difference (MD), 95% confidence intervals (CI). The minimal clinically important difference was 30 mm changes in pain score.

### Results:

24 trials were included involving 2,019 participants. Very low evidence quality suggests clinically insignificant pain improvement in favour of MT compared to ST (MD 3.86, 95% CI 3.29 to 4.43) and no differences between ST and no treatment (MD -6.04, 95% CI -16.68 to 4.59). ST reliability shows a high percentage of correct detection by participants (ranged from 46.7% to 83.5%), spinal manipulation being the most recognized technique. Low quality of evidence suggests that AE and dropout rates were similar between ST and MT (RR AE=0.84, 95% CI 0.55 to 1.28, RR dropouts= 0.98, 95% CI 0.77 to 1.25). A similar dropout rate was reported for no treatment (RR=0.79, 95% 0.51 to 1.23).

### Conclusions:

MT does not seem to have clinically relevant effect compared to ST. Similar effects were found with no treatment. The heterogeneousness of sham MT studies and the very low quality of evidence render uncertain these review findings. Future trials should develop reliable kinds of ST, similar to active treatment, to ensure participant-blinding and to guarantee a proper sample size for the reliable detection of clinically meaningful treatment effects.

**PROSPERO register:** CRD42020198301

[https://www.crd.york.ac.uk/prospero/display\\_record.php?RecordID=198301](https://www.crd.york.ac.uk/prospero/display_record.php?RecordID=198301)

1  
2  
3  
4  
5  
6  
7  
8  
9  
10  
11  
12  
13  
14  
15  
16  
17  
18  
19  
20  
21  
22  
23  
24  
25  
26  
27  
28  
29  
30  
31  
32  
33  
34  
35  
36  
37  
38  
39  
40  
41  
42  
43  
44  
45  
46  
47  
48  
49  
50  
51  
52  
53  
54  
55  
56  
57  
58  
59  
60

## Strengths and limitations of this study

### Strengths

This systematic review and pair-wise meta-analysis:

- summarises existing evidence on the effect, reliability and application of hand contact ST in MT RCTs;
- gives suggestions for researchers on conducting methodical RCT in MT using a reliable sham procedure.

### Limitation

- Settings and practitioner influences on ST effects were not analysed due to lack of data;
- The number of studies included was insufficient to assess the impact of lack of blinding on ST effects.

For peer review only



## Background

In Clinical Trials (CT), a placebo is commonly used as a control therapy to evaluate the clinical effectiveness of the treatments tested. (1) Placebo has been defined as “an inert substance or sham procedure that is provided to research participants with the aim of making it impossible for them, and usually the researchers themselves, to know who is receiving an active or inactive intervention.” (2) Placebo interventions are methodological tools used to treat participants in the study arm and the control arm in exactly the same way, except that the study group receives an active substance and the control group does not.

In Europe, its use in pharmacological CT has been regulated by CT Regulation No. 536/2014. According to this regulation, placebo must be treated as an Investigatory Medical Product (IMP) and as such it has to meet certain standards in order to ensure quality, guarantee patient safety and the reliability of the study results. (3)

The regulatory aspects of trials involving Manual Therapies (MT) are very different. Although such studies might be influenced by the type of placebo provided, no clear guidelines or regulations have been developed to ensure the credibility of trial results and patient safety. MT is a clinical approach used by different physical therapists and involves hands-on techniques to manipulate, mobilise and massage the body tissues. This type of therapy can help relieve pain and stiffness, promote relaxation of soft-tissues, enhance blood supply to tissues and increase mobility of joint structures. (4)

In MT trials, placebo treatment is often provided in different modalities from trial to trial although the manual techniques or treatments tested are the same. A true placebo does not exist for MT and testing the effectiveness of MT requires a sham intervention. For instance, sham treatment (ST) is commonly administered as a light touch in the site of pain or as an active treatment in a different site, (5) with no clear criterion. Such light touch might in fact have a health effect and there is no evidence as to its ineffectiveness. Touch itself could have a positive outcome on health (6) and active treatments could have an analgesic reflex on pain even if administered elsewhere in the body. (7)

Placebo effect, also called placebo response, is the reported improvement in symptoms among patients that occurs as a result of the placebo administration. Since a placebo has no inherent therapeutic power, it cannot cure the disease but it may contribute to the relief of patients' symptoms such as pain. (8) Additionally, placebo might be related to an adverse effect called nocebo. It has been estimated that up to 26% of patients in randomized control trials (RCTs) discontinue placebo due to adverse effects (AE). (9)

It is thought that these psychobiological phenomena may be related to the overall therapeutic context, such as treatment environment, individual patient and clinician factors (e.g. beliefs, desire for symptom changes), as well as the patient's expectations of improvement and prior experiences of the treatment. (10-13)

In pharmacological trials this overall therapeutic context and its influence on placebo response has been widely studied. (11) Less evidence is present for MT trials, where the tactile interaction could be considered as an important characteristic of this therapeutic context. (14, 15) Pharmacological trials avoid the influence of clinicians' beliefs by using a placebo that ensures both patient and clinician blinding to treatment allocation, but, in MT trials, the blinding of clinicians is impossible to achieve. The best alternative in this type of trial is the use of a ST that mimics the active treatment and aims at blinding of participants.

Another important factor that has to be taken into account is that RCTs involving MT usually use patient-reported outcomes (PROs) - such as pain - as primary outcomes. Studies suggested that physical placebo treatments might have a greater effect on these types of outcome compared to pharmacological placebo and that this effect might be a consequence of physical contact. (1, 16, 17)

Moreover, especially when subjective PROs outcomes are used, the absence of clinician blinding could also increase the possibility of performance bias. (14)

Therefore, a better understanding of sham procedures in manual treatment would be fundamental to define the real difference in efficacy between manual and sham treatment, with a better knowledge of the effect of manual contact on PROs such as pain relief and dropouts.

The role of placebo – referred to as sham therapy in this review - in MT trials is still very confused and the lack of guidelines allows huge discrepancies in its use in RCTs. Additionally, the reliability of sham procedures in MT trials has been rarely evaluated.

A clear definition of placebo effect could improve trial design, implementing studies with a proper power and sample size, defining clinical relevance of MT and giving more reliability to study results.

The aim of this systematic review with pair-wise meta-analyses is to evaluate the use of ST in MT trials in order to analyse the effects, possible harm and the reliability of different kinds of sham procedures provided in RCTs involving MT. A systematic review could help to define sham treatment standards to be applied in CT in order to guarantee methodological quality and patient safety.

### Objective

To assess the benefits, potential harm and reliability of ST in MT RCTs in the treatment of back pain - both cervical and lumbar - in order to provide methodological guidance for clinical trial development.

## Methods

This systematic review and meta-analysis was performed following the Preferred Reporting Items for Systematic Reviews (PRISMA). (18)

The protocol registration was performed in PROSPERO (<http://www.crd.york.ac.uk/PROSPERO/>) and review registration number is **CRD42020198301**.

### Criteria for considering studies for this review

Only RCTs were included in this review. Quasi-randomised trials in which allocation was not strictly random (e.g. date of birth or toss of a coin) were excluded. No restrictions were applied to language or setting.

Studies were considered eligible if they included adult participants with acute or chronic back pain including coccyx, lumbar, dorsal and cervical. Trials where pain was related to muscular conditions, articular disorders (such as osteoarthritis) or spinal disc herniation were included. Trials where musculoskeletal diseases were secondary to other pathologies (e.g. amyotrophic lateral sclerosis, fibromyalgia etc.) were excluded.

1  
2  
3 Trials where pain was related to fracture, surgery, dysmenorrhoea, post-partum or pregnancy,  
4 headache or dizziness were excluded.

5 This review involved all types of ST that include **hand contact** provided by all kinds of physical  
6 therapists. Studies where ST was provided by machines (such as inactive ultrasound) were  
7 excluded. This choice was based on the fact that many MT used detuned ultrasound as control.  
8 This type of sham was not considered adequate for MT trials where active treatment is  
9 provided by hand contact. Therefore, these studies were excluded.

10 All trials that involved hand contact ST as light touch or a manual treatment in a different site  
11 were included.

12 ST was compared to other MT provided by any type of health care provider such as:  
13 physiotherapist, chiropractor, osteopath, massage therapist, kinesiologist and reflexologist.  
14 To assess if touch itself could have a positive health effect, ST was also compared to no  
15 treatment. Physiotherapeutic exercises were included in the analysis only if associated with  
16 manual treatment.

17 The use of active co-interventions such as oral NSAIDs or other active treatments was accepted  
18 if used in all trial arms. Trials with more than two arms of intervention were included, but only  
19 data from interested arms were extracted.

## 20 21 22 23 24 25 26 **Outcomes**

27 Primary outcomes were pain intensity on a validated scale, success in the blinding of  
28 participants and AE. Secondary outcomes were number of dropouts.

29 Whenever the meta-analysis could not be performed, a narrative summary of the outcomes has  
30 been provided. Outcomes were divided into short ( $\leq 2$  months), medium ( $\leq 4$  months) and long-  
31 term ( $\geq 6$  months). Data were extracted and analysed based on the time closest to these  
32 intervals.  
33  
34  
35  
36  
37

## 38 **Information sources**

39 Search strategy (**Appendix 1**) was adapted to the different databases by an experienced  
40 information specialist.

41 RCTs were identified in different databases (up to 20 August 2020): MEDLINE, Embase, CINAHL,  
42 SPORTDiscus, PEDro, World Health Organization Clinical Trials Registration Platform, Index to  
43 Chiropractic Literature, Cochrane central register of controlled trials (CENTRAL), Clinical trials  
44 registry and metaRegister of Controlled Trials (mRCT).

45 Researchers of unpublished trials, but completed and registered, were contacted by *CL* to  
46 obtain data.  
47  
48  
49  
50

51 The search in PROSPERO, in the Cochrane Library and in PubMed (clinical queries) was  
52 performed to evaluate the presence of on-going or recently completed systematic reviews.  
53 Guidelines from different organisations (e.g. National Council for Osteopathic Research etc.)  
54 were reviewed and references from relevant publication were analysed.  
55  
56

## 57 **Data collection and analysis**

1  
2  
3 Search results were screened by two independent reviewers who identified all the potentially  
4 eligible trials based on title and abstract. Full-texts of all the selected articles were screened  
5 firstly for inclusion. If full-text was not available, or the trial was completed but not published,  
6 CL contacted the authors in order to obtain the information needed or used the document  
7 delivery service of the 3Bi Biella library.  
8

9 Uncertainty about the inclusion of a study was discussed by the two reviewers. If no agreement  
10 was reached by the two reviewers a third reviewer (AM) was asked for their opinion.  
11 The selection process was recorded and reported through a PRISMA flow diagram.  
12  
13

### 14 **Data extraction and management**

15  
16 Data extraction was performed by two reviewers with a tested pre-defined form. Data  
17 extracted were related to settings, type of study, participants characteristics (such as  
18 localization and duration of pain, pain score at baseline, previous similar treatment),  
19 interventions, outcomes used in the meta-analysis and other relevant data such as difference in  
20 ST and active treatment or funding. (**Appendix 2**)  
21  
22  
23  
24

### 25 **Risk of bias in individual studies**

26  
27 Bias risk was assessed by CL and agreed by MG using the Cochrane Risk of bias (CRB) tool. (19)  
28 This tool was used to assess selection bias, performance bias, attrition bias, reporting bias and  
29 other biases.  
30

31 Each possible risk was evaluated as "high", "medium" or "low" by CL and a revision of the  
32 judgments was performed by MG. RevMan 5.3.5 was used for the graphic representation of  
33 each risk. The CRB tool results were then converted to AHRQ Standards to assess the quality of  
34 the study (Good, Fair, and Poor). Trials were judged as good quality when bias risk was judged  
35 as low, studies with fair quality were trials where at least one criterion was high risk, while poor  
36 quality studies were trials with two or more criteria with high or unclear risk.  
37  
38  
39

### 40 **Assessment of reporting biases**

41  
42 Funnel plots were created to explore reporting bias, whenever more than 10 studies were  
43 included in the meta-analysis. Furthermore, for each study, an analysis of possible conflicts of  
44 interest and funding sources was performed.  
45  
46  
47

### 48 **Summary measures**

49  
50 Dichotomous outcomes, such as AE (occurred or not), were analysed using risk ratio (RR) with  
51 95% confidence intervals (CI).  
52

53 Continuous outcomes, such as back pain on VAS scale, were evaluated using mean difference  
54 (MD) between ST and the MT/no treatment group with 95% CI and the standard deviation (SD).  
55 The minimal clinically important difference (MCID) between pre- and post-treatment was taken  
56 as 30 mm changes in 100 mm pain score. (20-22) These values were used for the interpretation  
57 of the clinical significance of the findings.  
58

59 Success of blinding was reported with a percentage of patients guessing correctly the treatment  
60 allocation.

1  
2  
3 In this review the unit of analysis was the participant.  
4  
5

### 6 7 **Assessment of heterogeneity**

8  
9 The presence of heterogeneity was assessed with a visual inspection of the forest plots and  
10 through an inconsistency level test ( $I^2$ ).  
11 Cochrane Handbook was used for threshold interpretation: heterogeneity was considered as  
12 unimportant for values of  $I^2$  between 0% and 40%, as moderate for values between 30% and  
13 60%, as substantial for values between 50% and 90%, and considerable for values between 75%  
14 to 100%. (23)  
15  
16

### 17 18 19 **Synthesis of results**

20  
21 Meta-analysis of pain score, AE and dropout rates were performed using RevMan 5.3.5  
22 whenever possible. The meta-analyses compared all kinds of ST with all types of MT and to no  
23 treatment. Random-effect model was used when a substantial inconsistency was present ( $I^2$ =  
24 50-90%). (20) When considerable heterogeneity was present ( $I^2$ >75%) and could not be  
25 explained by clinical or methodological diversity, the results have been presented narratively.  
26 The statistical significance of measured effects was determined evaluating the p-value and 95%  
27 CI.  
28  
29

### 30 31 32 **Additional analyses**

33  
34 Different subgroup analyses were planned in the protocol such as on ST type provided (applied  
35 locally or in different sites from pain), type of manual technique tested (single or multiple  
36 techniques) and localization of back pain. However, due to the small number of studies  
37 included in this review, only a few subgroup analyses were conducted on follow-up periods.  
38 Sensitivity analysis was conducted for the primary outcomes to assess the effects of skewed  
39 and imputed data on the effect measure. These analyses are reported as appendices.  
40  
41

### 42 43 44 **Summarizing results and assessing the quality of the evidence**

45  
46 The quality of evidence for each outcome was evaluated with the GRADE approach by two  
47 independent authors and any disagreement was discussed. The quality for each effect measure  
48 was judged as high, moderate, low or very low. (19) The GRADE approach was used to assess  
49 the quality of the key outcomes. The software GRADEpro (<https://gradepr.org>) was used to  
50 import data from RevMan 5.3.5 and to create “summary of findings tables”.  
51 The following outcomes were chosen to be presented: pain scores at short-term, AE and  
52 dropouts.  
53  
54

### 55 56 57 58 59 **Patient and Public Involvement**

1  
2  
3  
4  
5  
6  
7  
8  
9  
10  
11  
12  
13  
14  
15  
16  
17  
18  
19  
20  
21  
22  
23  
24  
25  
26  
27  
28  
29  
30  
31  
32  
33  
34  
35  
36  
37  
38  
39  
40  
41  
42  
43  
44  
45  
46  
47  
48  
49  
50  
51  
52  
53  
54  
55  
56  
57  
58  
59  
60

There was no involvement of patients or public during the outline of this project. The differences noted between therapies tested on primary pain outcome were those clinically meaningful to patients.

## Results

### **Figure 1: PRISMA flow diagram**

#### **Included studies**

**Table 1** shows a summary of the main characteristics of included studies.

24 studies were included in this review (**Figure 1**), one study had a 2x2 factorial design, (24) eight studies had multiple arms. (25-32) Most of the studies were conducted in physical therapy clinics, in 13 different countries. Three trials did not report in which clinical setting they were conducted. (29, 33, 34)

Eight trials were conducted in Europe, (27, 28, 30, 35-39) five in the United States, (24, 25, 31, 40, 41) three studies in Brazil, (42-44) one in the UK, (26) Egypt, (32) Japan (45) and Australia. (46)

No ongoing or unpublished trials were found.

#### **Population**

The included trials randomized a total of 2,019 participants, the majority of studies (N=18) were small with a median of 50 participants and a range from 15 to 455.

Most trials included middle aged patients (mean 39.9 range from 18 to 73) with a mean BMI of 21.7 kg/m<sup>2</sup>.

The majority of studies included both genders, with a percentage of male that ranged from 19% to 80%. Two trials included only male, (38, 44) one study included only female participants. (42)

16 trials enrolled participants with low back pain (LBP), eight included participants with cervical pain (CP). (26, 33, 35-37, 40-42)

The majority of trials (N=18) included participants with unspecified cause of back pain. Disk herniation was considered in three trials. (27, 30, 44)

Duration of symptoms were unassessed in eight trials, nine studies included participants with chronic pain, some included participants with both acute and chronic pain.

Participants with experience of the tested treatment were included in eight trials (24, 29, 31, 32, 35, 37, 42, 43) and excluded in four. (26, 36, 39, 41) The remaining studies did not provide this information.



## Interventions

Interventions deferred for number of sessions and number of techniques applied. Eleven trials used a single therapy session with a single technique performed in eight of those trials. Trials with different therapy sessions ranged from five (25, 26, 30) to 20 (27) sessions once a week.

## Sham treatment

ST was provided by a hand contact on the area of pain in 19 studies, and five studies provided ST in a different area from where the pain was located. (27, 35, 43, 45, 46)

In trials providing spinal manipulation, as inactive treatment the majority of authors used the similar placement of hands on participants without any force applied. (40-42, 44) Two trials used a ST with similar forces applied in different directions. (25, 32) One trial did not specify the inactive manipulation applied. (29)

In trials that provided multiple techniques in the same treatment session (such as osteopathic treatment, spinal mobilization and physiotherapy) the ST was administered with different techniques that mimed active treatments using light touch or light tractions.

Only one trial compared one single sham technique with both single active technique and multiple treatment techniques. In this case only data of the first arm were extracted. (37)

## Manual and controls treatments

Different manual treatments were provided:

- Spinal manipulation (SM)/chiropractic (7 studies, 567 participants)
- Osteopathy (5 trials, 645 participants)
- Kinesiology (one trial, 58 participants)
- Articular mobilizations (6 trials, 445 participants)
- Muscular release (5 trials, 304 participants)

Four trials with multiple arms compared ST to no intervention (379 participants) (25-27, 31) and one to muscle relaxant group (156 participants). (29)

The manual treatment was generally applied in the area of pain, some trials used techniques additionally in other areas. Just one trial using reflexology provided both manual therapy and sham in a different zone. (39)

Characteristics of the practitioner who administered treatments were provided by 16 trials. Trials involved physiotherapists (N=8), physical therapists (N=4), osteopaths (N=3) and osteopathic students (N=1). Only seven studies provided information on years of practice experience of the physicians involved ranging from six to 17 years. (30, 33, 35-37, 40, 42, 44) The gender of practitioners was indicated in only three trials. (26, 30, 37)

**Table 1:** summary of main characteristics of included studies

| Study ID                   | N° of participants | Symptoms duration          | Pain localization | Technique tested ( <i>site of application</i> )                                         | Type of sham procedure                                       | Other arms                     | Follow-up                                                |
|----------------------------|--------------------|----------------------------|-------------------|-----------------------------------------------------------------------------------------|--------------------------------------------------------------|--------------------------------|----------------------------------------------------------|
| Antonilos-Campillo PJ 2014 | 40                 | Not reported               | Cervical          | Soft-tissue ( <i>cervical region</i> )                                                  | Soft mobilization of lower limbs                             | None                           | No follow-up (outcomes collected after the intervention) |
| Bialosky J 2014            | 110                | > 4 months                 | Lumbar            | Spinal Manipulation (SM) ( <i>lumbar spine</i> )                                        | Ineffective force applied on lumbar spine                    | No treatment group             | 2 weeks                                                  |
| Cleland JA 2005            | 36                 | >2 months                  | Cervical          | SM ( <i>thoracic spine</i> )                                                            | Ineffective force applied on thoracic spine                  | None                           | No follow-up (outcomes collected after the intervention) |
| Eardley S 2013             | 58                 | > 3 years                  | Lumbar            | Kinesiology ( <i>spine</i> )                                                            | Protocol of ineffective techniques in the site of pain       | No treatment group             | 7 weeks                                                  |
| Erdogmus S 2007            | 120                | $\geq 1.4$ weeks           | Lumbar            | Physiotherapy ( <i>Exercises of the spine and articular mobilisation techniques</i> )   | Neck massage                                                 | No treatment group             | 1.5 years                                                |
| Hall T 2004                | 24                 | Not reported               | Lumbar            | BLR technique ( <i>lower limbs</i> )                                                    | Soft-tissue manipulation of the foot                         | None                           | 24 hours                                                 |
| Haller H 2016              | 54                 | > 7 months                 | Cervical          | Cranio-sacral therapy ( <i>head</i> )                                                   | Ineffective touch of head                                    | None                           | 3 months                                                 |
| Hansen F 1993              | 168                | $\geq 18$ days             | Lumbar            | Physiotherapy ( <i>exercises of lumbar spine and abdomen, soft-tissues techniques</i> ) | Intermittent traction of the spine                           | Intensive back muscle training | 1 year                                                   |
| Hidalgo B 2015             | 32                 | Not reported               | Lumbar            | Articular mobilization ( <i>lumbar spine</i> )                                          | Ineffective mobilization forces applied on lumbar spine      | None                           | 2 weeks                                                  |
| Hoiriis K 2004             | 156                | $\geq 2,3$ weeks           | Lumbar            | SM ( <i>spine</i> )                                                                     | Ineffective force applied on spine                           | Medical treatment              | 4 weeks                                                  |
| Klein R 2003               | 61                 | >1 month and <5 years      | Cervical          | Strain-counterstrain techniques ( <i>cervical spine</i> )                               | Ineffective force applied on cervical spine                  | None                           | No follow-up (outcomes collected after the intervention) |
| Kogure A 2015              | 179                | > 12 months and < 10 years | Lumbar            | AKA-H ( <i>sacro-iliac joint</i> )                                                      | Ineffective force applied on sacro-iliac joint               | None                           | 6 months                                                 |
| Krekoukias G 2017          | 50                 | Not reported               | Lumbar            | Articular mobilization techniques ( <i>lumbar spine</i> )                               | Hand contact with lumbar skin placement without any movement | Exercise plus TENS             | 5 weeks                                                  |



|                                     |     |                  |          |                                                                                    |                                                                                                                        |                    |                                                          |
|-------------------------------------|-----|------------------|----------|------------------------------------------------------------------------------------|------------------------------------------------------------------------------------------------------------------------|--------------------|----------------------------------------------------------|
| <b>Lascurain-Aguirrebena I 2018</b> | 40  | Not reported     | Cervical | Articular mobilization ( <i>Cervical spine</i> )                                   | Ineffective force applied on cervical spine                                                                            | None               | No follow-up (outcomes collected after the intervention) |
| <b>Licciardone J 2003</b>           | 91  | $\geq 3$ months  | Lumbar   | Osteopathic manual treatment (OMT) ( <i>all body</i> )                             | Protocol of light touch techniques similar to OMT applied to all body                                                  | No treatment group | 6 months                                                 |
| <b>Licciardone J 2013</b>           | 455 | $\geq 3$ months  | Lumbar   | Osteopathic manual treatment (OMT) – ( <i>all body</i> )                           | Protocol of light touch techniques similar to OMT applied to all body                                                  | None               | 8 weeks                                                  |
| <b>Pires FP 2015</b>                | 32  | > 3 months       | Cervical | SM ( <i>thoracic spine</i> )                                                       | Ineffective force applied on thoracic spine                                                                            | None               | 72 hours                                                 |
| <b>Quinn F 2008</b>                 | 15  | Not reported     | Lumbar   | Reflexology ( <i>foot</i> )                                                        | Foot massage with less pressure and in different reflex point (not related to the spine)                               | None               | 18 weeks                                                 |
| <b>Selkow M 2009</b>                | 20  | 1-6 weeks        | Lumbar   | Muscular energy technique ( <i>anterior superior iliac spine and lower limbs</i> ) | Practitioner hand positioned as active treatment, but participant rested for 30 seconds without any active contraction | None               | 24 hours                                                 |
| <b>Senna MK 2011</b>                | 93  | $\geq 13$ months | Lumbar   | SM ( <i>lumbar spine</i> )                                                         | Ineffective force applied on lumbar spine                                                                              | Maintained SM      | 10 months                                                |
| <b>Sillevis R 2010</b>              | 100 | $\geq 23$ months | Cervical | SM ( <i>thoracic spine</i> )                                                       | Ineffective force applied on thoracic spine                                                                            | None               | No follow-up (outcomes collected after the intervention) |
| <b>Silva A 2019</b>                 | 28  | >3 months        | Cervical | Osteopathic visceral treatment ( <i>abdomen</i> )                                  | Hand contact on umbilical region without any movement                                                                  | None               | 7 days                                                   |
| <b>Veira-Pellez F 2014</b>          | 40  | Not reported     | Lumbar   | SM ( <i>lumbar/sacral spine</i> )                                                  | Ineffective force applied on lumbar/sacral joints                                                                      | None               | No follow-up (outcomes collected after the intervention) |
| <b>Younes M 2017</b>                | 17  | < 3 months       | Lumbar   | OMT ( <i>all spine</i> )                                                           | Placebo mimed active treatment with an ineffective force applied.                                                      | None               | 7 days                                                   |

## Risk of bias in included studies

**Figure 2** shows risks of bias.

Blinding of participants and assessors will be described due to the nature of this review.

According to AHRQ standards of CRB tool, (19) the majority of trials were judged as poor quality (N=22). Good quality was conferred on only two studies. (36, 45)

The random sequence and allocation concealment were adequately reported in 71% and 63% of trials respectively.

The lack of blinding of participants was the most common bias and was judged as high risk in 38% of studies, while 38% were considered as unclear risk.

The reasons for this judgment were mainly related to trials involving spinal manipulations. These studies used a technique which can be easily recognized by patients as active treatment for the popping sound emitted by joints. Additionally, these trials involved participants who could have already received this type of treatment, making the masking of technique almost impossible.

Blinding of outcomes was evaluated mainly as unclear risk in 46% of trials. Only two trials reported the strategies adopted to guarantee assessor blinding. (28, 32)

Incomplete outcome data was the least common bias risk with 80% of trials judged as low risk.

Reporting bias was evaluated as unclear in 55% of trials where registration number and trial protocol were not reported or found.

Other bias occurred was generally considered as high risk for baseline differences of the population in 30% of trials.

**Figure 2:** Risk of bias summary. Review authors' judgements about each risk of bias item for each included study.

## Effects of intervention

**Table 2** summaries treatment effects and GRADE quality of the evidence for all comparisons.

For peer review only

**Table 2:** summary of findings of treatment effects and certainty of the evidence (GRADE) included for all comparisons.

### 1. Sham treatment (ST) compared to Manual Therapies (MT)

**Patient or population:** back pain

**Intervention:** ST

**Comparison:** MT

| Outcomes                                                                         | Anticipated absolute effects* (95% CI) |                                                      | Relative effect (95% CI)         | No of participants (studies) | Certainty of the evidence (GRADE) | Comments                                                                                                                                                                                                                                                                            |
|----------------------------------------------------------------------------------|----------------------------------------|------------------------------------------------------|----------------------------------|------------------------------|-----------------------------------|-------------------------------------------------------------------------------------------------------------------------------------------------------------------------------------------------------------------------------------------------------------------------------------|
|                                                                                  | Risk with MT                           | Risk with ST                                         |                                  |                              |                                   |                                                                                                                                                                                                                                                                                     |
| <b>Pain improvement</b> assessed with: VAS score<br>Scale from: 0 to 100         |                                        | MD <b>3.86 higher</b><br>(3.29 lower to 4.43 higher) | -                                | 805<br>(15 RCTs)             | ⊕○○○<br>VERY LOW <sup>a,b</sup>   | A small effect, not clinically relevant, in pain improvement was detected in favour of MT. This analysis excluded two trials (one suspected of publication bias, one used a different scale) which increased heterogeneity levels but did not affect overall efficacy meaningfully. |
| <b>Adverse events</b> assessed with: number of AE occurred                       | 144 per 1.000                          | <b>121 per 1.000</b><br>(79 to 184)                  | <b>RR 0.84</b><br>(0.55 to 1.28) | 531<br>(6 RCTs)              | ⊕⊕○○<br>LOW <sup>a</sup>          | Pooled data from 6 studies did not show any difference in AE occurrence between ST and MT.                                                                                                                                                                                          |
| <b>Dropouts rate</b> assessed with: number of participants that leaved the study | 174 per 1.000                          | <b>171 per 1.000</b><br>(134 to 218)                 | <b>RR 0.98</b><br>(0.77 to 1.25) | 1238<br>(11 RCTs)            | ⊕⊕○○<br>LOW <sup>a</sup>          | Pooled data from 11 trials did not show difference in dropout rate between ST and MT.                                                                                                                                                                                               |

### 2. ST compared to no treatment

**Patient or population:** back pain

**Intervention:** ST

**Comparison:** No treatment

| Outcomes                                                                         | Anticipated absolute effects* (95% CI) |                                                      | Relative effect (95% CI)         | No of participants (studies) | Certainty of the evidence (GRADE) | Comments                                                                                                                         |
|----------------------------------------------------------------------------------|----------------------------------------|------------------------------------------------------|----------------------------------|------------------------------|-----------------------------------|----------------------------------------------------------------------------------------------------------------------------------|
|                                                                                  | Risk with no treatment                 | Risk with ST                                         |                                  |                              |                                   |                                                                                                                                  |
| <b>Pain improvement</b> assessed with: VAS score<br>Scale from: 0 to 100         |                                        | MD <b>5.84 lower</b><br>(20.46 lower to 8.78 higher) | -                                | 177<br>(3 RCTs)              | ⊕○○○<br>VERY LOW <sup>a,c,d</sup> | Pooled data from three trials, highly inconsistent, showed no differences between ST and no treatment group in pain improvement. |
| <b>Dropouts rate</b> assessed with: number of participants that leaved the study | 150 per 1.000                          | <b>123 per 1.000</b><br>(65 to 233)                  | <b>RR 0.82</b><br>(0.43 to 1.55) | 225<br>(4 RCTs)              | ⊕○○○<br>VERY LOW <sup>a,d</sup>   | Very low quality of evidence suggests no differences in dropout rate between ST and no treatment.                                |

\*The risk in the intervention group (and its 95% confidence interval) is based on the assumed risk in the comparison group and the relative effect of the intervention (and its 95% CI).

CI: Confidence interval; MD: Mean difference; RR: Risk ratio

**GRADE Working Group grades of evidence**

**High certainty:** We are very confident that the true effect lies close to that of the estimate of the effect

**Moderate certainty:** We are moderately confident in the effect estimate: The true effect is likely to be close to the estimate of the effect, but there is a possibility that it is substantially different

**Low certainty:** Our confidence in the effect estimate is limited: The true effect may be substantially different from the estimate of the effect

**Very low certainty:** We have very little confidence in the effect estimate: The true effect is likely to be substantially different from the estimate of effect

**Explanations**

a. The majority of trials were judged as poor quality according to AHRQ standards.

b. Most of the studies were small trial.

c. Heterogeneity levels at 80%.

d. Number of participants < 400

For peer review only

## Sham treatment versus other manual therapies

### Pain

The following outcomes on back pain are presented with a 100 mm visual analogue scale, 0 to 100; higher scores refer to worse pain. Trials using a 10mm scales were converted to 100mm scores.

The comparison between ST and MT was performed in 17 studies. One trial used a different scale and data were obtained with a conversion formula. (27) Data from seven studies could not be extracted.

The meta-analysis at short-term showed substantial heterogeneity levels using a random-effects model. To further investigate inconsistency levels, a sensitivity analysis excluding two trials was performed. One trial used a different validated scale, (25) while the other was suspected of publication bias. (30) This thought was verified with a funnel plot, which showed an asymmetric distribution with the inclusion of these two studies (**Appendix 3**). This sensitivity analysis did not influence overall effectiveness results, but inconsistency levels decreased considerably at short-term. It can be deduced that a possible cause of heterogeneity was found (**Full analysis in appendix 4**).

The sensitivity analysis using a fixed-model at short-term showed a slight difference, not clinically meaningful, between ST and MT in favour of MT on pain outcome (MD 3.86, 95%CI 3.29 to 4.43, 805 participants,  $I^2=42%$ ,  $p<0.0001$ , very low quality of evidence downgraded two levels for very serious risk of bias and imprecision) (**Figure 3**).

**Figure 3:** Forest plot of comparison ST versus MT in back pain outcome at short-term.

Comparisons between ST and MT at medium and long-term could not be performed due to substantial levels of heterogeneity found using a random-effects model. The heterogeneity levels were not explainable by clinical or methodological diversities within trials (medium-term  $I^2=91%$   $P<0.0001$ , long-term  $I^2=81%$   $P=0.005$ ) (**Appendix 4.1**).

### Success of blinding

Success of blinding was evaluated in five trials; one did not report the results. (30)

Patients were asked to assess if they understood their treatment allocations. Due to the type of data extracted (percentage of correct guessing) meta-analysis was not performed and results are reported descriptively.

Two trials compared ST with SM, these trials showed a correct perception of treatment allocation that ranged from 63.5% (25) to 83.5%. (29) In this last study patients were considered eligible if they had already received SM.

One trial compared ST to an articular mobilization technique. 54.5% participants correctly guessed the treatment allocation. (46)

Participants of one study that compared ST to reflexology had the lowest percentage of correct detection of allocation (46.7%). Participants in this trials did not know about the type of treatment tested. (39)

## Dropouts

Pooled data from 11 trials at the last follow-up suggested no difference in dropouts rate between ST and MT at the end of the trials (105/612 compared to 109/626; RR 0.98, 95% CI 0.77 to 1.25; 1238 participants,  $I^2=0\%$ ,  $P=0.90$ ; low quality of evidence downgraded two levels for high risk of bias) (**Figure 4**).

**Figure 4:** Forest plot of comparison ST versus MT in number of dropouts outcome

## Adverse effects

AE were generally under-reported, six trials were included in the meta-analysis. (26-28, 36, 37, 45)

Two trials reported AE overall occurrence without specified event rates in the groups.(24, 32)

AE were predominantly minor and lasted for two/three days after treatment, in the majority of trials transient worse pain, tiredness, muscle weakness and transient headache were reported. (26, 36, 37, 45)

Senna M 2011 reported the most common AE were local discomfort and tiredness but no serious complications were noted. (32)

Haller H 2016 reported two patients dropping out from the trial for recurrent headache after treatments, both Haller H and Klein R 2013 reported dizziness of one patient. (36, 37)

Licciardone J 2013 reported 27% of patients with AE, 2% had serious AE not related to study interventions. (24)

Overall results showed no clear difference in AE occurrence between ST and MT (32/267 compared to 38/264; RR 0.84, 95% CI 0.55 to 1.28; 531 participants,  $I^2=26\%$ ,  $P=0.42$ ; low quality of evidence downgraded two levels for inconsistency) (**Figure 5**).Senna and Licciardone were excluded from analysis because they did not provide separate data for each group.

**Figure 5:** Forest plot of comparison ST versus MT in number of adverse events outcome at short-term

## Sham versus no treatment

### Pain

Four studies compared ST to no intervention, three were included in random-effect meta-analysis at short-term. (25-27, 29) Data from one trial could not be extracted. (31) Pooled data showed the presence of significant heterogeneity, therefore results are reported narratively: two trials showed no difference between ST and no treatment on pain outcome, while Eardley S. 2013 showed an effect in favour of ST (pooled data from 3 trials: MD -5.84, 95% CI from -20.46 to 8.78, 252 participants,  $I^2=85\%$ ,  $P=0.43$ ). The exclusion of Erdogmus S 2013 (that used a different scale) did not affect the results of effectiveness neither decreased levels of heterogeneity (MD -10.83, 95% CI -32.44 to 10.79,  $I^2=84\%$ ,  $P=0.33$ ) (**Appendix 5**).

### Dropouts

No differences were shown in the fixed-effect meta-analysis on dropout rate between ST and no intervention in four trials (14/112 compared to 17/113; RR 0.82, 95% CI 0.43 to 1.55; 225 participants,  $I^2=0\%$ ,  $P=0.54$ ; very low quality of evidence downgraded two levels for very serious risk of bias and imprecision) (**Figure 6**).

**Figure 6:** Forest plot of comparison ST versus no treatment in number of dropouts outcome

### Adverse effects

Of the four studies comparing ST to no intervention, only two reported AE. One, Eardley S 2013, did not evaluate AE occurred in the no treatment group while Erdogmus C 2007 reported that 10/40 in the no intervention group and 11/40 in ST group turned to other therapies for complains.



## Discussion

Results show a small, not clinically meaningful effect in favour of MT for short-term pain relief compared with ST. However, the quality of evidence is very low, suggesting that the true effect may be different from the estimated effect. Substantial levels of heterogeneity within the four studies analysed, showed no differences between ST and no treatment in pain reduction. Success of blinding was reported in four trials that compared ST to MT, with a high percentage of correct detection of treatment allocations by participants. AE were generally under-reported, with a similar rate of occurrence between sham and MT accompanying low levels of heterogeneity. Only one study reported AE in its no treatment group with no significant difference from ST.

SM techniques were the treatment most evaluated (N=7). These techniques are highly recognizable by patients for a popping sound emitted by the column during their performance. (47) The fact that participants enrolled in these trials were eligible despite having already received SM, threatens the validity of blinding. This thought is strengthened by the high percentage of participants who recognized treatment allocation in this kind of trial (from 63.5% to 83.5%). (25, 29) Additionally, five trials applied ST in a different site compared to pain and active treatment. This might have had important influences on sham therapy reliability and consequently to study results.

Lack of blinding seemed not to be related to dropouts rate, although both these data were reported only in two trials. Bialosky J and Hoiriis K showed high percentages of correct treatment allocation detection by participants but dropout rate between sham and MT group did not differ. (25, 29) These results seem to be in conflict, nevertheless, participants could have wanted to remain in the trial for several other reasons such as the setting or the attraction of being evaluated by an expert clinician free. This possibility is reinforced by the fact that a similar dropout rate was reached in the comparison sham versus no treatment. These data suggest that dropout rate might not be a dependable outcome for assessing reliability of ST. Another factor that seemed to put blinding validity at risk was the use of a single technique. Single techniques were generally more difficult to mask, negatively affecting the validity of blinding of participants. The majority of trials judged as at high or unclear risk of performance bias used a single technique evaluating its effects on pain soon after its performance, or its effect after different sessions.

When compared to no intervention, ST showed no effect. Only one study of the four included in the meta-analysis showed a statistically significant effect in favour of ST. This study was the only one judged at low risk of performance bias because researches tried to mask ST performing techniques very similar to MT and excluding participants that already received the treatment tested. (26) This trial was the one that showed a marked effect on pain (MD -21.7, 95% CI -33.5 to -9.9, 42 participants). (**Appendix 5**) Other studies included in this comparison, judged at high risk of performance bias, showed no effect of ST. These results suggest that lack of blinding could have had an impact on this comparison.

This review included generally small trials. Only 14 of 24 studies performed a sample size calculation but just two of these considered MCID in this computation. The MCID is the measure of smallest change of PROs that patients perceive as important, beneficial or harmful. MCID is useful for clinicians to interpret the findings of trials and apply them in clinical practice

1  
2  
3 and to their decision-making. (48) An adequate sample size calculation, using MCID especially in  
4 trials with PROs, is fundamental to assess the number of participants needed to detect clinically  
5 relevant treatment effects. Oversized trials, which expose too many people to unnecessary  
6 therapies, or underpowered trials, which may not achieve significant results, should be avoided.  
7 (49-51)  
8  
9

### 10 **Comparison with other studies**

11  
12  
13 Similar findings were found in other reviews conducted on LBP. Ruddock JK 2016 included  
14 studies where SM was compared to what authors called “an effective ST”, namely a credible  
15 sham manipulation that physically mimics the SM. Pooled data from four trials showed a very  
16 small and not clinically meaningful effect in favour of MT. (52)  
17 Rubinstein SM 2019 compared SM and mobilisation techniques to recommended, non-  
18 recommended therapies and to ST. Their findings showed that 5/47 studies included attempted  
19 to blind patients to the assigned intervention by providing a ST. Of these five trials, two were  
20 judged at unclear risk of participants blinding. The authors also questioned the need for  
21 additional studies on this argument, as during the update of their review they found recent  
22 small pragmatic studies with high risk of bias. We agree with Rubinstein SM *et al.* that recent  
23 studies included in this review did not show a higher quality of evidence. The development of  
24 RCT with similar characteristic will probably not add any proof of evidence on MT and ST  
25 effectiveness. (53)  
26  
27  
28  
29  
30

### 31 **Limitations**

32  
33  
34 This review aimed to compare different kinds of sham therapy with different kinds of MT and  
35 no intervention. The nature of this comparison needed an NMA, but this analysis could not be  
36 performed due to the small number of trials using hand contact ST. The decision to include only  
37 this kind of sham therapy was mainly due to the intention of analysing the effect of manual  
38 interaction between practitioner and patients, which is suspected of leading to an amplified  
39 placebo effect. (54) Additionally, the use of machine placebo trials in the same meta-analysis  
40 could have increased diversity within included trials due to the possible enhanced presence of  
41 biases such as performance and consequently detection ones.  
42  
43  
44

45 Although the population differed - some trials analysed cervical, others lumbar pain with  
46 different aetiologies and different symptoms duration - this factor did not affect the meta-  
47 analysis performed, as highlighted by the low heterogeneity found in the primary outcome.  
48 As already suggested by other authors, (1) placebo effect might be influenced by chronic pain,  
49 nevertheless, in this review, this analysis could not be performed due to the range of pain  
50 duration in trials included (from acute to chronic in the same trial).  
51  
52

53 Data concerning settings and operators were insufficient to evaluate the influence of these two  
54 factors on sham therapy response. Experience of practitioners was considered in data  
55 extraction but insufficient information was provided by authors to draw any hypothesis.  
56 Another limit was in not considering non-objective outcomes as primary outcome for meta-  
57 analysis. Nevertheless, most of the trials included did not evaluate an objective outcome and  
58 the few studies which analysed this type of outcome used different kinds of scales not easily  
59 comparable in a meta-analysis.  
60

1  
2  
3 Pair-wise comparison on pain outcome between sham and MT showed slightly higher effects of  
4 MT in trials where blinding was ensured. A linear regression analysis was planned to assess the  
5 impact of blinding on meta-analysis results. Due to the small number of trials, this analysis  
6 could not be performed. This trend follows what has been already suggested by other studies.  
7 (55) However trials with bigger sample size are needed to assess a real correlation between  
8 these two factors.  
9  
10

11 Another limit of this study is that risk of bias was assessed by one author (CL) and agreed by  
12 another (MG). This aspect could have been improved if both authors had worked  
13 independently on bias risk assessment and then discussed any discrepancy.  
14  
15

### 16 **Implications for practitioners**

17  
18  
19 In some clinical contexts, MT could be difficult to apply; for example, some patients may  
20 present hyperalgesia to tactile stimuli. Defrin R 2014 suggested that tactile allodynia might be  
21 present in 60% of patients with chronic LBP associated with radicular pain. (56)

22  
23 In this kind of patient the use of MT could be excessively painful, and any MT that triggers pain  
24 should be avoided. (57) ST - and therefore a possible placebo effect - could represent a valid  
25 alternative to MT in the multi-disciplinary approach to back pain, promoting pain relief without  
26 increasing the possibility of AE occurrence.  
27

28  
29 This thought is strengthened by our findings: ST was found to be equally safe to MT without  
30 increasing the risk of AE occurrence when compared to no intervention. Furthermore, when  
31 blinding was guaranteed, ST showed a statistically significant effect on pain reduction in chronic  
32 LBP patients compared to no treatment.  
33

34 ST could be seen as an “affective touch”, which it is suggested creates a pleasant therapeutic  
35 experience promoting affiliative behaviours and pain improvement. (58, 59)

36 Nevertheless, due to the low quality of the studies included in this review, further studies are  
37 needed to verify the possible role of ST among patients where MT is not well tolerated.  
38  
39  
40

### 41 **Implications for research**

42  
43  
44 In MT trials a true placebo is impossible to achieve so trials should implement strategies to  
45 guarantee patient and assessor blinding, for example avoiding the inclusion of participants who  
46 already received the active treatment and avoiding single technique performance which are  
47 more difficult to mask. Plans to avoid performance bias, such as giving similar treatment with  
48 similar localization have to be implemented.  
49

50 Moreover, the evaluation of the success of blinding should be considered as, at least, secondary  
51 outcome.  
52

53 Researchers should pay particular attention to sample size calculation using the MCID. This  
54 difference is fundamental both for research and patients. MCID indicates patients’ values and  
55 preferences and can help clinicians improve interpretation and promote the understanding of  
56 the importance of intervention effects in RCTs.  
57  
58

59 NICE guidelines for LBP suggest the use of MT only as “ a part of a treatment package including  
60 exercise, with or without psychological therapy”. (60) Therefore, the development of future CT

1  
2  
3 should imitate the real multi-disciplinary clinical context to assess the external validity of future  
4 findings.

5 Future researches should also evaluate the real effects of ST comparing it both with active  
6 treatment and with the no intervention groups. Only with this kind of design could the real  
7 placebo effect in MT be defined.  
8  
9

## 10 11 12 13 14 15 16 17 18 19 20 21 22 23 24 25 26 27 28 29 30 31 32 33 34 35 36 37 38 39 40 41 42 43 44 45 46 47 48 49 50 51 52 53 54 55 56 57 58 59 60

### Conclusions

This review aimed to evaluate ST effect in MT trials. MT showed higher efficacy than ST, but when blinding was ensured the effects of ST and MT were larger. Nevertheless, these findings were not clinically meaningful and the very low quality of the included studies might undermine the reliability of this reviews' results.

The use of ST and its application in MT study is very controversial. Future trials should focus on developing a reliable kind of sham procedure similar to the active treatment, to ensure participants blinding and to guarantee a proper sample size for the detection of reliable, clinically relevant, treatment effects.

#### Contributors:

*CL* conceived the idea of this review and designed the study with the contribution of *MG* who also helped in literature search and in the interpretation of study findings. *CL* and *MG* revised studies, performed data extraction and analysis and wrote this review.

*AA* and *AM* provided clinical and technical support, reviewed the manuscript and helped in publication and with the clinical interpretation of study findings.

*CL* is the guarantor of this paper. The corresponding author attests that all listed authors meet authorship criteria and that no others meeting the criteria have been omitted.

Patients and public were not involved in this project.

**Acknowledgements:** We thank Valentina Rotondi, statistician, for all her support during the statistical analysis and data interpretation. We thank Roberta Maoret, librarian, for helping us in the search strategy implementation.

**Ethical approval:** due to the chosen study design, the ethical approval was not required.

**Data sharing:** Details of the characteristics of the included studies and data extracted are available from the corresponding author at [carolina.lavazza@docenti.aimoedu.it](mailto:carolina.lavazza@docenti.aimoedu.it). Extra data can be accessed via the Dryad data repository at <http://datadryad.org/> with the doi: 10.5061/dryad.v9s4mw6tb

## References

1. Meissner K, Fässler M, Rücker G, Kleijnen J, Hróbjartsson A, Schneider A, et al. Differential effectiveness of placebo treatments: a systematic review of migraine prophylaxis. *JAMA internal medicine*. 2013;173(21):1941-51.
2. Sciences CfIOoM. International Ethical Guidelines for Health-Related Research Involving Humans, Fourth Edition. Geneva2016.
3. REGULATION (EU) No 536/2014 OF THE EUROPEAN PARLIAMENT AND OF THE COUNCIL of 16 April 2014 on clinical trials on medicinal products for human use, and repealing Directive 2001/20/EC, (2014).
4. Korthals-de Bos IB, Müllner M, Hoving JL, van Tulder MW, Rutten-van Mölken MP, Adèr HJ, et al. Cost effectiveness of physiotherapy, manual therapy, and general practitioner care for neck pain: economic evaluation alongside a randomised controlled trial. *BMJ*. 2003;326(7395):1-6.
5. Kawchuk G N, Haugen R, Fritz J. A True Blind for Subjects Who Receive Spinal Manipulation Therapy. *Archives of Physical Medicine and Rehabilitation*. 2009;90(2):366-8.
6. Mancini F, Beaumont AL, Hu L, Haggard P, Iannetti GDD. Touch inhibits subcortical and cortical nociceptive responses. *Pain*. 2015;156(10).
7. So PS, Jiang JY, Qin Y. Touch therapies for pain relief in adults. *Cochrane Database of Systematic Reviews*. 2008.
8. Cai L., He L. Placebo effects and the molecular biological components involved. *General psychiatry*. 2019;32(5):1-10.
9. Kaptchuk T. J., Miller F. G. Placebo effects in medicine. *N Engl J Med*. 2015;373(1):8-9.
10. Finniss DG, Kaptchuk TJ, Miller F, Benedetti F. Placebo effects: biological, clinical and ethical advances. *Lancet*. 2010;375:686.
11. Price DD, Finniss DG, Benedetti F. A comprehensive review of the placebo effect: recent advances and current thought. *Annu Rev Psychol*. 2008;59:565-90.
12. Miller C. B., Espie C. A., Epstein D. R., et al. The evidence base of sleep restriction therapy for treating insomnia disorder. *Sleep medicine reviews*. 2014;18(15):415-24.
13. Colloca L, Miller FG. The nocebo effect and its relevance for clinical practice. *Psychosomatic medicine*. 2011;73:598-603.
14. Koes BW. How to evaluate manual therapy: value and pitfalls of randomized clinical trials. *Manual therapy*. 2004:183-4.
15. Chaibi A, Benth JŠ, Russell MB. Validation of placebo in a manual therapy randomized controlled trial. *Scientific reports*. 2015;5(1):1-8.
16. Hróbjartsson A, Gøtzsche PC. Placebo interventions for all clinical conditions. *Cochrane database of systematic reviews*. 2004;2.
17. Kaptchuk TJ, Stason WB, Davis RB, Legedza AR, Schnyer RN, Kerr CE, et al. Sham device v inert pill: randomised controlled trial of two placebo treatments. *BMJ*. 2006;332:391-7.
18. Moher D, Shamseer L, Clarke M, Ghersi D, Liberati A, Petticrew M et al. Preferred reporting items for systematic review and meta-analysis protocols (PRISMA-P) 2015 statement. *Systematic Reviews*. 2015;4(1):1.
19. Higgins JPT, Green S. *Cochrane Handbook for Systematic Reviews of Interventions* Version 5.1.0 [updated March 2011]. . <https://handbook-5->



1  
2  
3  
4  
5  
6  
7  
8  
9  
10  
11  
12  
13  
14  
15  
16  
17  
18  
19  
20  
21  
22  
23  
24  
25  
26  
27  
28  
29  
30  
31  
32  
33  
34  
35  
36  
37  
38  
39  
40  
41  
42  
43  
44  
45  
46  
47  
48  
49  
50  
51  
52  
53  
54  
55  
56  
57  
58  
59  
60

- [1.cochrane.org/index.htm#chapter\\_8/8\\_assessing\\_risk\\_of\\_bias\\_in\\_included\\_studies.htm](http://1.cochrane.org/index.htm#chapter_8/8_assessing_risk_of_bias_in_included_studies.htm): The Cochrane Collaboration; 2011.
20. Pool JJ, Ostelo RW, Hoving JL, Bouter LM, De Vet HC. Minimal clinically important change of the Neck Disability Index and the Numerical Rating Scale for patients with neck pain. . Spine. 2007;32(26):3047-51.
21. Ostelo RW, Deyo RA, Stratford P, Waddell G, Croft P, Von Korff M, et al. Interpreting change scores for pain and functional status in low back pain: towards international consensus regarding minimal important change. . Spine. 2008;33(1):90-4.
22. Farrar JT, Young Jr JP, LaMoreaux L, Werth JL, Poole RM. Clinical importance of changes in chronic pain intensity measured on an 11-point numerical pain rating scale. . Pain. 2001;94(2):149-58.
23. Higgins JPT, Green S. Cochrane Handbook for Systematic Reviews of Interventions Version 5.1.0 [updated March 2011].9.5.2 Identifying and measuring heterogeneity. [https://handbook-5-1.cochrane.org/chapter\\_9/9\\_5\\_2\\_identifying\\_and\\_measuring\\_heterogeneity.htm](https://handbook-5-1.cochrane.org/chapter_9/9_5_2_identifying_and_measuring_heterogeneity.htm): The Cochrane Collaboration; 2011.
24. Licciardone JC, Minotti DE, Gatchel RJ, Kearns CM, Singh K. Osteopathic manual treatment and ultrasound therapy for chronic low back pain: a randomized controlled trial. The Annals of Family Medicine. 2013;11(2):122-9.
25. Bialosky JE, George SZ, Horn ME, Price DD, Staud R, Robinson ME. Spinal manipulative therapy-specific changes in pain sensitivity in individuals with low back pain (NCT01168999). . The journal of pain. 2014;15(2):136-48.
26. Eardley S, Brien S, Little P, Prescott P, Lewith G. Professional kinesiology practice for chronic low back pain: single-blind, randomised controlled pilot study. . Complementary Medicine Research. 2013;20(3):180-8.
27. Erdogmus CB, Resch KL, Sabitzer R, Müller H, Nuhr M, Schögl A, et al. Physiotherapy-based rehabilitation following disc herniation operation: results of a randomized clinical trial. . Spine. 2007;32(19):2041-9.
28. Hansen FR, Bendix T, Skov P, Jensen CV, Kristensen JH, Krohn L, et al. Intensive, dynamic back-muscle exercises, conventional physiotherapy, or placebo-control treatment of low-back pain. A randomized, observer-blind trial. Spine. 1993;18(1):98-108.
29. Hoiriis KT, Pflieger B, McDuffie FC, Cotsonis G, Elsangak O, Hinson R, et al. A randomized clinical trial comparing chiropractic adjustments to muscle relaxants for subacute low back pain. Journal of Manipulative and Physiological Therapeutics. 2004;27(6):388-98.
30. Krekoukias G, Gelalis ID, Xenakis T, Gioftsos G, Dimitriadis Z, Sakellari V. Spinal mobilization vs conventional physiotherapy in the management of chronic low back pain due to spinal disk degeneration: a randomized controlled trial. . Journal of Manual & Manipulative Therapy. 2017;25(2):66-73.
31. Licciardone JC, Stoll ST, Fulda KG, Russo DP, Siu J, Winn W, et al. Osteopathic manipulative treatment for chronic low back pain: A randomized controlled trial. Spine. 2003;28(13):1355-62.
32. Senna MK, Machaly SA. Does maintained spinal manipulation therapy for chronic nonspecific low back pain result in better long-term outcome? Spine. 2011;36(18).
33. Lascurain-Aguirrebeña I, Newham DJ, Casado-Zumeta X, Lertxundi A, Critchley DJ. Immediate effects of cervical mobilisations on global perceived effect, movement associated pain and neck kinematics in patients with non-specific neck pain. A double blind placebo randomised controlled trial. Musculoskeletal Science and Practice. 2018;38:83-90.

- 1  
2  
3 34. Selkow NM, Grindstaff TL, Cross KM, Pugh K, Hertel J, Saliba S. Short-term effect of  
4 muscle energy technique on pain in individuals with non-specific lumbopelvic pain: a pilot  
5 study. . *Journal of manual & manipulative therapy*. 2009;19(1):14E-8E.  
6  
7 35. Antolinos-Campillo PJ, Oliva-Pascual-Vaca A, Rodríguez-Blanco C, Heredia-Rizo AM, Espí-  
8 López GV, Ricard F. Short-term changes in median nerve neural tension after a suboccipital  
9 muscle inhibition technique in subjects with cervical whiplash: a randomised controlled trial.  
10 *Physiotherapy*. 2014;100(3):249-55.  
11  
12 36. Haller H, Lauche R, Cramer H, Rampp T, Saha FJ, Ostermann T, et al. Craniosacral therapy  
13 for the treatment of chronic neck pain: a randomized sham-controlled trial. *The Clinical journal of*  
14 *pain*. 2016;32(5):441- 9.  
15  
16 37. Klein R, Bareis A, Schneider A, Linde K. Strain-counterstrain to treat restrictions of the  
17 mobility of the cervical spine in patients with neck pain—A sham-controlled randomized trial.  
18 *Complementary Therapies in Medicine*. 2013;21(1):1–7.  
19  
20 38. Younes M, Nowakowski K, Didier-Laurent B, Gombert M, Cottin F. Effect of spinal  
21 manipulative treatment on cardiovascular autonomic control in patients with acute low back  
22 pain. *Chiropractic and Manual Therapies*. 2017;25(1).  
23  
24 39. Quinn F, Hughes CM, Baxter GD. Reflexology in the management of low back pain: A  
25 pilot randomised controlled trial. *Complementary Therapies in Medicine*. 2008;16(1):3-8.  
26  
27 40. Sillevs R, Cleland J, Hellman M, Beekhuizen K. Immediate effects of a thoracic spine  
28 thrust manipulation on the autonomic nervous system: a randomized clinical trial. . *Journal of*  
29 *Manual & Manipulative Therapy* . 2010;18.  
30  
31 41. Cleland JA, Childs MJD, McRae M, Palmer JA, Stowell T. Immediate effects of thoracic  
32 manipulation in patients with neck pain: a randomized clinical trial. . *Manual therapy*.  
33 2005;10(2):127-35.  
34  
35 42. Pires PF, Packer AC, Dibai-Filho AV, Rodrigues-Bigaton D. Immediate and short-term  
36 effects of upper thoracic manipulation on myoelectric activity of sternocleidomastoid muscles  
37 in young women with chronic neck pain: A randomized blind clinical trial. . *Journal of*  
38 *manipulative and physiological therapeutics*. 2015;38(8).  
39  
40 43. Silva AC, Biasotto-Gonzalez DA, Oliveira FHM, Andrade AO, Gomes CADFP, Lanza FDC, et  
41 al. Effect of osteopathic visceral manipulation on pain, cervical range of motion, and upper  
42 trapezius muscle activity in patients with chronic nonspecific neck pain and functional  
43 dyspepsia: a randomized, double-blind, placebo-controlled pilot study. . *Evidence-Based*  
44 *Complementary and Alternative Medicine*. 2018;2018:1-9.  
45  
46 44. Vieira-Pellenz F, Oliva-Pascual-Vaca Á, Rodríguez-Blanco C, Heredia-Rizo AM, Ricard F,  
47 Almazán-Campos G. Short-term effect of spinal manipulation on pain perception, spinal  
48 mobility, and full height recovery in male subjects with degenerative disk disease: a randomized  
49 controlled trial. . *Archives of physical medicine and rehabilitation*. 2014;95(9):1613-9.  
50  
51 45. Kogure A, Kotani K, Katada S, Takagi H, Kamikozuru M, Isaji T, et al. A randomized,  
52 single-blind, placebo-controlled study on the efficacy of the arthrokinematic approach-hakata  
53 method in patients with chronic nonspecific low back pain. *PloS one*. 2015;10(12):1-16.  
54  
55 46. Hall T, Hardt S, Schafer A, Wallin L. Mulligan bent leg raise technique-a preliminary  
56 randomized trial of immediate effects after a single intervention. *Manual Therapy*.  
57 2006;11(2):130-5.  
58  
59 47. Dunning J, Mourad F, Barbero M, Leoni D, Cescon C, Butts R. Bilateral and multiple  
60 cavitation sounds during upper cervical thrust manipulation. . *BMC musculoskeletal disorders*.  
2013;14(1):24.  
48. BC J, S E, A C-L, Furukawa TA, Patrick DL, Crawford MW et al. Minimally important  
difference estimates and methods: a protocol. *BMJ Open*. 2015;5:1-5.

1  
2  
3  
4  
5  
6  
7  
8  
9  
10  
11  
12  
13  
14  
15  
16  
17  
18  
19  
20  
21  
22  
23  
24  
25  
26  
27  
28  
29  
30  
31  
32  
33  
34  
35  
36  
37  
38  
39  
40  
41  
42  
43  
44  
45  
46  
47  
48  
49  
50  
51  
52  
53  
54  
55  
56  
57  
58  
59  
60

49. Charles P, Giraudeau B, Dechartres A, Baron G, Ravaud P. Reporting of sample size calculation in randomised controlled trials. *BMJ*. 2009;388.
50. Moher D, Hopewell S, Schulz KF, Montori V, Gøtzsche PC, Devereaux PJ et al. CONSORT 2010 explanation and elaboration: updated guidelines for reporting parallel group randomised trials. *International journal of surgery*. 2012;10(1):28-55.
51. Turner RM, Bird SM, Higgins JP. The impact of study size on meta-analyses: examination of underpowered studies in Cochrane reviews. *PloS one*. 2013;8(3).
52. Ruddock JK, Sallis H, Ness A, Perry RE. Spinal manipulation vs sham manipulation for nonspecific low back pain: a systematic review and meta-analysis. *Journal of chiropractic medicine*. 2016;15(3):165-83.
53. Rubinstein SM, De Zoete A, Van Middelkoop M, Assendelft WJ, De Boer MR, Van Tulder MW. Benefits and harms of spinal manipulative therapy for the treatment of chronic low back pain: systematic review and meta-analysis of randomised controlled trials. *BMJ*. 2019;364.
54. Monroe CM. The effects of therapeutic touch on pain. *Journal of Holistic Nursing*. 2009;27(2):85-92.
55. Rubinstein SM, van Eekelen R, Oosterhuis T, de Boer MR, Ostelo RW, van Tulder MW. The risk of bias and sample size of trials of spinal manipulative therapy for low back and neck pain: analysis and recommendations. *Journal of manipulative and physiological therapeutics*. 2014;37(8):523-41.
56. Defrin R, Devor M, Brill S. Tactile allodynia in patients with lumbar radicular pain (sciatica). *PAIN®*. 2014;155(12):2551-9.
57. Nijs J, Van Houdenhove B. From acute musculoskeletal pain to chronic widespread pain and fibromyalgia: application of pain neurophysiology in manual therapy practice. *Manual therapy*. 2009;14(1):3-12.
58. Geri T, Viceconti A, Minacci M, Testa M, Rossetini G. 2019. *Musculoskeletal Science and Practice*. Manual therapy: exploiting the role of human touch. ;44.
59. Walker SC, Trotter PD, Swaney WT, Marshall A, Mcglone FP. C-tactile afferents: Cutaneous mediators of oxytocin release during affiliative tactile interactions?. *Neuropeptides*. 2017;64:27-38.
60. (NICE) NifHaCE. Low back pain and sciatica in over 16s: assessment and management <https://www.nice.org.uk/guidance/ng59/chapter/Recommendations11> December 2020 [





Figure 1: PRISMA flow diagram

48x56mm (298 x 300 DPI)

1  
2  
3  
4  
5  
6  
7  
8  
9  
10  
11  
12  
13  
14  
15  
16  
17  
18  
19  
20  
21  
22  
23  
24  
25  
26  
27  
28  
29  
30  
31  
32  
33  
34  
35  
36  
37  
38  
39  
40  
41  
42  
43  
44  
45  
46  
47  
48  
49  
50  
51  
52  
53  
54  
55  
56  
57  
58  
59  
60

|                            | Random sequence generation (selection bias) | Allocation concealment (selection bias) | Blinding of participants and personnel (performance bias) | Blinding of outcome assessment (detection bias) | Incomplete outcome data (attrition bias) | Selective reporting (reporting bias) | Other bias |
|----------------------------|---------------------------------------------|-----------------------------------------|-----------------------------------------------------------|-------------------------------------------------|------------------------------------------|--------------------------------------|------------|
| Antolinos-Campillo PJ 2014 | ●                                           | ?                                       | ●                                                         | ●                                               | ●                                        | ?                                    | ●          |
| Bialosky J 2014            | ●                                           | ●                                       | ●                                                         | ●                                               | ●                                        | ●                                    | ●          |
| Cleland JA 2005            | ●                                           | ?                                       | ?                                                         | ?                                               | ●                                        | ?                                    | ?          |
| Eardley S 2013             | ?                                           | ?                                       | ●                                                         | ?                                               | ●                                        | ●                                    | ●          |
| Erdogmus C 2007            | ?                                           | ●                                       | ●                                                         | ●                                               | ●                                        | ●                                    | ?          |
| Haller H 2016              | ●                                           | ●                                       | ●                                                         | ●                                               | ●                                        | ●                                    | ●          |
| Hall T 2004                | ●                                           | ●                                       | ●                                                         | ●                                               | ●                                        | ?                                    | ●          |
| Hansen F 1993              | ●                                           | ?                                       | ?                                                         | ●                                               | ●                                        | ?                                    | ●          |
| Hidalgo B 2015             | ?                                           | ●                                       | ●                                                         | ●                                               | ●                                        | ●                                    | ?          |
| Hoiris K 2004              | ●                                           | ?                                       | ?                                                         | ●                                               | ●                                        | ?                                    | ●          |
| Klein R 2013               | ●                                           | ●                                       | ●                                                         | ●                                               | ●                                        | ?                                    | ●          |
| Kogure A 2015              | ●                                           | ●                                       | ●                                                         | ●                                               | ●                                        | ?                                    | ●          |
| Krekoukias G 2017          | ●                                           | ?                                       | ?                                                         | ?                                               | ●                                        | ●                                    | ●          |
| Lascuain-Agulrebena I 2018 | ?                                           | ●                                       | ?                                                         | ●                                               | ●                                        | ●                                    | ●          |
| Licciardone J. 2013        | ●                                           | ●                                       | ●                                                         | ?                                               | ●                                        | ●                                    | ●          |
| Licciardone J 2003         | ●                                           | ?                                       | ●                                                         | ?                                               | ●                                        | ●                                    | ●          |
| Pires FP 2015              | ?                                           | ?                                       | ●                                                         | ?                                               | ●                                        | ●                                    | ●          |
| Quinn F 2008               | ●                                           | ●                                       | ●                                                         | ●                                               | ?                                        | ?                                    | ?          |
| Selkow NM 2009             | ●                                           | ●                                       | ?                                                         | ?                                               | ●                                        | ?                                    | ●          |
| Senna MK 2011              | ●                                           | ●                                       | ?                                                         | ?                                               | ●                                        | ●                                    | ●          |
| Sillevis R 2010            | ●                                           | ●                                       | ?                                                         | ?                                               | ●                                        | ?                                    | ?          |
| Silva A 2018               | ●                                           | ●                                       | ●                                                         | ?                                               | ?                                        | ?                                    | ●          |
| Vieira-Pellez F 2014       | ●                                           | ●                                       | ●                                                         | ?                                               | ●                                        | ?                                    | ?          |
| Younes M 2017              | ?                                           | ?                                       | ?                                                         | ?                                               | ●                                        | ?                                    | ?          |

Figure 2: Risk of bias summary. Review authors' judgements about each risk of bias item for each included study.

34x93mm (298 x 299 DPI)



Figure 3: Forest plot of comparison ST versus MT in back pain outcome at short-term.

84x50mm (300 x 298 DPI)



Figure 4: Forest plot of comparison ST versus MT in number of dropouts outcome

72x38mm (299 x 299 DPI)

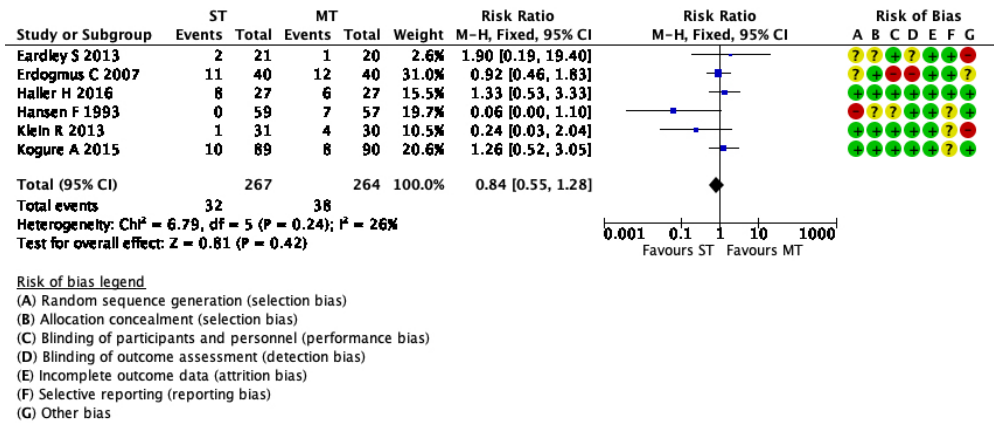

Figure 5: Forest plot of comparison ST versus MT in number of adverse events outcome at short-term

72x31mm (299 x 298 DPI)

1  
2  
3  
4  
5  
6  
7  
8  
9  
10  
11  
12  
13  
14  
15  
16  
17  
18  
19  
20  
21  
22  
23  
24  
25  
26  
27  
28  
29  
30  
31  
32  
33  
34  
35  
36  
37  
38  
39  
40  
41  
42  
43  
44  
45  
46  
47  
48  
49  
50  
51  
52  
53  
54  
55  
56  
57  
58  
59  
60

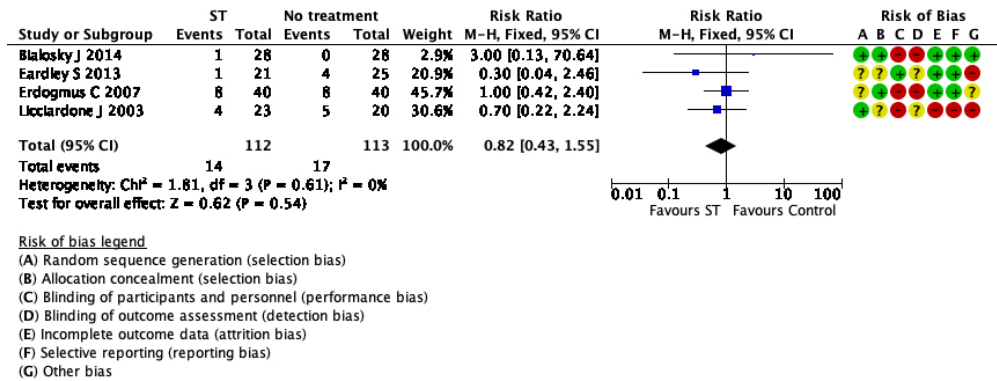

Figure 6: Forest plot of comparison ST versus no treatment in number of dropouts outcome

73x28mm (299 x 299 DPI)

## Appendix 1: search strategy

### Medline

1. Mesh descriptor: [Back Pain] explode all trees
2. dorsalgia/
3. backache
- 4.(neck OR cervical) adj1 pain → Mesh
5. exp Brachial Plexus Neuropathies
6. exp Lumbar Plexus Neuropathies
7. Neck Pain/
8. neckache
9. Torticollis/
10. whiplash.mp
11. cervicodynia.mp
12. spondylitis/ OR spondylosis/ OR spondylolysis/ OR spondylolysthesis
- 13.(lumbar OR dorsal OR neck OR cervical OR sciatica) adj2 (pain OR ache)
14. (lumbar OR dorsal OR neck OR cervical) adj2 (discitis OR disc adj 1 herniation OR disc adj1 herniation)
15. 1 OR 2 OR 3 OR 4 OR 5 OR 6 OR 7 OR 8 OR 9 OR 10 OR 11 OR 12 OR 13 OR 14
16. (PLACEBO\* or MOCK\* or SHAM\* or FAKE\* or VEHICLE\* or DUMM\* or ATTENTION\* CONTROL\* or PSEUDO\* TREAT\* or UN?SPECIFIC\* or NON?SPECIFIC\* OR simulat\$ treatment OR inert agent)
17. Chiropractic/
18. Manipulation, Chiropractic/
19. chiropract\$.tw.
20. (manual adj2 therap\$).mp
21. spinal manipulation.mp. or Manipulation, Spinal/
22. osteopath\$.tw.
23. Osteopathic Medicine/
24. Physical Therapy Modalities/ or "Physical Therapy (Specialty)"/ or physical therap\$.tw. or physiotherap\$.tw.
25. myotherapy.mp
26. shiatsu.mp
- 27.exp Therapeutic Touch/
28. exp Massage/
29. (neuromuscular adj therapy).mp
30. 17 OR 18 OR 19 OR 20 OR OR 21 OR 22 OR 23 OR 24 OR 25 OR 26 OR 27 OR 28 OR 29
31. pain
32. range of motion
33. ROM
34. 31 OR 32 OR 33
35. Clinical Trial/
36. Randomized Controlled Trial/
37. controlled clinical trial/
38. exp RANDOMIZATION/
39. PLACEBO/
40. (random\$ adj2 allocat\$).tw.
41. single blind\$.tw.

1  
2  
3  
4  
5  
6  
7  
8  
9  
10  
11  
12  
13  
14  
15  
16  
17  
18  
19  
20  
21  
22  
23  
24  
25  
26  
27  
28  
29  
30  
31  
32  
33  
34  
35  
36  
37  
38  
39  
40  
41  
42  
43  
44  
45  
46  
47  
48  
49  
50  
51  
52  
53  
54  
55  
56  
57  
58  
59  
60

- 42. double blind\$.tw.
- 43. placebo\$.tw.
- 44. 35 OR 36 OR 37 OR 38 OR 39 OR 40 OR 41 OR 42 OR 43
- 45. animals/
- 46. humans/
- 47. 46 NOT 45
- 48. 15 AND 16 AND 30 AND 44 AND 47

For peer review only



**Appendix 2:** data extraction form

|                      |                                                                                                                                                                                                                                                                                                                                                                                                                                                                                                                                                                           |
|----------------------|---------------------------------------------------------------------------------------------------------------------------------------------------------------------------------------------------------------------------------------------------------------------------------------------------------------------------------------------------------------------------------------------------------------------------------------------------------------------------------------------------------------------------------------------------------------------------|
| <b>Methods</b>       | <b>Trial Design</b><br><br><b>Settings</b>                                                                                                                                                                                                                                                                                                                                                                                                                                                                                                                                |
| <b>Participants</b>  | <b>Total number of participants:</b><br><br><b>Age:</b><br><br><b>Gender(M/F):</b><br><br><b>BMI:</b><br><br><b>Activity:</b><br><br><b>Duration of the symptoms:</b><br><br><b>Location of pain</b> (one-sided, double-sided, central, cervical, dorsal or lumbar):<br><br><b>Cause of pain:</b> (e.g. disc herniation, contractures, aspecific pain)<br><br><b>Previous experience of the treatment provided:</b> Y/N/ N/A<br><br><b>Inclusion and exclusion Criteria:</b><br><br><b>VAS:</b><br><br><b>Practitioner characteristics:</b> (years of experience, gender) |
| <b>Interventions</b> | <b>Placebo:</b><br><br><b>Comparator:</b>                                                                                                                                                                                                                                                                                                                                                                                                                                                                                                                                 |
| <b>Outcomes</b>      | <b>Outcomes used in the meta-analysis:</b><br><br><b>Length of follow-up:</b>                                                                                                                                                                                                                                                                                                                                                                                                                                                                                             |
| <b>Notes</b>         | <b>Difference between Placebo and active treatment:</b><br><br><b>Placebo check for reliability:</b><br><br><b>Adverse event:</b>                                                                                                                                                                                                                                                                                                                                                                                                                                         |

1  
2  
3  
4  
5  
6  
7  
8  
9  
10  
11  
12  
13  
14  
15  
16  
17  
18  
19  
20  
21  
22  
23  
24  
25  
26  
27  
28  
29  
30  
31  
32  
33  
34  
35  
36  
37  
38  
39  
40  
41  
42  
43  
44  
45  
46  
47  
48  
49  
50  
51  
52  
53  
54  
55  
56  
57  
58  
59  
60

|  |                                                         |
|--|---------------------------------------------------------|
|  | <b>Lost to follow-up:</b><br><br><b>Funding source:</b> |
|--|---------------------------------------------------------|

For peer review only

**Appendix 3:** funnel plot of pain outcome with the inclusion (A) and with the exclusion (B) of two studies of Erdogmus C and Krekoukias G.

(A)



(B)



**Appendix 4:** forest plot of comparison pain outcome sham treatment vs manual therapies with the inclusion of two trials (Erdogmus C and Krekoukias G) at short, medium and long-term.

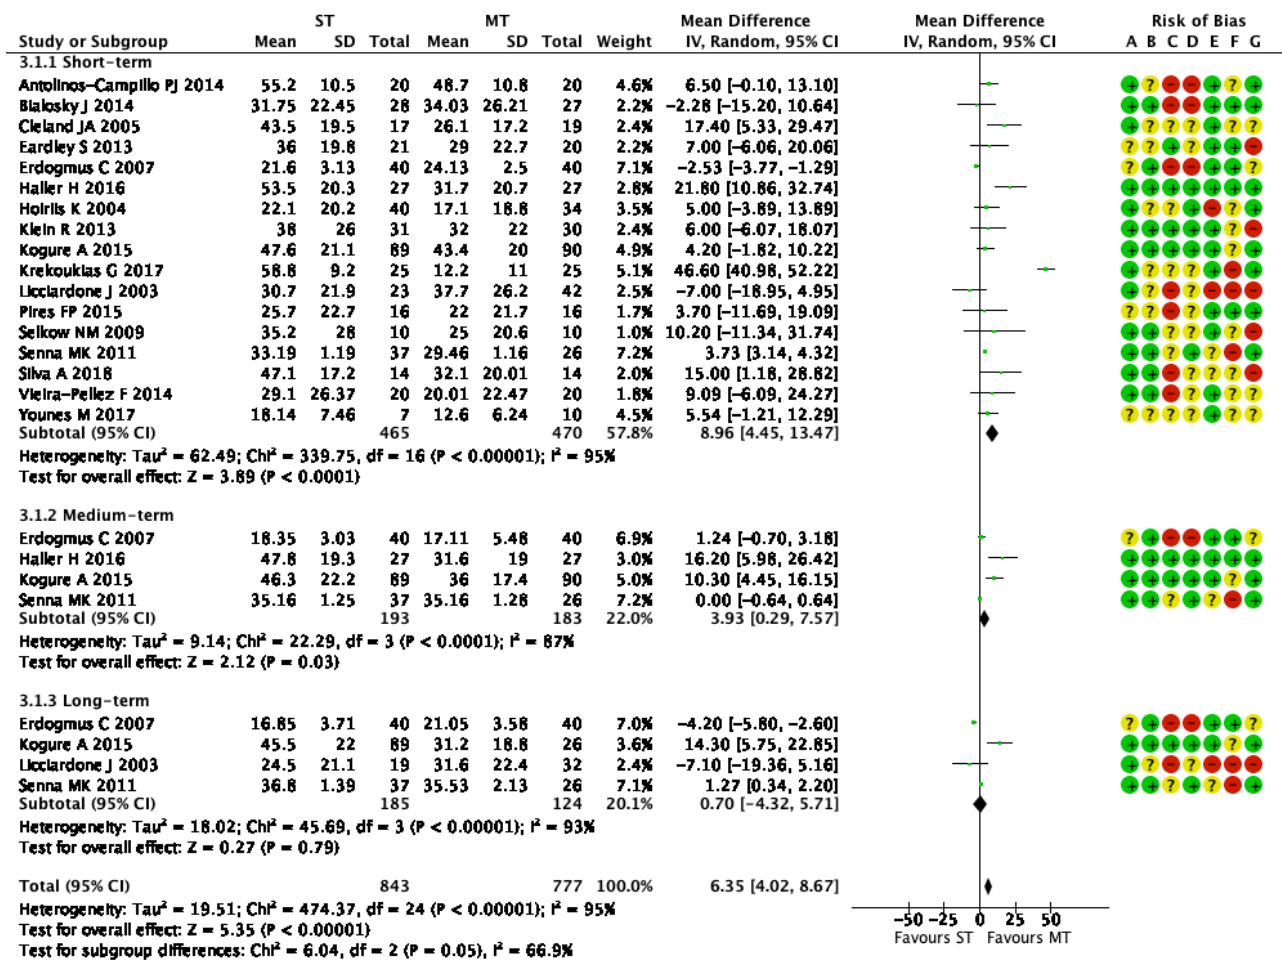**Risk of bias legend**

- (A) Random sequence generation (selection bias)
- (B) Allocation concealment (selection bias)
- (C) Blinding of participants and personnel (performance bias)
- (D) Blinding of outcome assessment (detection bias)
- (E) Incomplete outcome data (attrition bias)
- (F) Selective reporting (reporting bias)
- (G) Other bias

## Appendix 4.1: Sensitivity analysis with the exclusion of Ergogmus C and Krekoukias G at short, medium and long-term

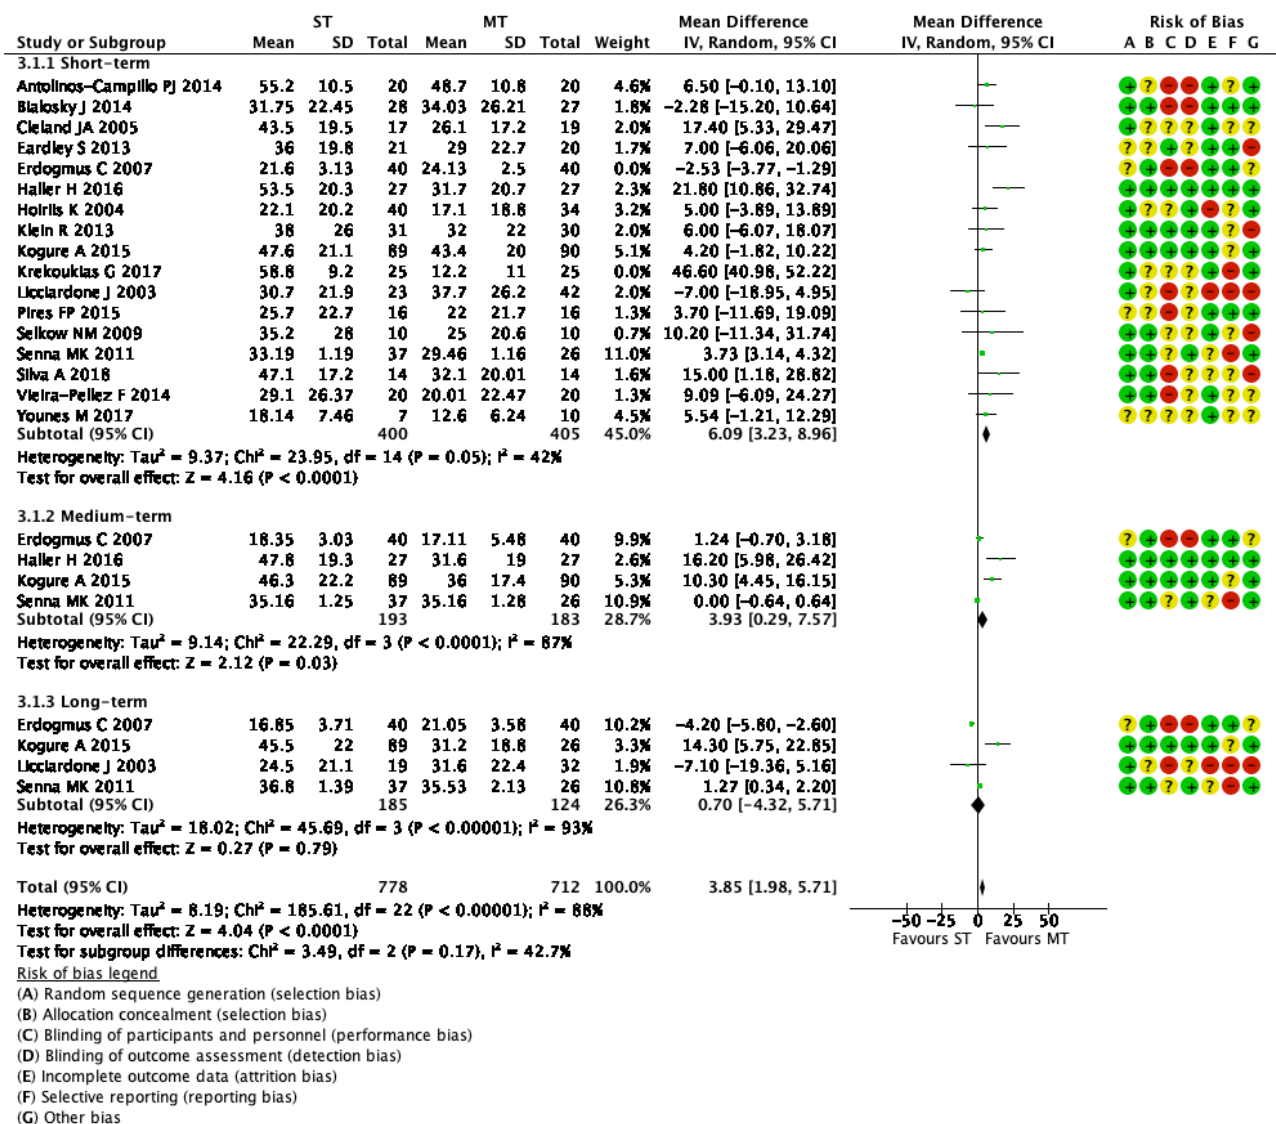

### Appendix 5: forest plot of comparison ST versus no treatment in back pain outcome at short-term with exclusion of Erdogmus C 2007 trial

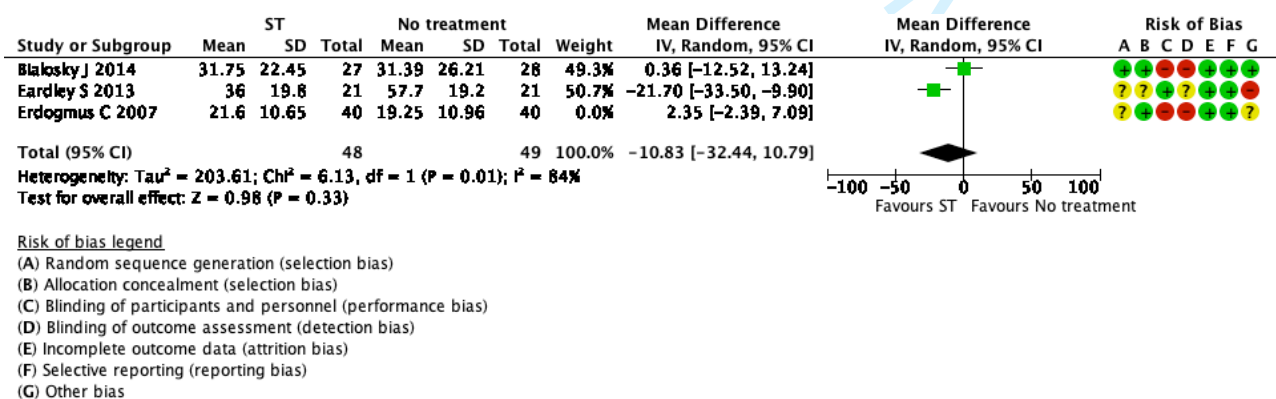



# PRISMA 2009 Checklist

| Section/topic                      | #  | Checklist item                                                                                                                                                                                                                                                                                              | Reported on page # |
|------------------------------------|----|-------------------------------------------------------------------------------------------------------------------------------------------------------------------------------------------------------------------------------------------------------------------------------------------------------------|--------------------|
| <b>TITLE</b>                       |    |                                                                                                                                                                                                                                                                                                             |                    |
| Title                              | 1  | Identify the report as a systematic review, meta-analysis, or both.                                                                                                                                                                                                                                         | Page 1             |
| <b>ABSTRACT</b>                    |    |                                                                                                                                                                                                                                                                                                             |                    |
| Structured summary                 | 2  | Provide a structured summary including, as applicable: background; objectives; data sources; study eligibility criteria, participants, and interventions; study appraisal and synthesis methods; results; limitations; conclusions and implications of key findings; systematic review registration number. | Page 5             |
| <b>INTRODUCTION</b>                |    |                                                                                                                                                                                                                                                                                                             |                    |
| Rationale                          | 3  | Describe the rationale for the review in the context of what is already known.                                                                                                                                                                                                                              | Pages 9-10         |
| Objectives                         | 4  | Provide an explicit statement of questions being addressed with reference to participants, interventions, comparisons, outcomes, and study design (PICOS).                                                                                                                                                  | Page 10            |
| <b>METHODS</b>                     |    |                                                                                                                                                                                                                                                                                                             |                    |
| Protocol and registration          | 5  | Indicate if a review protocol exists, if and where it can be accessed (e.g., Web address), and, if available, provide registration information including registration number.                                                                                                                               | Pages 6 and 10     |
| Eligibility criteria               | 6  | Specify study characteristics (e.g., PICOS, length of follow-up) and report characteristics (e.g., years considered, language, publication status) used as criteria for eligibility, giving rationale.                                                                                                      | Pages 10-11        |
| Information sources                | 7  | Describe all information sources (e.g., databases with dates of coverage, contact with study authors to identify additional studies) in the search and date last searched.                                                                                                                                  | Page 11            |
| Search                             | 8  | Present full electronic search strategy for at least one database, including any limits used, such that it could be repeated.                                                                                                                                                                               | Appendix 1         |
| Study selection                    | 9  | State the process for selecting studies (i.e., screening, eligibility, included in systematic review, and, if applicable, included in the meta-analysis).                                                                                                                                                   | Page 12            |
| Data collection process            | 10 | Describe method of data extraction from reports (e.g., piloted forms, independently, in duplicate) and any processes for obtaining and confirming data from investigators.                                                                                                                                  | Page 12            |
| Data items                         | 11 | List and define all variables for which data were sought (e.g., PICOS, funding sources) and any assumptions and simplifications made.                                                                                                                                                                       | Page 12-13         |
| Risk of bias in individual studies | 12 | Describe methods used for assessing risk of bias of individual studies (including specification of whether this was done at the study or outcome level), and how this information is to be used in any data synthesis.                                                                                      | Page 12            |
| Summary measures                   | 13 | State the principal summary measures (e.g., risk ratio, difference in means).<br>For peer review only - <a href="http://bmjopen.bmj.com/site/about/guidelines.xhtml">http://bmjopen.bmj.com/site/about/guidelines.xhtml</a>                                                                                 | Pages 12-13        |

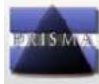

# PRISMA 2009 Checklist

|                      |    |                                                                                                                                                           |         |
|----------------------|----|-----------------------------------------------------------------------------------------------------------------------------------------------------------|---------|
| Synthesis of results | 14 | Describe the methods of handling data and combining results of studies, if done, including measures of consistency (e.g., $I^2$ ) for each meta-analysis. | Page 13 |
|----------------------|----|-----------------------------------------------------------------------------------------------------------------------------------------------------------|---------|

Page 1 of 2

| Section/topic                                                                                                                              | #  | Checklist item                                                                                                                                                                                           | Reported on page #         |
|--------------------------------------------------------------------------------------------------------------------------------------------|----|----------------------------------------------------------------------------------------------------------------------------------------------------------------------------------------------------------|----------------------------|
| Risk of bias across studies                                                                                                                | 15 | Specify any assessment of risk of bias that may affect the cumulative evidence (e.g., publication bias, selective reporting within studies).                                                             | Pages 12-13                |
| Additional analyses                                                                                                                        | 16 | Describe methods of additional analyses (e.g., sensitivity or subgroup analyses, meta-regression), if done, indicating which were pre-specified.                                                         | Page 13                    |
| <b>RESULTS</b>                                                                                                                             |    |                                                                                                                                                                                                          |                            |
| Study selection                                                                                                                            | 17 | Give numbers of studies screened, assessed for eligibility, and included in the review, with reasons for exclusions at each stage, ideally with a flow diagram.                                          | Page 15                    |
| Study characteristics                                                                                                                      | 18 | For each study, present characteristics for which data were extracted (e.g., study size, PICOS, follow-up period) and provide the citations.                                                             | Pages 16-19                |
| Risk of bias within studies                                                                                                                | 19 | Present data on risk of bias of each study and, if available, any outcome level assessment (see item 12).                                                                                                | Page 20, figure 2          |
| Results of individual studies                                                                                                              | 20 | For all outcomes considered (benefits or harms), present, for each study: (a) simple summary data for each intervention group (b) effect estimates and confidence intervals, ideally with a forest plot. | Pages 21-23                |
| Synthesis of results                                                                                                                       | 21 | Present results of each meta-analysis done, including confidence intervals and measures of consistency.                                                                                                  | Pages 7-8                  |
| Risk of bias across studies                                                                                                                | 22 | Present results of any assessment of risk of bias across studies (see Item 15).                                                                                                                          | Pages 20-figures 2,3,4,5,6 |
| Additional analysis                                                                                                                        | 23 | Give results of additional analyses, if done (e.g., sensitivity or subgroup analyses, meta-regression [see Item 16]).                                                                                    | Appendices 4-6             |
| <b>DISCUSSION</b>                                                                                                                          |    |                                                                                                                                                                                                          |                            |
| Summary of evidence                                                                                                                        | 24 | Summarize the main findings including the strength of evidence for each main outcome; consider their relevance to key groups (e.g., healthcare providers, users, and policy makers).                     | Pages 7-8, 24              |
| Limitations                                                                                                                                | 25 | Discuss limitations at study and outcome level (e.g., risk of bias), and at review-level (e.g., incomplete retrieval of identified research, reporting bias).                                            | Page 25                    |
| Conclusions                                                                                                                                | 26 | Provide a general interpretation of the results in the context of other evidence, and implications for future research.                                                                                  | Page 26                    |
| <b>FUNDING</b>                                                                                                                             |    |                                                                                                                                                                                                          |                            |
| For peer review only - <a href="http://bmjopen.bmj.com/site/about/guidelines.xhtml">http://bmjopen.bmj.com/site/about/guidelines.xhtml</a> |    |                                                                                                                                                                                                          |                            |



# PRISMA 2009 Checklist

1  
2  
3  
4  
5  
6  
7  
8  
9  
10  
11  
12  
13  
14  
15  
16  
17  
18  
19  
20  
21  
22  
23  
24  
25  
26  
27  
28  
29  
30  
31  
32  
33  
34  
35  
36  
37  
38  
39  
40  
41  
42  
43  
44  
45  
46  
47

|         |    |                                                                                                                                            |        |
|---------|----|--------------------------------------------------------------------------------------------------------------------------------------------|--------|
| Funding | 27 | Describe sources of funding for the systematic review and other support (e.g., supply of data); role of funders for the systematic review. | Page 2 |
|---------|----|--------------------------------------------------------------------------------------------------------------------------------------------|--------|

From: Moher D, Liberati A, Tetzlaff J, Altman DG, The PRISMA Group (2009). Preferred Reporting Items for Systematic Reviews and Meta-Analyses: The PRISMA Statement. PLoS Med 6(6): e1000097. doi:10.1371/journal.pmed1000097

For more information, visit: [www.prisma-statement.org](http://www.prisma-statement.org).

Page 2 of 2

For peer review only
